# Supplementary material for: Deconstructing Protein Binding of Sulfonamides and Sulfonamide Analogues
Source: PubMed Central journal article supplement — JACS Au. 2023 Aug 25;3(9):2478–86. doi: 10.1021/jacsau.3c00241 (PMC10523370; doi:10.1021/jacsau.3c00241), 2023-08-25
Supplement: au3c00241_si_001.pdf [file au3c00241_si_001.pdf]

# Deconstructing Protein Binding of Sulfonamides and Sulfonamide Analogs

Patrick L. Purder,<sup>[a]</sup> Christian Meyners,<sup>[a]</sup> Wisely Oki Sugiarto,<sup>[a]</sup> Jürgen Kolos,<sup>[a]</sup> Frank Löhr,<sup>[b]</sup> Jakob Gebel,<sup>[b]</sup> Thomas Nehls,<sup>[a]</sup> Volker Dötsch,<sup>[b]</sup> Frederik Lermyte,<sup>[a]</sup> Felix Hausch\*<sup>[a,c]</sup>

[a] Department of Organic Chemistry and Biochemistry, Clemens-Schöpf-Institute, Technical University Darmstadt, Alarich-Weiss-Straße 4, 64287 Darmstadt, Germany

[b] Institute of Biophysical Chemistry and Center for Biomolecular Magnetic Resonance, Goethe University, Max-von-Laue-Straße 9, 60438 Frankfurt am Main, Germany

[c] Centre for Synthetic Biology, Technical University of Darmstadt, 64287 Darmstadt, Germany

\*Corresponding Author: Felix Hausch, email: felix.hausch@tu-darmstadt.de

## Table of Contents:

|                     |    |
|---------------------|----|
| SI Figure 1 .....   | 4  |
| SI Figure 2 .....   | 6  |
| SI Figure 3 .....   | 7  |
| SI Table 1 .....    | 8  |
| SI Figure 4 .....   | 10 |
| SI Figure 5 .....   | 10 |
| SI Equation 1 ..... | 11 |
| SI Figure 6 .....   | 11 |
| SI Figure 7 .....   | 12 |
| SI Figure 8 .....   | 13 |
| SI Figure 9 .....   | 15 |
| SI Figure 10 .....  | 15 |
| SI Figure 11 .....  | 16 |
| SI Figure 12 .....  | 17 |
| SI Figure 13 .....  | 20 |
| SI Figure 14 .....  | 22 |

|                            |    |
|----------------------------|----|
| SI Figure 15 .....         | 26 |
| SI Figure 16.....          | 28 |
| SI Figure 17.....          | 29 |
| SI Table 2 .....           | 30 |
| SI Table 3 .....           | 30 |
| SI Table 4 .....           | 32 |
| SI Table 5 .....           | 33 |
| Synthetic prorecures ..... | 35 |

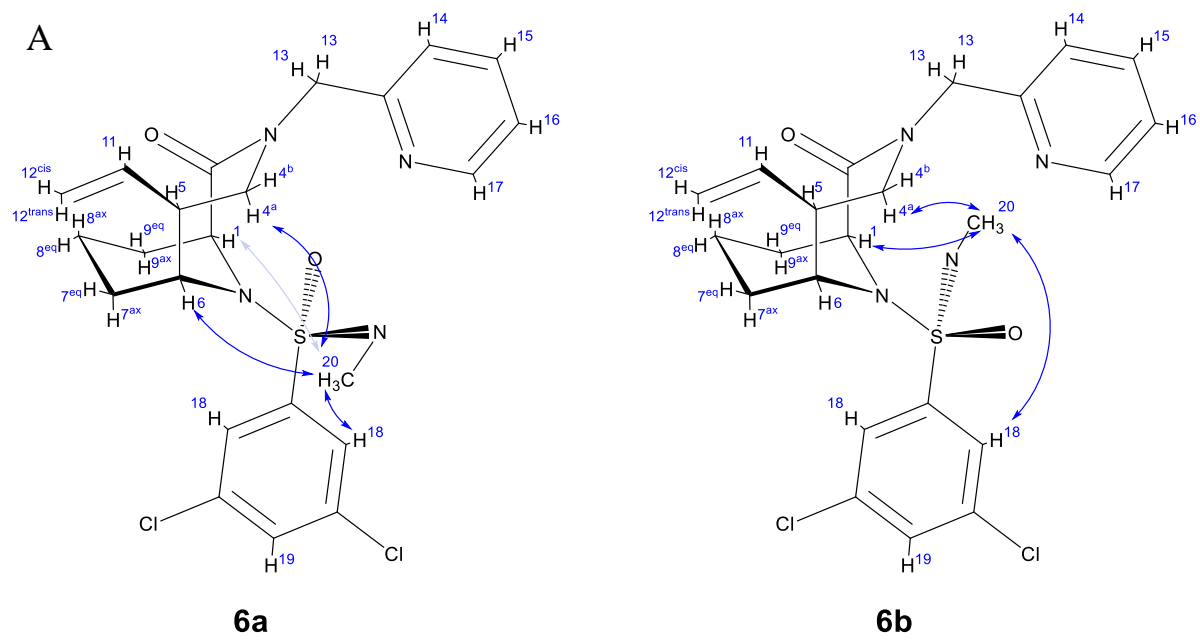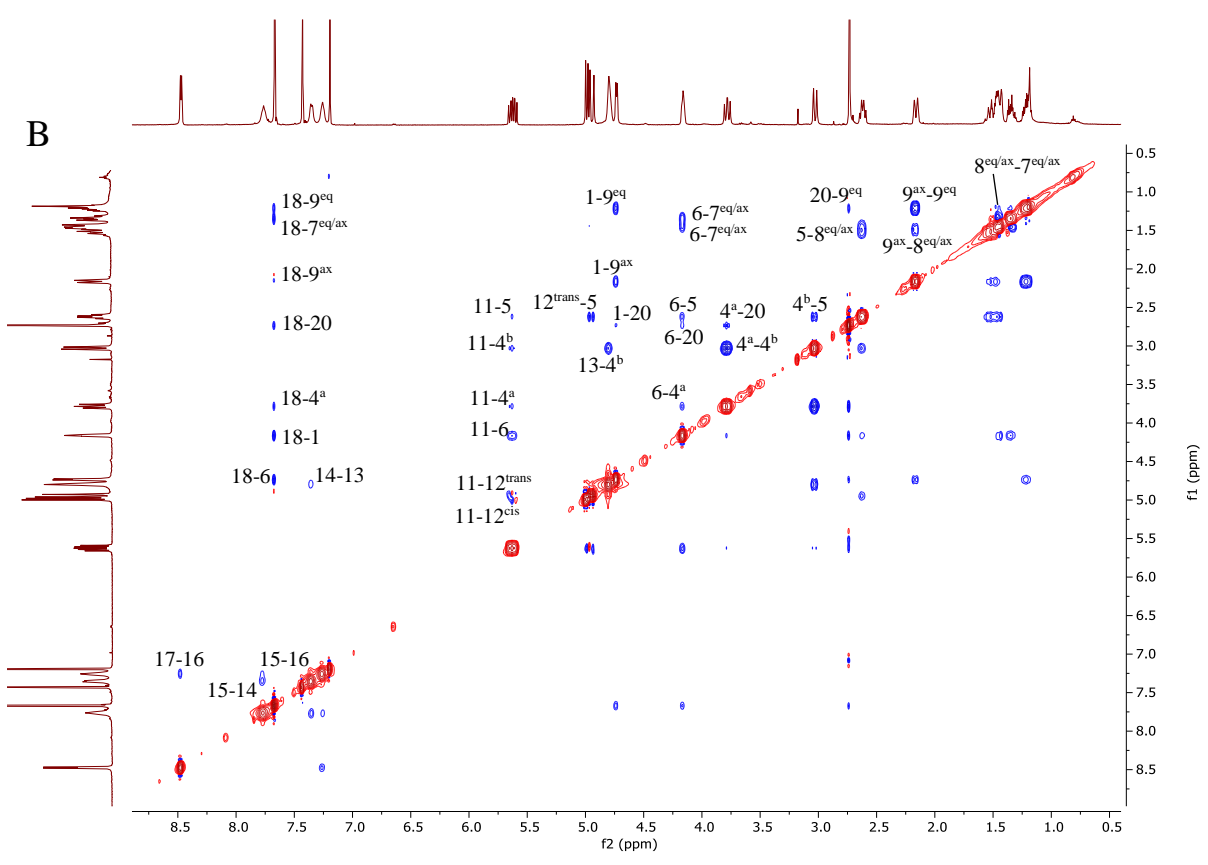

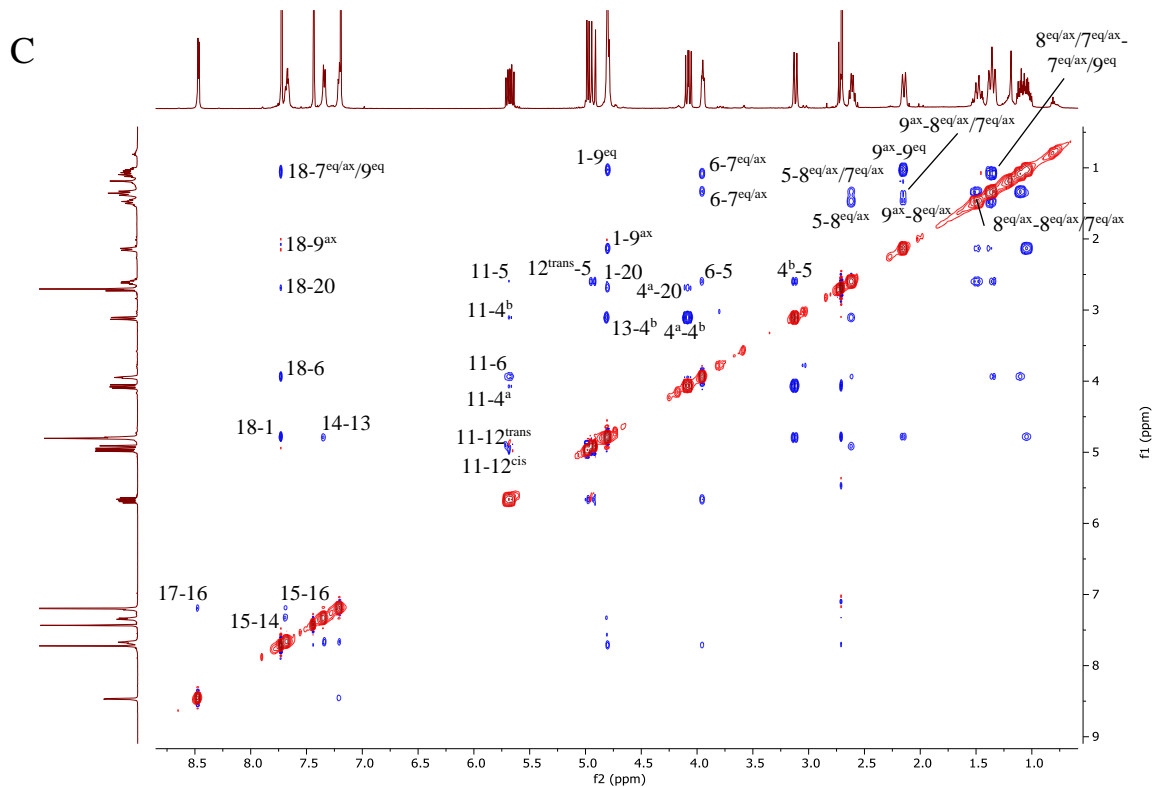

**SI Figure 1.** A) Structures of **6a** and **6b** with numbered protons.  $^1\text{H}$ - $^1\text{H}$  NOESY interactions of  $\text{H}^{20}$  shown in blue arrows. B)  $^1\text{H}$ - $^1\text{H}$  NOESY spectrum of **6a**. C)  $^1\text{H}$ - $^1\text{H}$  NOESY spectrum of **6b**. In both compounds,  $\text{H}^{18}$  couples with  $\text{H}^1$ ,  $\text{H}^6$ ,  $\text{H}^7$  and  $\text{H}^9$ , suggesting that the dichlorophenyl group is positioned underneath the pipercolate. In **6a**, a weak coupling between  $\text{H}^{18}$  and  $\text{H}^{4a}$  can be observed, showing a small population of the conformation where the dichlorophenyl ring is positioned away from the pipercolate.  $\text{H}^{20}$  couples with  $\text{H}^6$  and weakly with  $\text{H}^1$ . The coupling to  $\text{H}^1$  likely corresponds to the conformation in which the dichlorophenyl ring is positioned away from the pipercolate. In **6b**,  $\text{H}^{20}$  couples with  $\text{H}^1$ , but not with  $\text{H}^6$ . These couplings are only possible if **6a** has a *S*-configured and **6b** a *R*-configured sulfur atom.

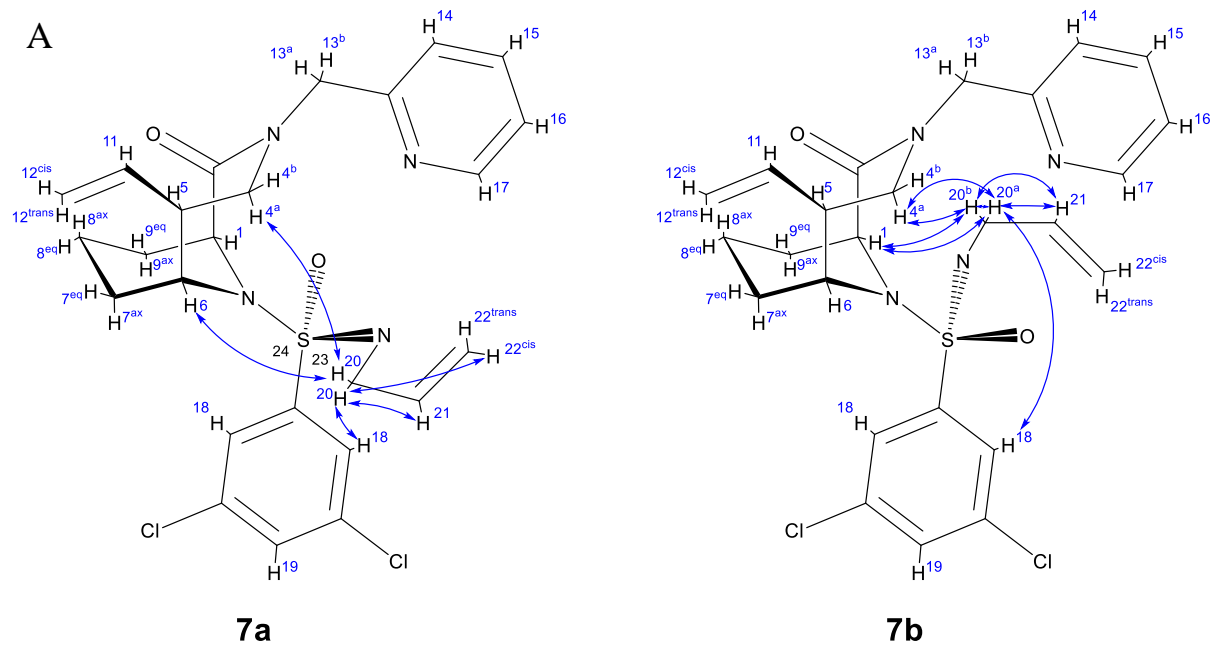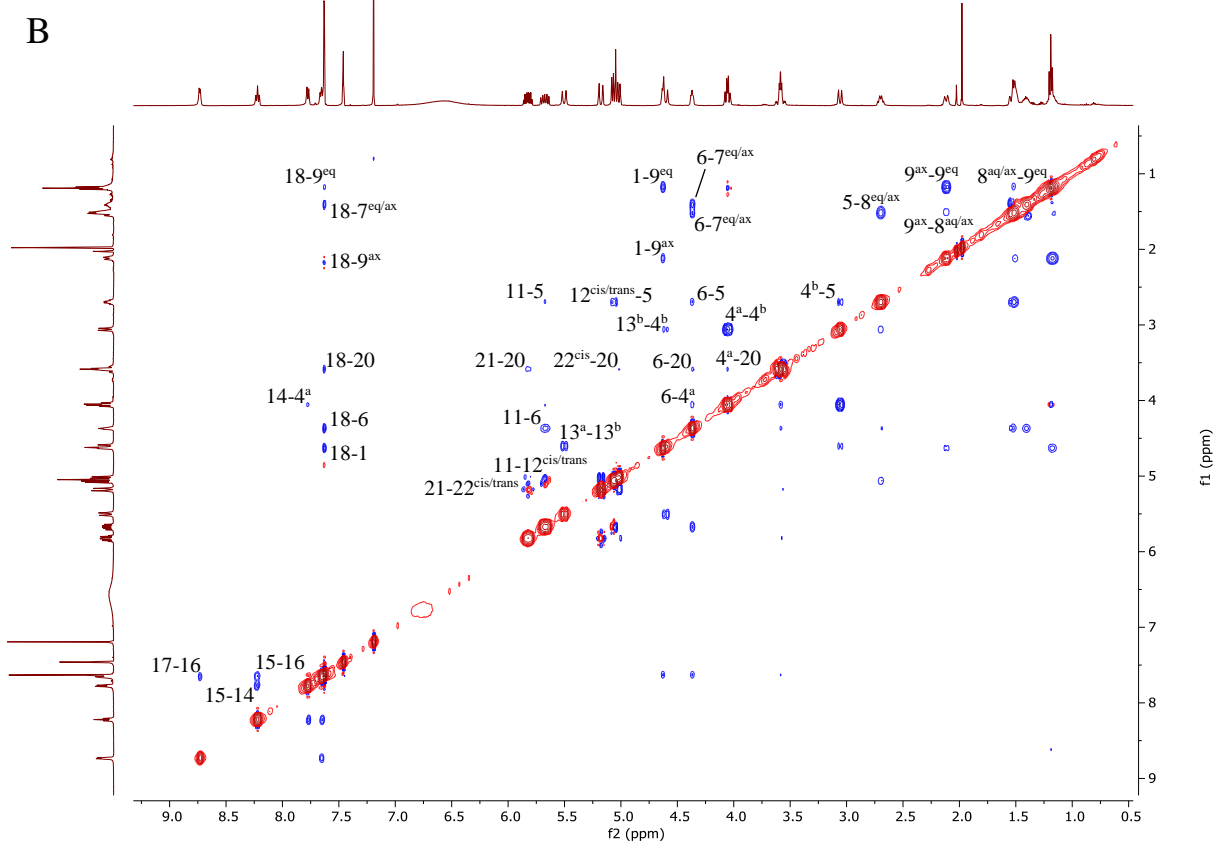

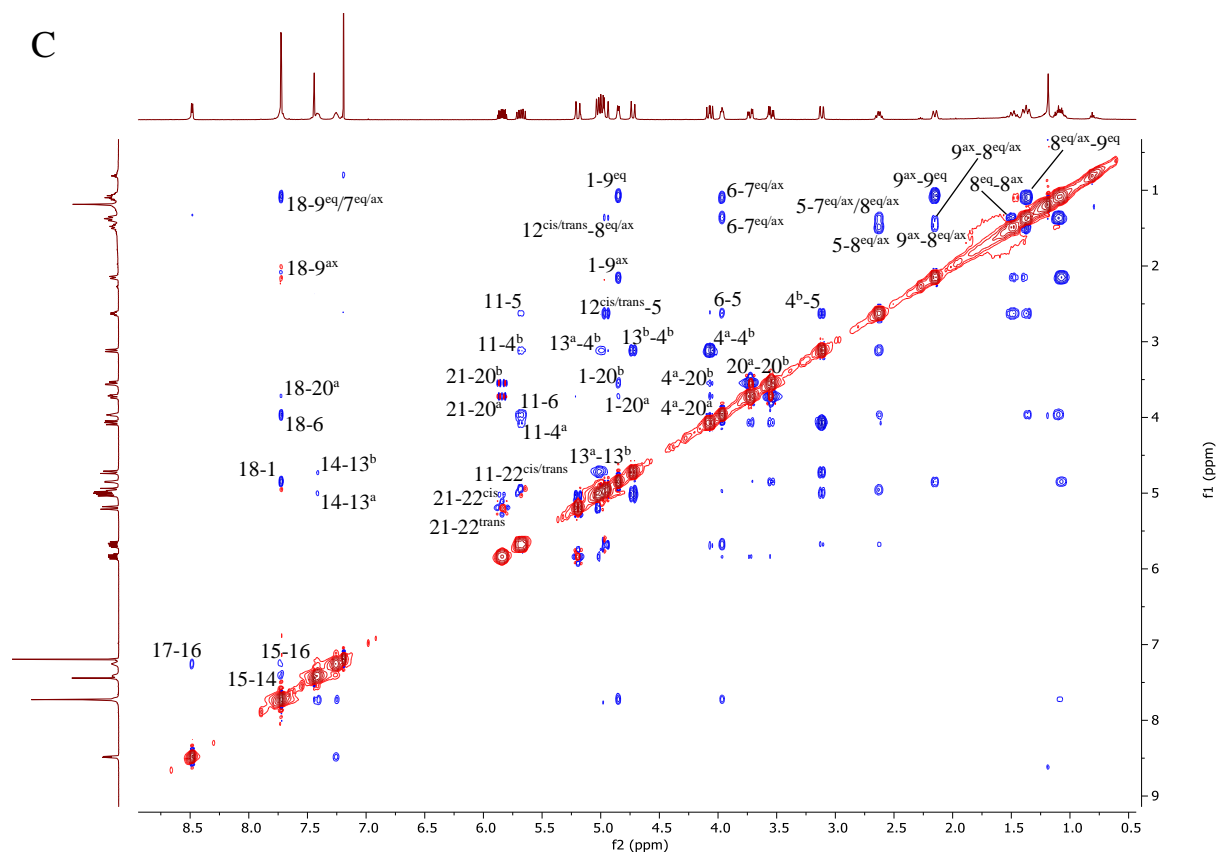

**SI Figure 2.** A) Structures of **7a** and **7b** with numbered protons.  $^1\text{H}$ - $^1\text{H}$  NOESY interactions of  $\text{H}^{20}$  shown in blue arrows. B)  $^1\text{H}$ - $^1\text{H}$  NOESY spectrum of **7a**. C)  $^1\text{H}$ - $^1\text{H}$  NOESY spectrum of **7b**. In both compounds,  $\text{H}^{18}$  couples with  $\text{H}^1$ ,  $\text{H}^6$ ,  $\text{H}^7$  and  $\text{H}^9$ , suggesting that the dichlorophenyl group is positioned underneath the piperolate. In **7a**  $\text{H}^{20}$  couples with  $\text{H}^6$  but not with  $\text{H}^1$ . In **7b**,  $\text{H}^{20}$  couples with  $\text{H}^1$ , but not with  $\text{H}^6$ . These couplings are only possible if **7a** has a *S*-configured and **7b** a *R*-configured sulfur atom.

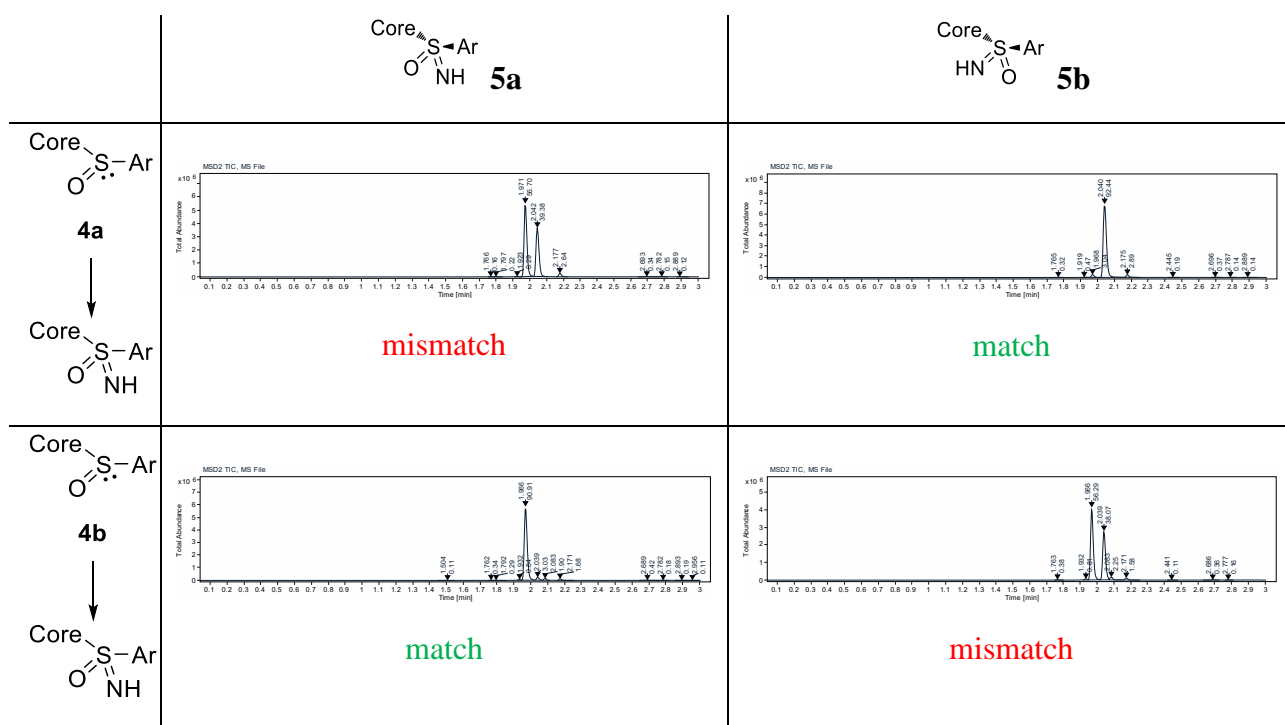

**SI Figure 3.** Isolated sulfonamides **4a** and **b** were iminated via a nitrene under literature known conditions. This imination reaction is known to proceed under retention of the stereocenter at the sulfur atom. The imination reactions of the isolated sulfonamides **4a** and **b** were co-injected in a LC-MS analysis with the diastereomerically pure and assigned **5a** and **b**. To allow an easier evaluation of the experiment, single ion monitoring (SIM) mass spectrometry was performed, analyzing only the mass of the sulfonimidamide product. The sulfonimidamide formed from sulfonamide **4a** matches with the reference sulfonimidamide **5b**, and the sulfonimidamide of **4b** matches with **5a**. Under retention of the configuration of the sulfur atom, the sulfonamide **4a** must be in *S*-configuration and **4b** in *R*-configuration.

**SI Table 1.** Binding affinities of all sulfonamide analogs for FKBP12, FKBP12.6, FKBP51FK1, FKBP52FK1, AbFBP (1-113) and paFKPA (23-253), measured in a competitive fluorescence polarization assay. Core = (1*S*,5*S*,6*R*)-2-oxo-3-(pyrin-2-ylmethyl)-3,10-diazabicyclo[4.3.1]decan-10-yl, Ar = 3,5-dichlorophenyl (corresponds to 2, see Scheme 1). \*Cocrystal structure with FKBP12 solved. †Cocrystal structure with FKBP51FK1 solved. n.a. = not available, data was not measured.

| Compound    | Structure C5 substituent | Sulfur motif | K <sub>D</sub> for <b>FKBP 12</b> in nM | K <sub>D</sub> for <b>FKBP 12.6</b> in nM | K <sub>D</sub> for <b>FKBP 51</b> in nM | K <sub>D</sub> for <b>FKBP 52</b> in nM | K <sub>D</sub> for <b>Ab-FBP(1-113)</b> in nM | K <sub>D</sub> for <b>paFKPA (23-253)</b> in nM |
|-------------|--------------------------|--------------|-----------------------------------------|-------------------------------------------|-----------------------------------------|-----------------------------------------|-----------------------------------------------|-------------------------------------------------|
| <b>1*</b>   | Vinyl                    |              | 2.6 ± 0.2                               | 6.9 ± 0.6                                 | 97 ± 6                                  | 92 ± 2                                  | 2.2 ± 0.4                                     | 38 ± 6                                          |
| <b>3</b>    | Vinyl                    |              | 509 ± 152                               | 1,360 ± 520                               | > 40,000                                | > 40,000                                | 5,340 ± 2300                                  | 7,370 ± 890                                     |
| <b>4a</b>   | Vinyl                    |              | 129 ± 19                                | 394 ± 68                                  | 4,780 ± 900                             | 5,210 ± 1,200                           | 104 ± 9                                       | 851 ± 98                                        |
| <b>4b*†</b> | Vinyl                    |              | 67 ± 5                                  | 211 ± 32                                  | 2,240 ± 330                             | 3,980 ± 1,260                           | 265 ± 29                                      | 3,690 ± 350                                     |
| <b>5a*†</b> | Vinyl                    |              | 360 ± 27                                | 857 ± 188                                 | 12,600 ± 3,700                          | 20,000 ± 3000                           | 828 ± 95                                      | 8,460 ± 840                                     |
| <b>5b*†</b> | Vinyl                    |              | 283 ± 24                                | 608 ± 128                                 | 11,800 ± 3,000                          | 12,000 ± 2,400                          | 803 ± 85                                      | 8,800 ± 840                                     |
| <b>6a*†</b> | Vinyl                    |              | 1,390 ± 190                             | 3,650 ± 230                               | > 40,000                                | > 40,000                                | 5,720 ± 370                                   | > 40,000                                        |
| <b>6b</b>   | Vinyl                    |              | 1,160 ± 120                             | 4,380 ± 260                               | > 40,000                                | > 40,000                                | 4,350 ± 260                                   | > 40,000                                        |
| <b>7a</b>   | Vinyl                    |              | 1,570 ± 180                             | 7,700 ± 830                               | > 40,000                                | > 40,000                                | 3,600 ± 260                                   | > 40,000                                        |
| <b>7b</b>   | Vinyl                    |              | 912 ± 108                               | 4,580 ± 260                               | > 40,000                                | > 40,000                                | 4,700 ± 260                                   | > 40,000                                        |



|           |                    |                                                                                     |            |              |          |          |              |          |
|-----------|--------------------|-------------------------------------------------------------------------------------|------------|--------------|----------|----------|--------------|----------|
| <b>8a</b> | Vinyl              | 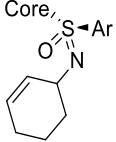   | 490 ±57    | 3,990 ±870   | > 40,000 | > 40,000 | 2,090 ±150   | > 40,000 |
| <b>8b</b> | Vinyl              |    | 577 ±85    | 4,030 ±950   | > 40,000 | > 40,000 | n.A.         | n.A.     |
| <b>9a</b> | Vinyl              |    | 658 ±160   | 4,380 ±900   | > 40,000 | > 40,000 | 3,390 ±330   | > 40,000 |
| <b>9b</b> | Vinyl              |   | > 40,000   | > 40,000     | > 40,000 | > 40,000 | 2,680 ±440   | > 40,000 |
| <b>11</b> | 1,2-Dihydroxyethyl |  | 0.6 ±0.1   | 3.2 ±0.3     | 30 ±3    | 25 ±3    | n.a.         | n.a.     |
| <b>10</b> | 1,2-Dihydroxyethyl |  | 8,770 ±610 | 23,600 ±2600 | > 40,000 | > 40,000 | 6,270 ±1,290 | > 40,000 |

---



$$\Delta\Delta G = \Delta G_2 - \Delta G_1 = -RT \ln \left( \frac{c^\circ}{K_{D2}} \right) + RT \ln \left( \frac{c^\circ}{K_{D1}} \right) = RT \ln \left( \frac{K_{D2}}{K_{D1}} \right)$$

**SI Equation 1.** Calculating the difference in free binding  $\Delta\Delta G$  for two different ligands from their respective binding affinities  $K_{D2}$  and  $K_{D1}$ .  $c^\circ$  is the standard concentration of 1 mol/L.

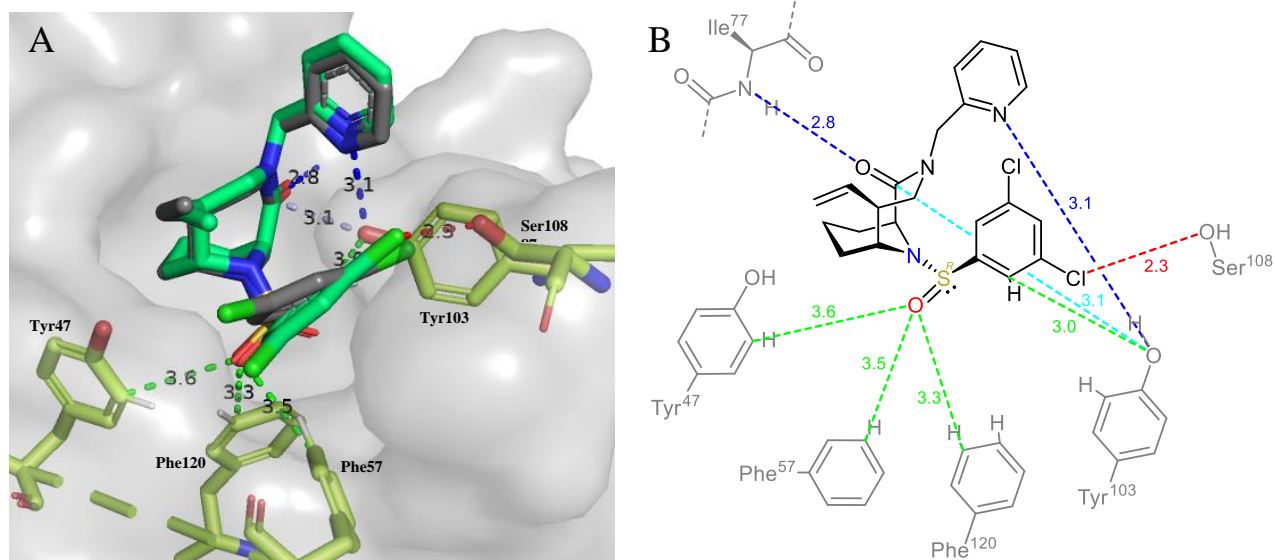

**SI Figure 6.** Cocystal structure of **4b** and FK1 domain of FKBP51 (PDB: 8CHP) overlaid with **1** (grey, from cocystal structure with FKBP12). 3D- and 2D-Interaction network shown. Hydrogen bonds are shown in blue, haloge- $\pi$ -interactions are shown in red, CH...O interactions are shown in green, other polar contacts are shown in light blue. Distances of dashed lines are given in Å.

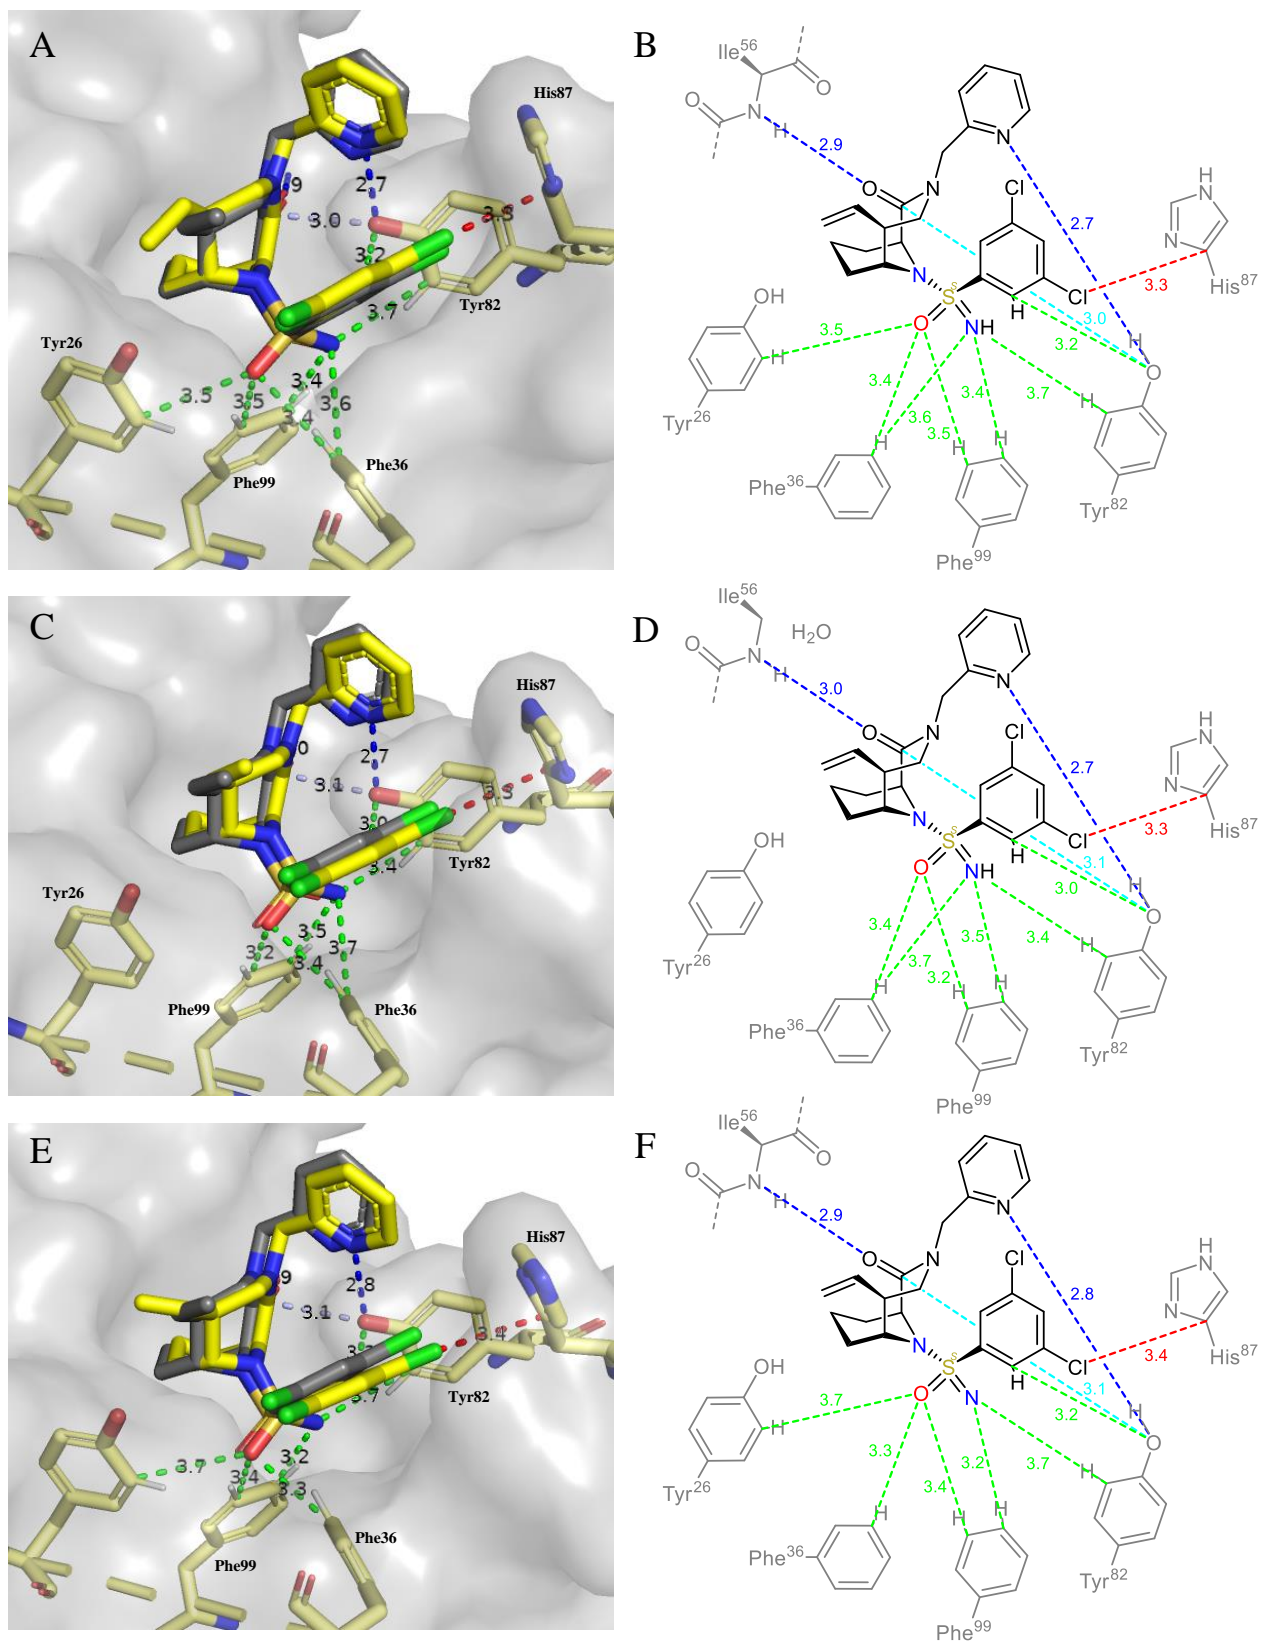

**SI Figure 7.** Cocystal structure of **5a** and FKBP12 (PDB: 8CHK). **5a**-FKBP12 crystallized with three complexes per unit cell (A+B: Chain A; C+D: Chain B; E+F: Chain C). Each complex is overlaid with **1** (grey). 3D- and 2D-Interaction network of each complex in the unit cell shown. Hydrogen bonds are shown in blue, halogen- $\pi$ -interactions are shown in red, CH...O interactions are shown in green, other polar contacts are shown in light blue. Distances of dashed lines are given in Å.

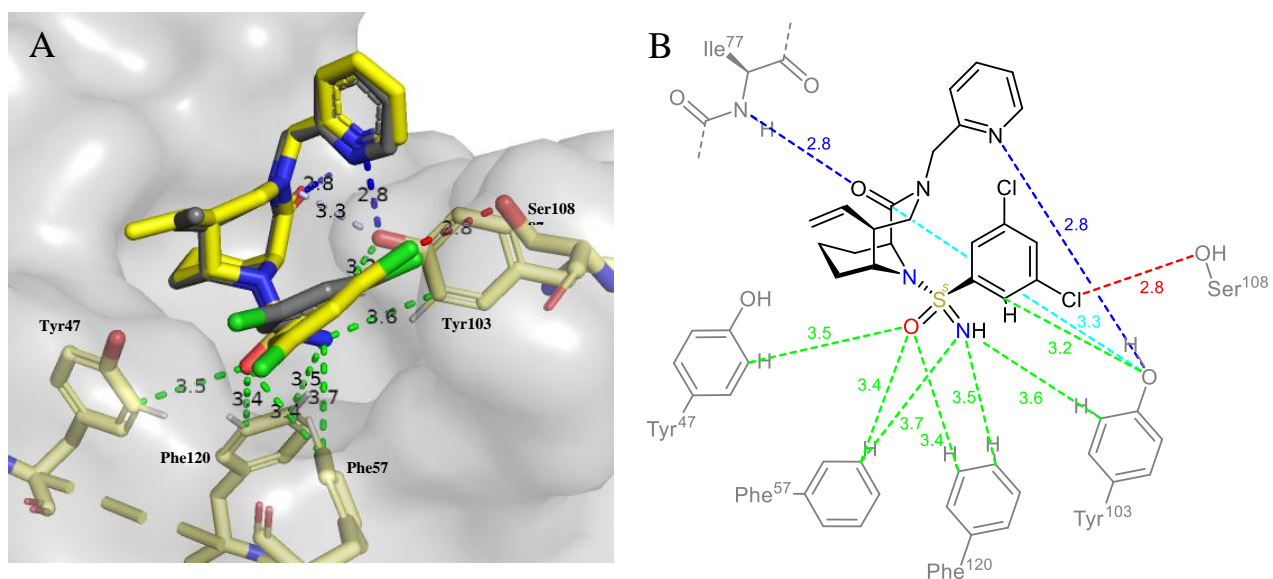

**SI Figure 8.** Cocystal structure of **5a** and FK1 domain of FKBP51 (PDB: 8CHN) overlaid with **1** (grey, from cocystal structure with FKBP12). 3D- and 2D-Interaction network of each complex in the unit cell shown. Hydrogen bonds are shown in blue, halogen- $\pi$ -interactions are shown in red, CH...O interactions are shown in green, other polar contacts are shown in light blue. Distances of dashed lines are given in Å.



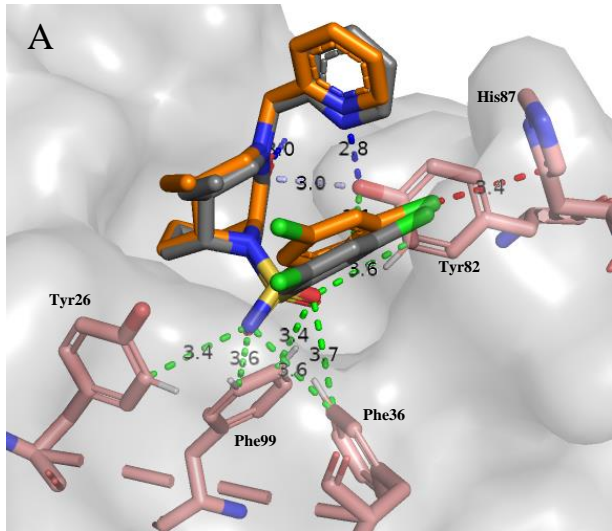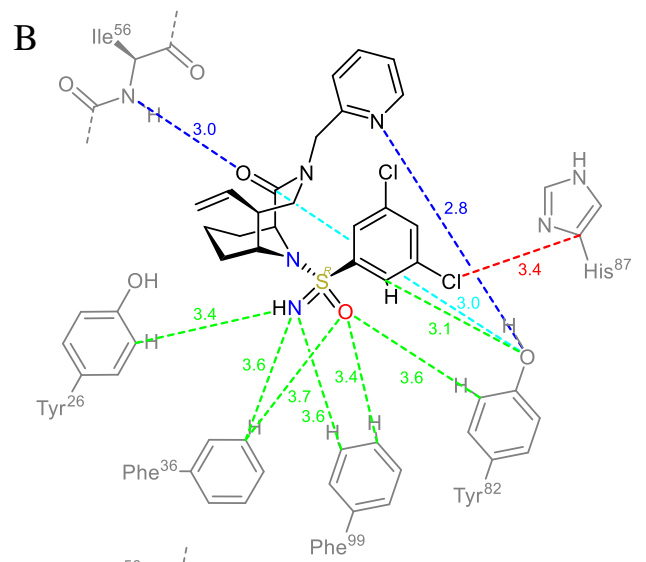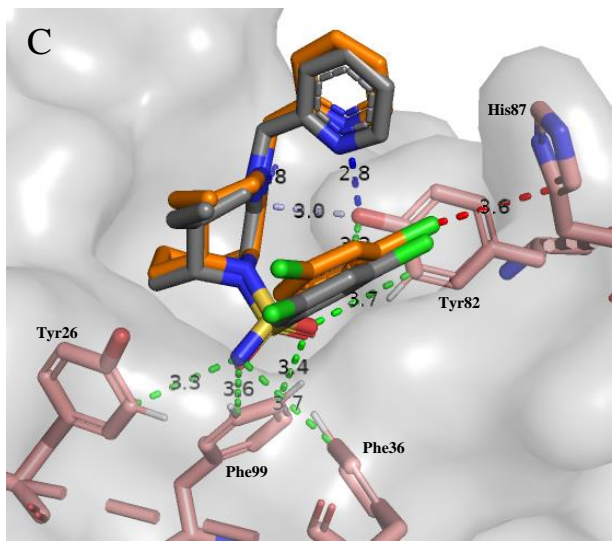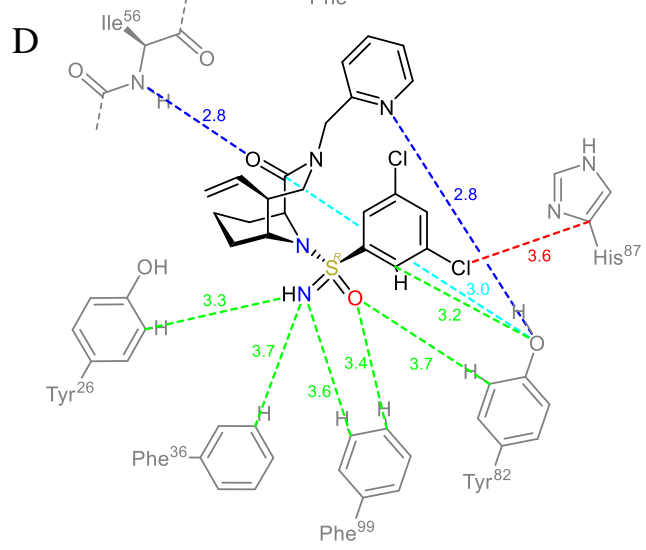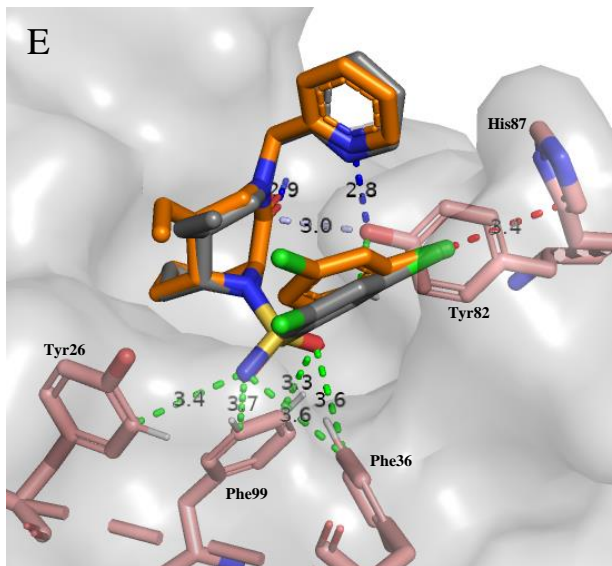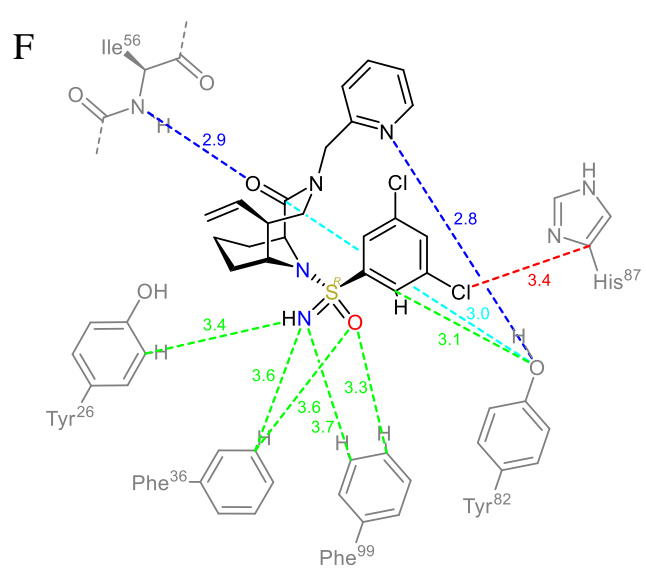

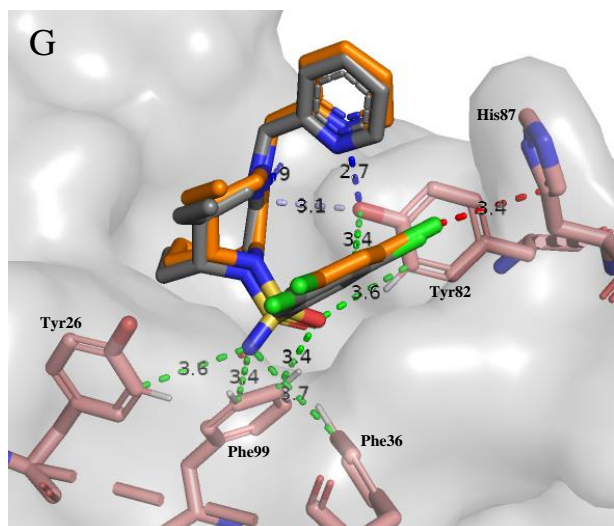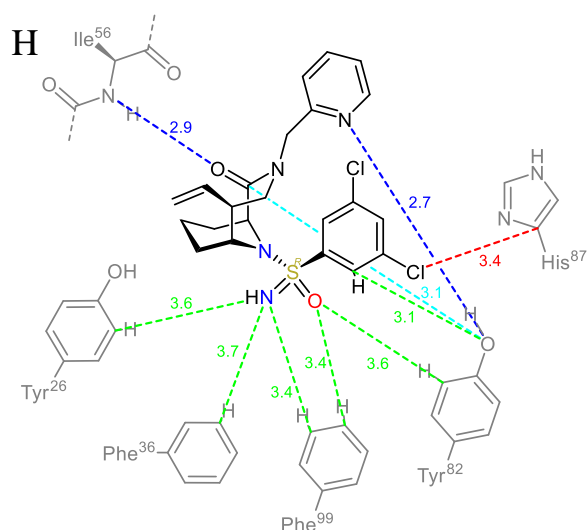

**SI Figure 9.** Cocrystal structure of **5b** and FKBP12 (PDB: 8CHJ). **5b**-FKBP12 crystallized with four complexes per unit cell (A+B: Chain A; C+D: Chain B; E+F: Chain C; G+H: Chain D). Each complex is overlaid with **1** (grey). 3D- and 2D-Interaction network of each complex in the unit cell shown. Hydrogen bonds are shown in blue, halogen- $\pi$ -interactions are shown in red, CH...O interactions are shown in green, other polar contacts are shown in light blue. Distances of dashed lines are given in Å.

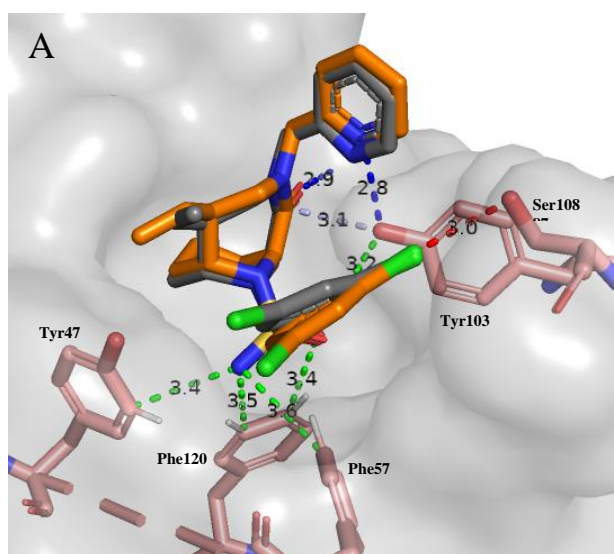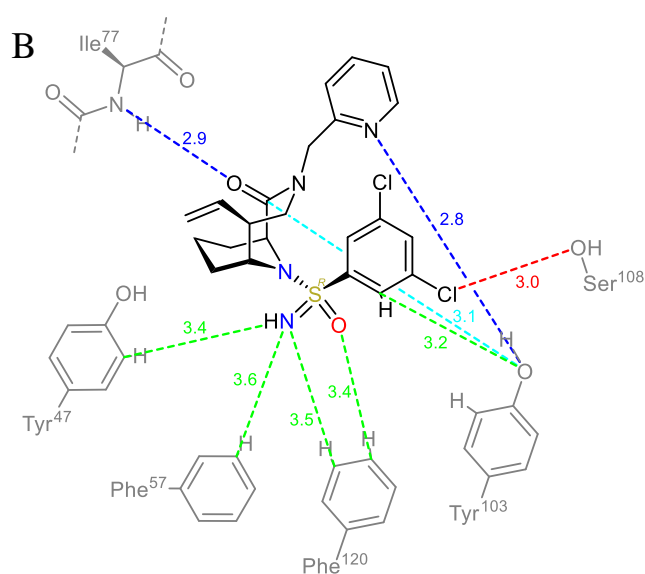

**SI Figure 10.** Cocrystal structure of **5b** and FK1 domain of FKBP51 (PDB: 8CHR) overlaid with **1** (grey, from cocrystal structure with FKBP12). 3D- and 2D-Interaction network of each complex in the unit cell shown. Hydrogen bonds are shown in blue, halogen- $\pi$ -interactions are shown in red, CH...O interactions are shown in green, other polar contacts are shown in light blue. Distances of dashed lines are given in Å.

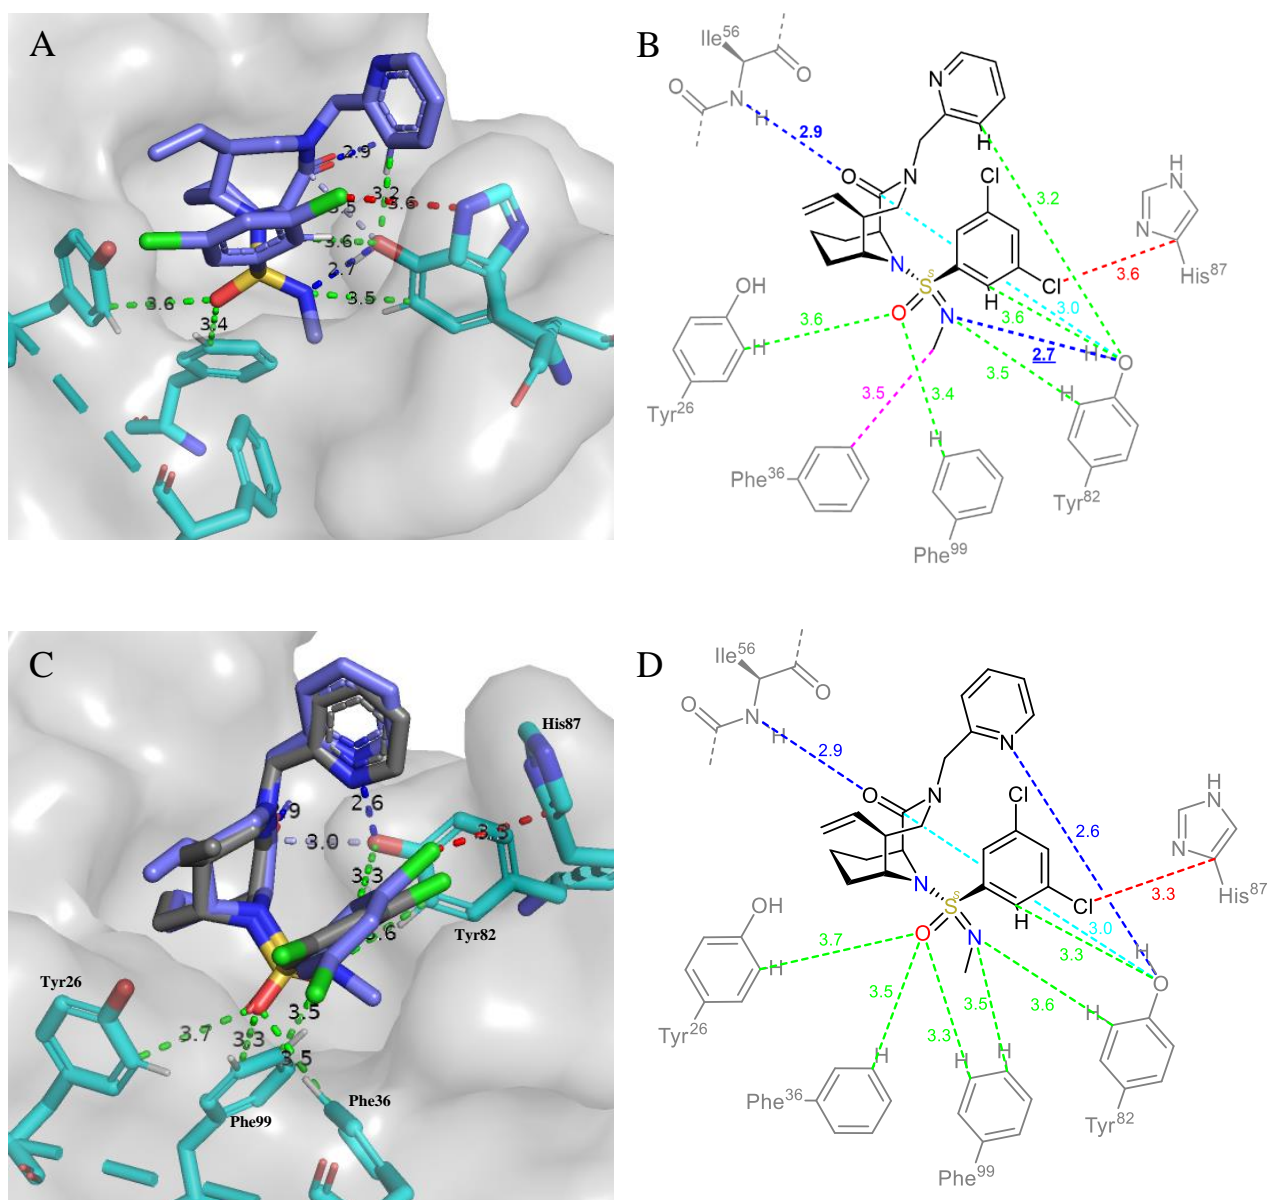

**SI Figure 11.** Cocrystal structure of **6a** and FKBP12 (PDB: 8CHI). **6a**-FKBP12 crystallized with two complexes per unit cell (A+B: Chain A; C+D: Chain B). Chain A was shown in the main manuscript (Fig. 2 E) and is shown here again in a different perspective to highlight the novel hydrogen bond of the sulfonimidamide. Complex C is overlaid with **1** (grey). 3D- and 2D-Interaction network of each complex in the unit cell shown. Hydrogen bonds are shown in blue, haloge- $\pi$ -interactions are shown in red, CH...O interactions are shown in green, other polar contacts are shown in light blue. Distances of dashed lines are given in Å.



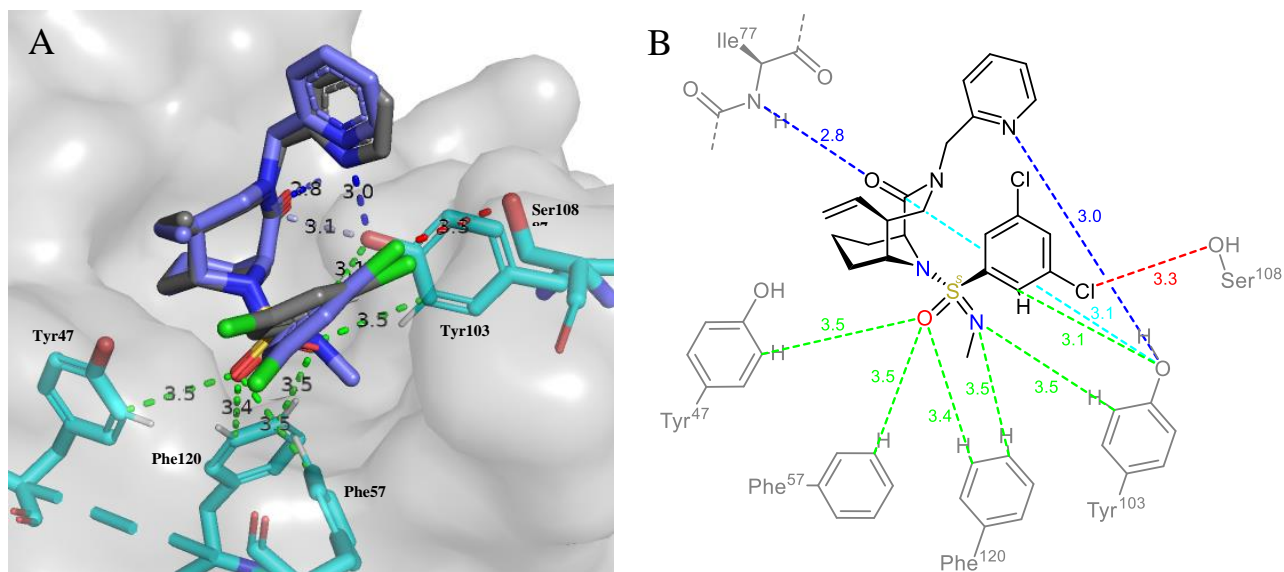

**SI Figure 12.** Cocystal structure of **6a** and FK1 domain of FKBP51 (PDB: 8CHQ) overlaid with **1** (grey, from cocystal structure with FKBP12). 3D- and 2D-Interaction network of each complex in the unit cell shown. Hydrogen bonds are shown in blue, haloge- $\pi$ -interactions are shown in red, CH...O interactions are shown in green, other polar contacts are shown in light blue. Distances of dashed lines are given in Å.

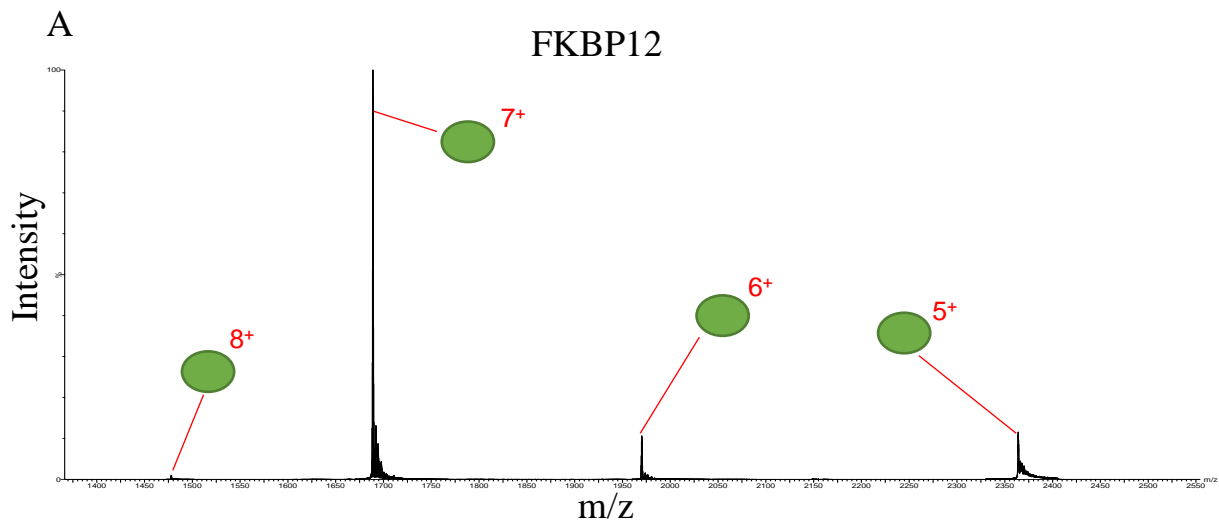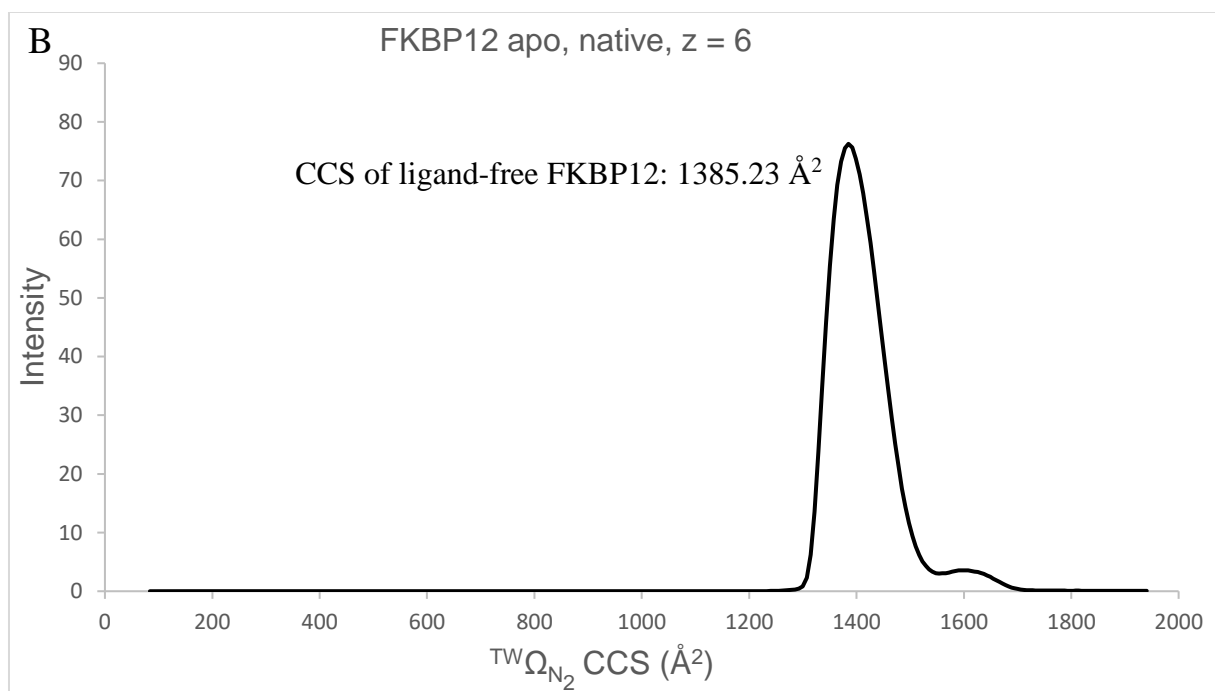

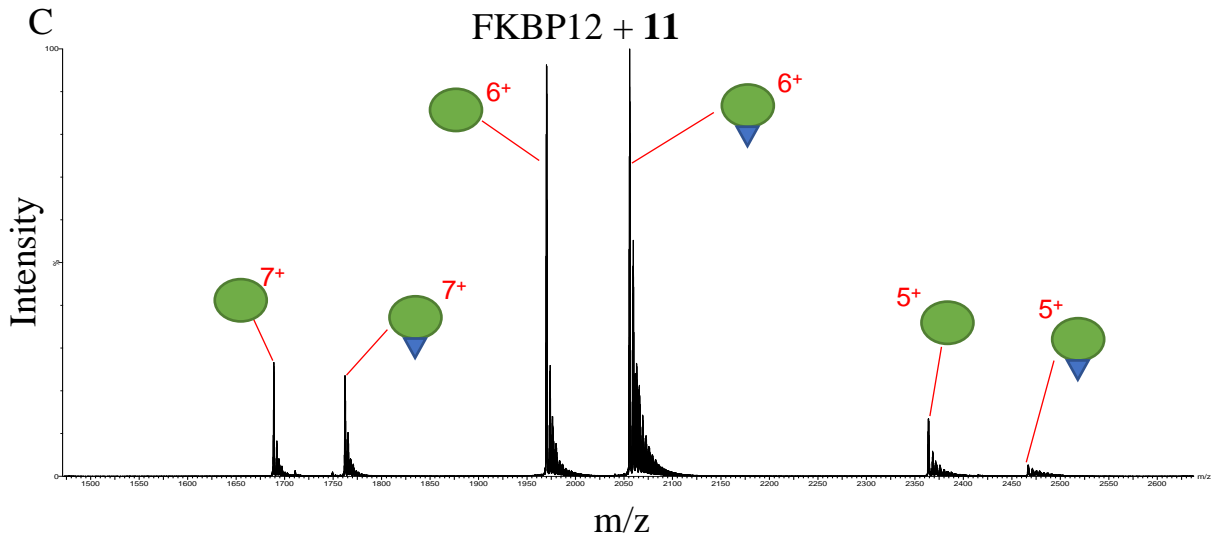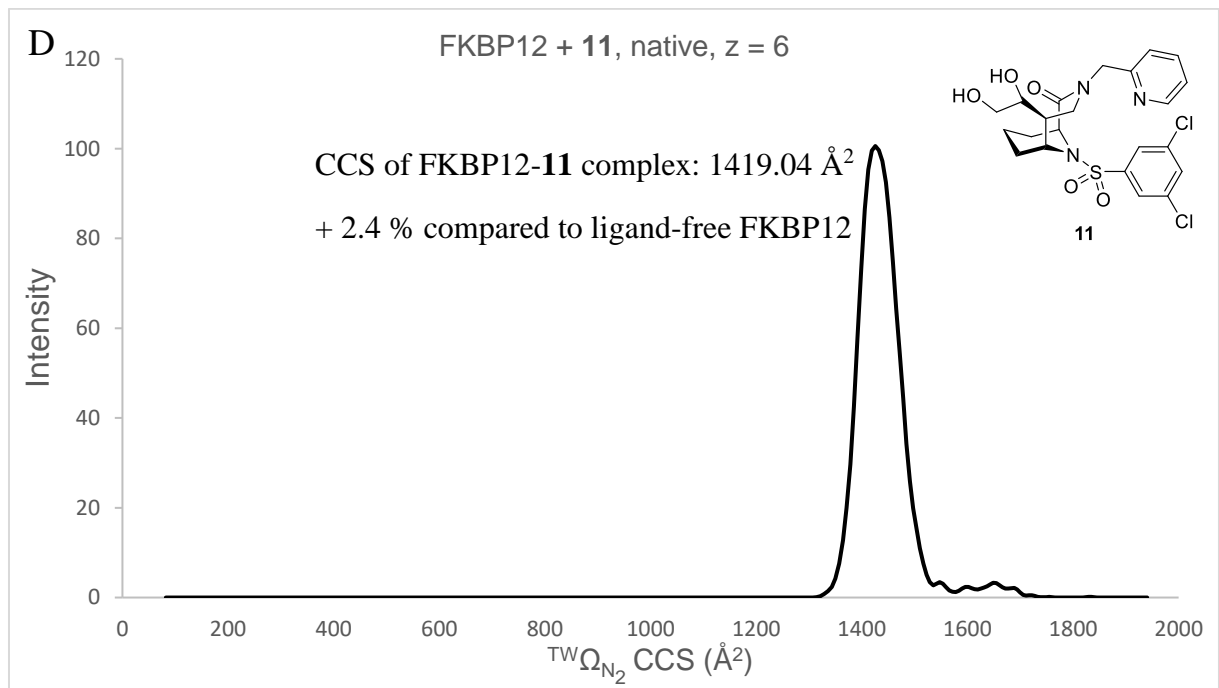

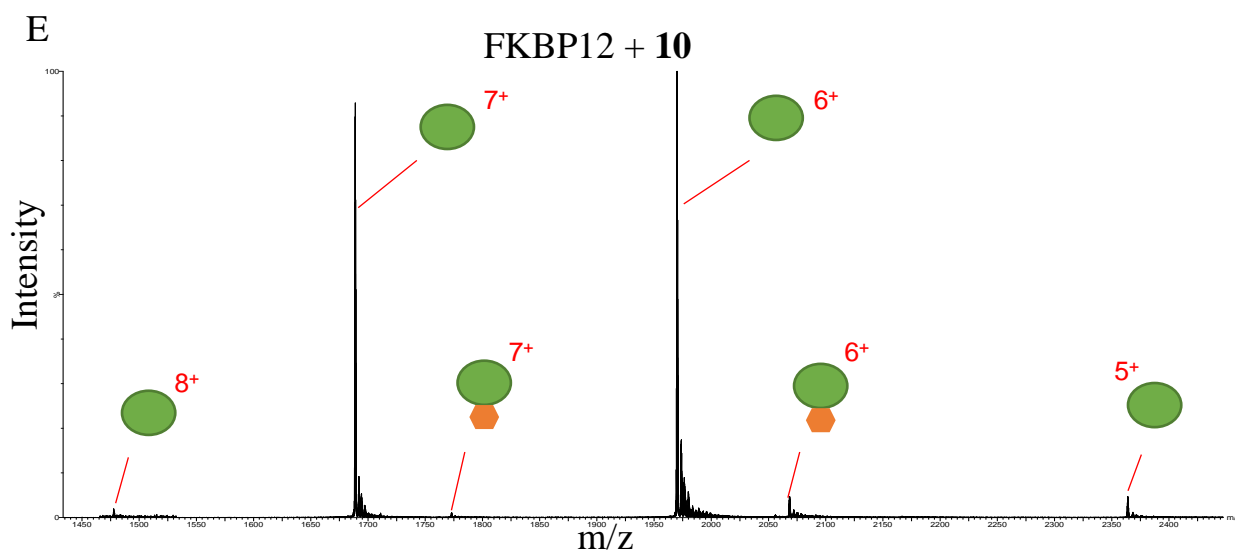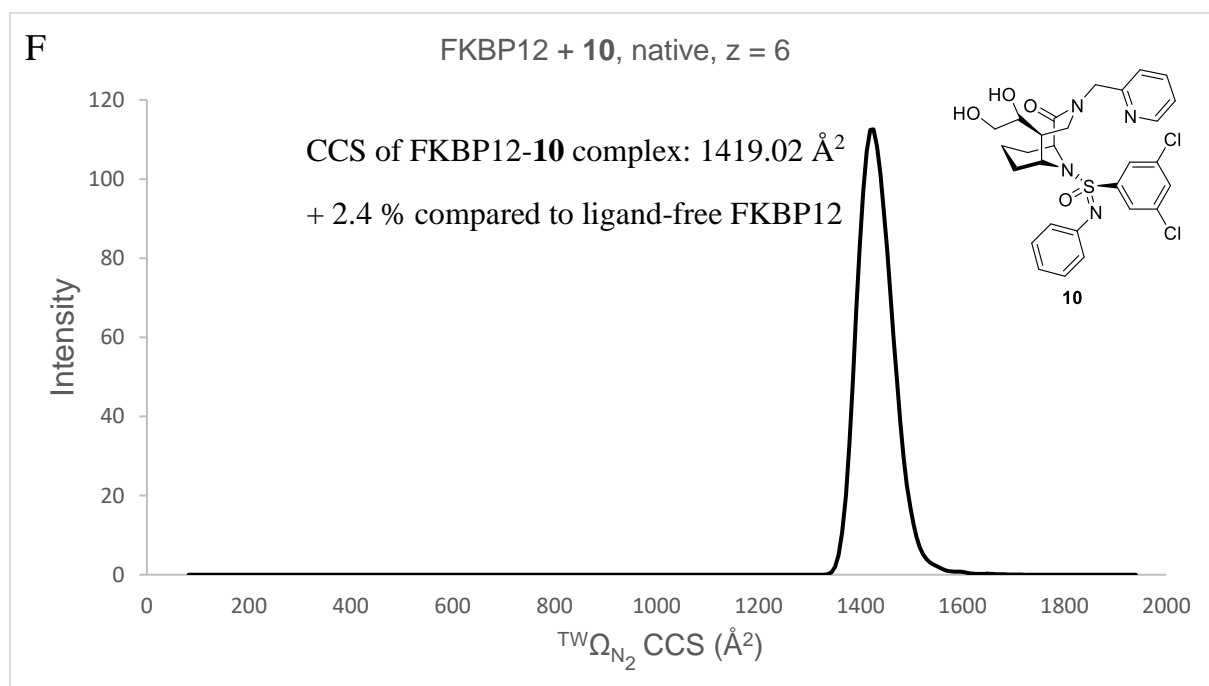

**SI Figure 13.** Ion mobility mass spectra of FKBP12-ligand complexes. Mass spectra of native FKBP12 (represented by green oval) (A), native FKBP12 with **11** (blue triangle) (C) and native FKBP12 with **10** (orange hexagon) (E). Ion mobility data (B, D, F) show that there is only a small increase in collision cross section of the bound complexes compared to the ligand-free state (data for the 6+ charge state shown in all three cases), indicating that no major conformational change occurs upon binding.

A) FKBP12 without ligand

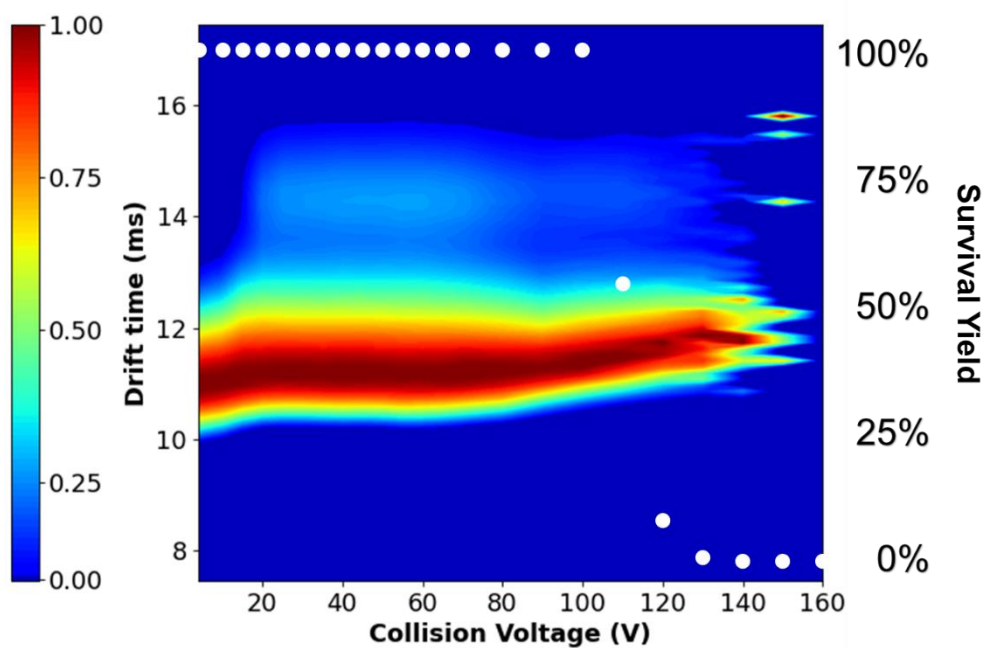

B) FKBP12 in complex with **11**

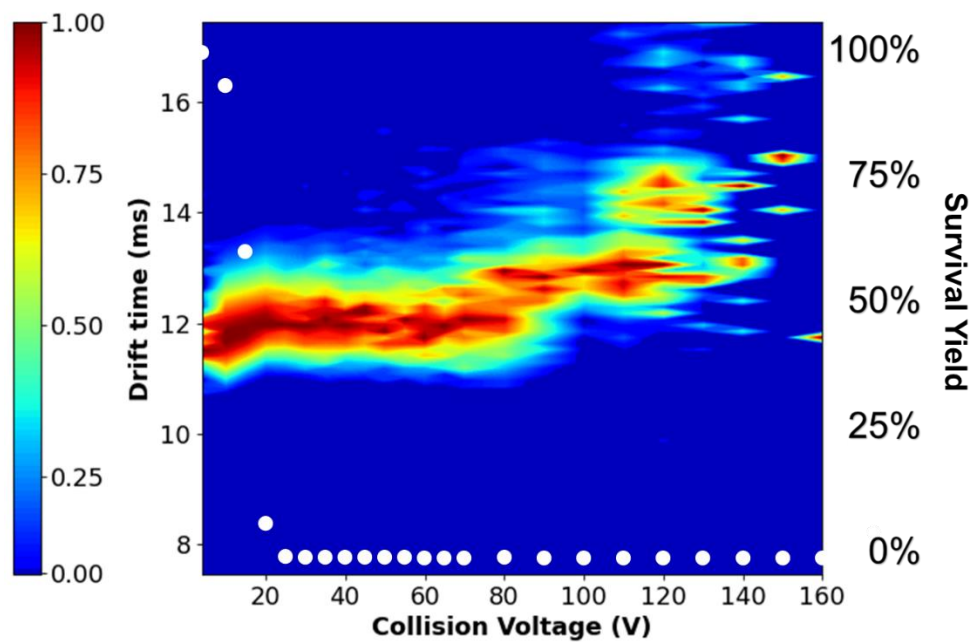

### C) FKBP12 in complex with **10**

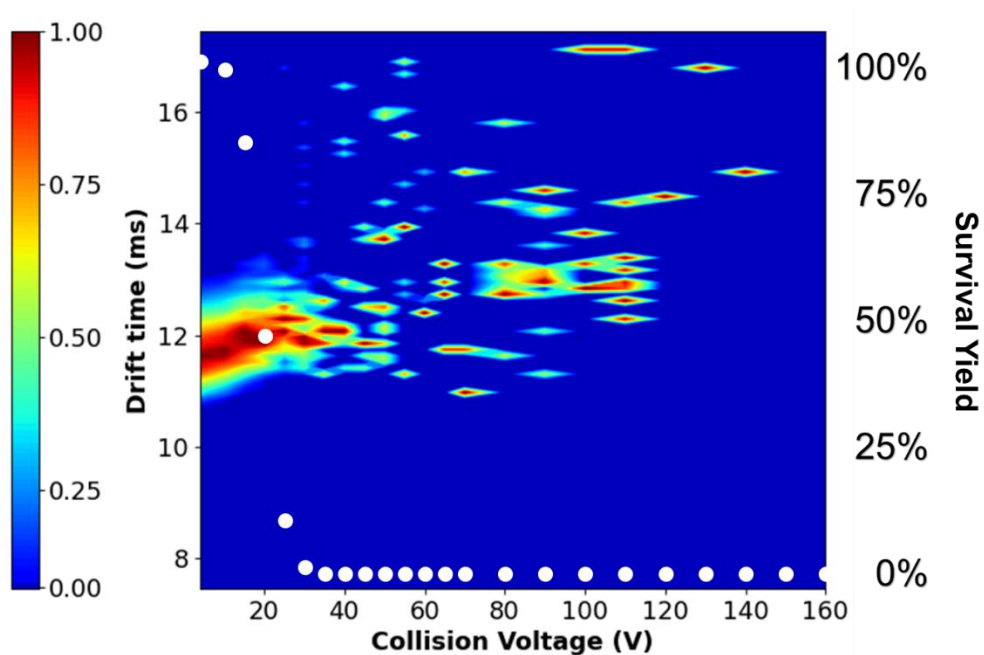

**SI Figure 14.** Collision-induced unfolding and dissociation of native FKBP12 (A), the FKBP12-**11** (B) and the FKBP12-**10** (C) complex. The survival yield of each analyzed species (*i.e.*, the fraction of the population of the complex ions that remains intact) is shown in white dots as a function of the collision energy. Although the survival yield of both FKBP12-**11** and -**10** complexes is small beyond 20-40 V collision energy, traces of the FKBP12-**11** complex (B) are clearly detectable up to 110 V collision energy, whereas the FKBP12-**10** complex (C) is not detectable anymore. This indicates a greater stability of the FKBP12-**11** complex compared to the FKBP12-**10** complex under these experimental conditions. Note that when the survival yield drops to zero, no meaningful data were acquired beyond that collision energy, and therefore the apparent signals in panel C beyond 40 V only represent detector noise plotted by the CIU visualization software.<sup>1</sup>

**A)**

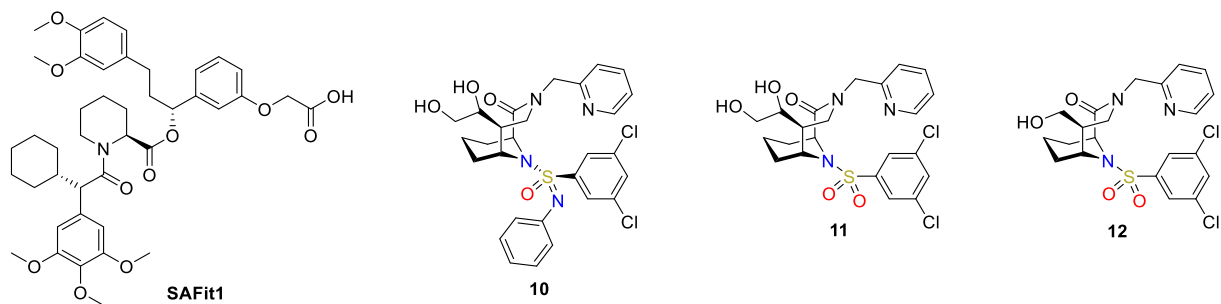

**B)**

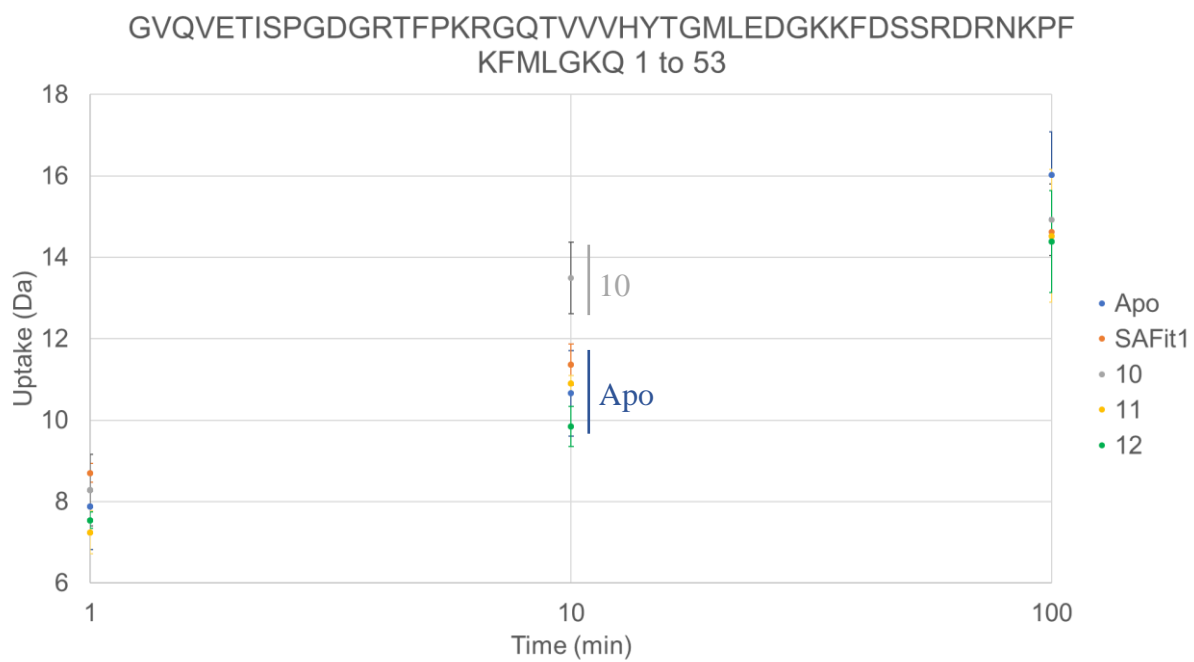

C)

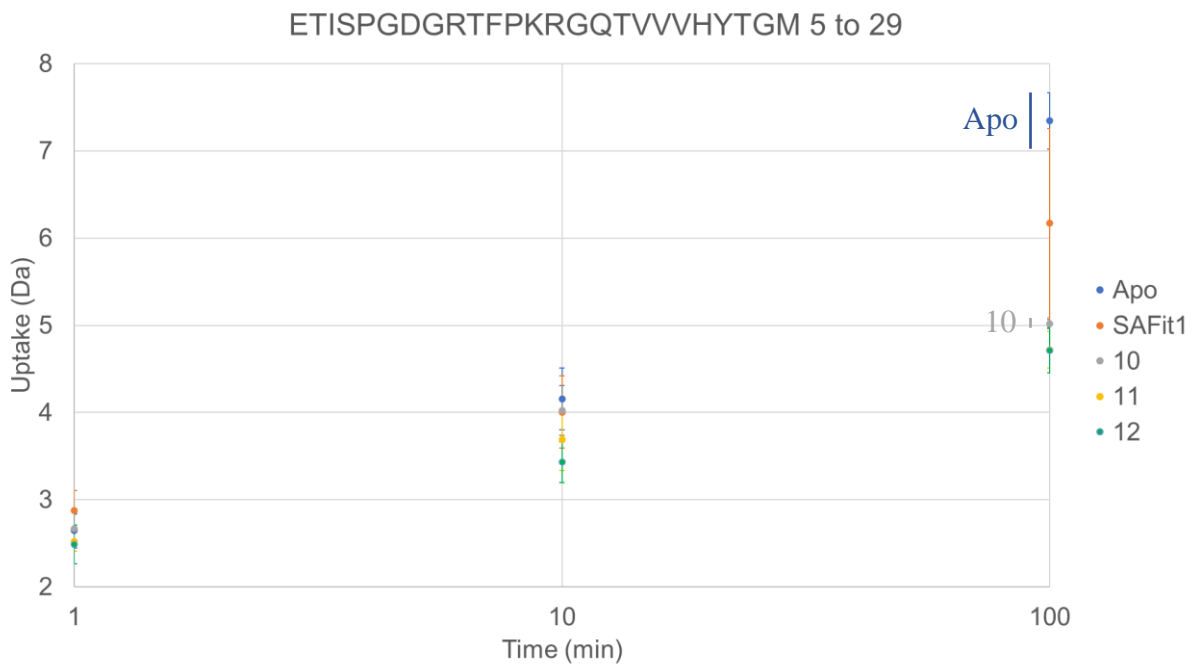

D)

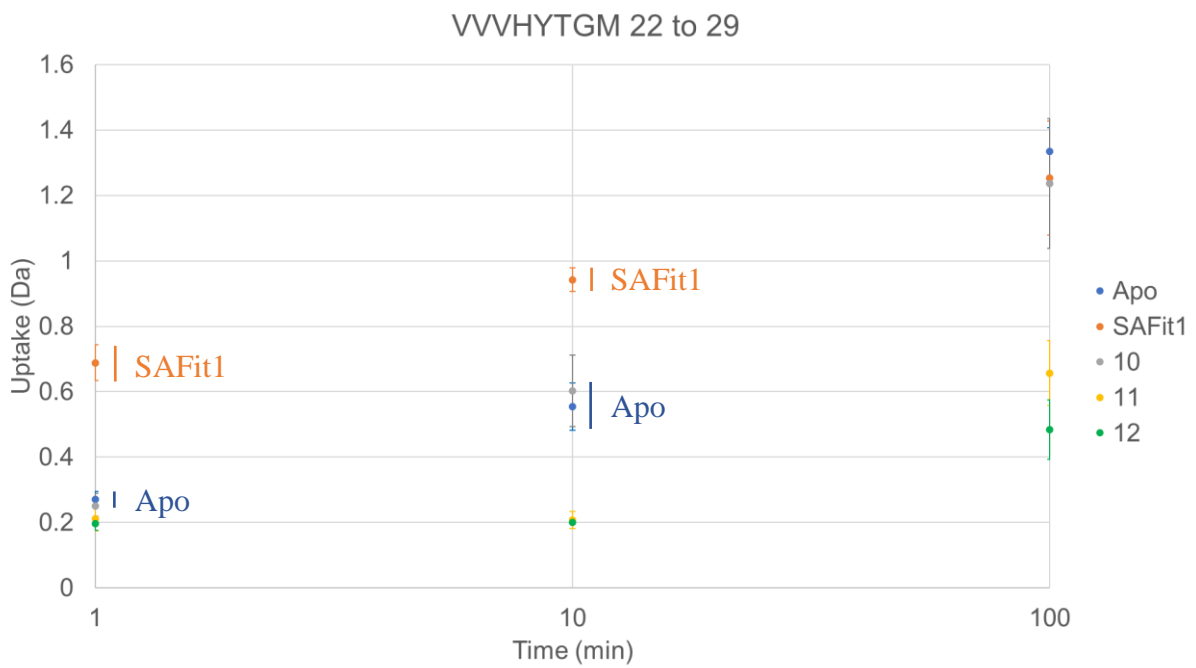



**E)**

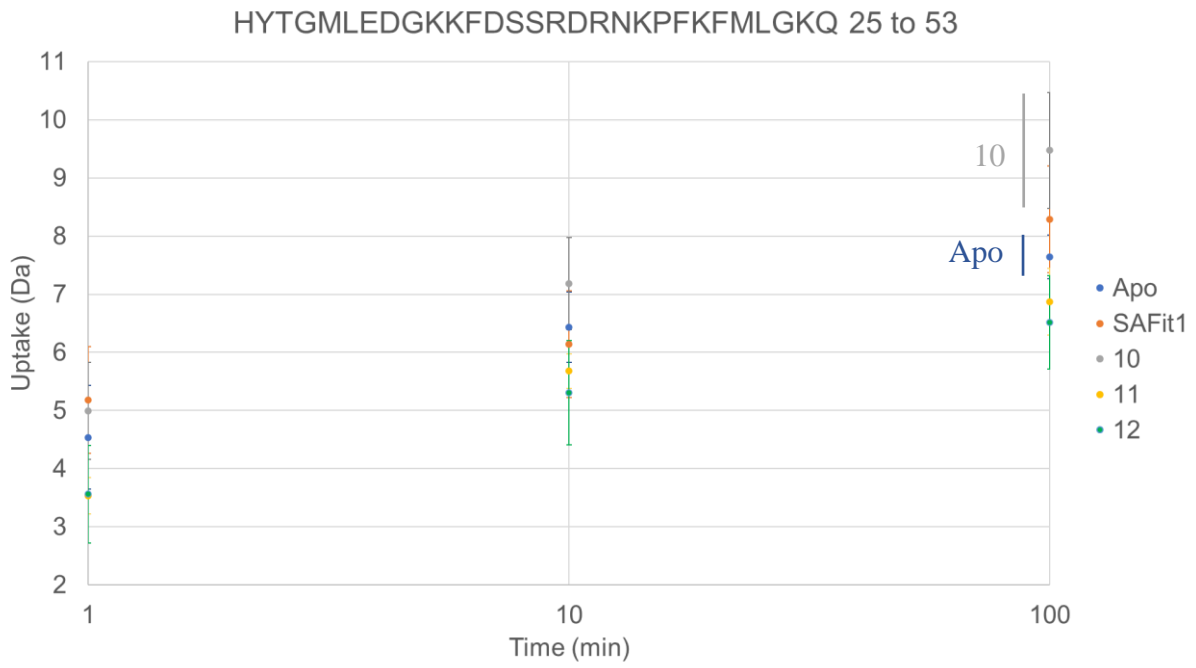

**F)**

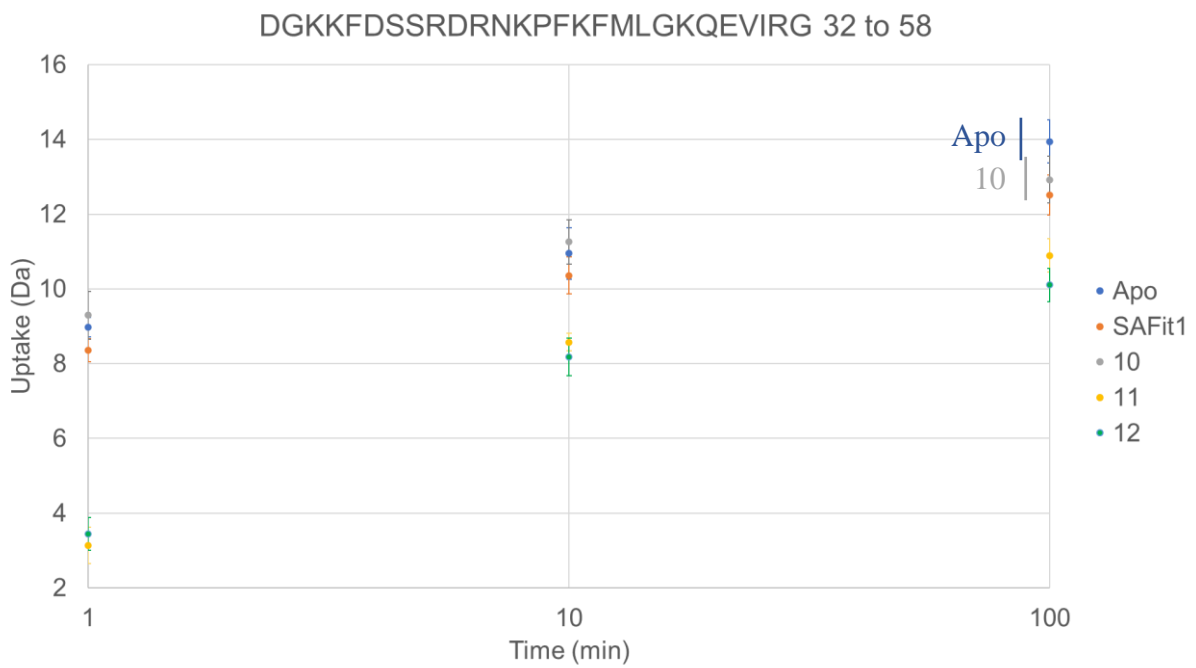

**G)**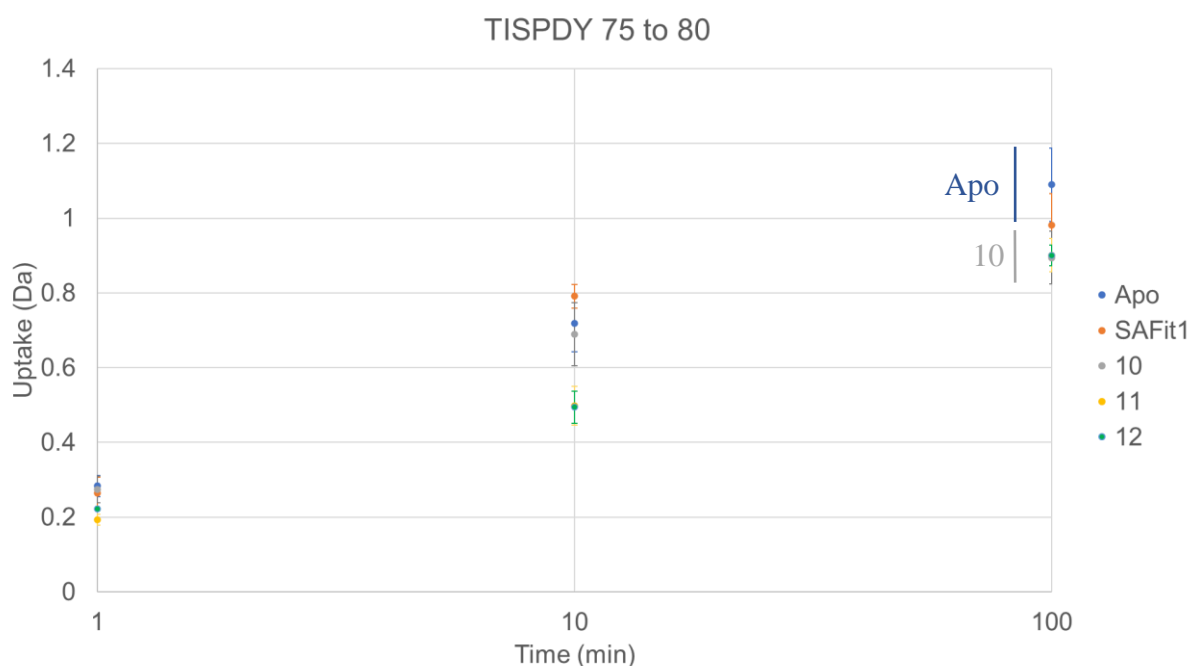**H)**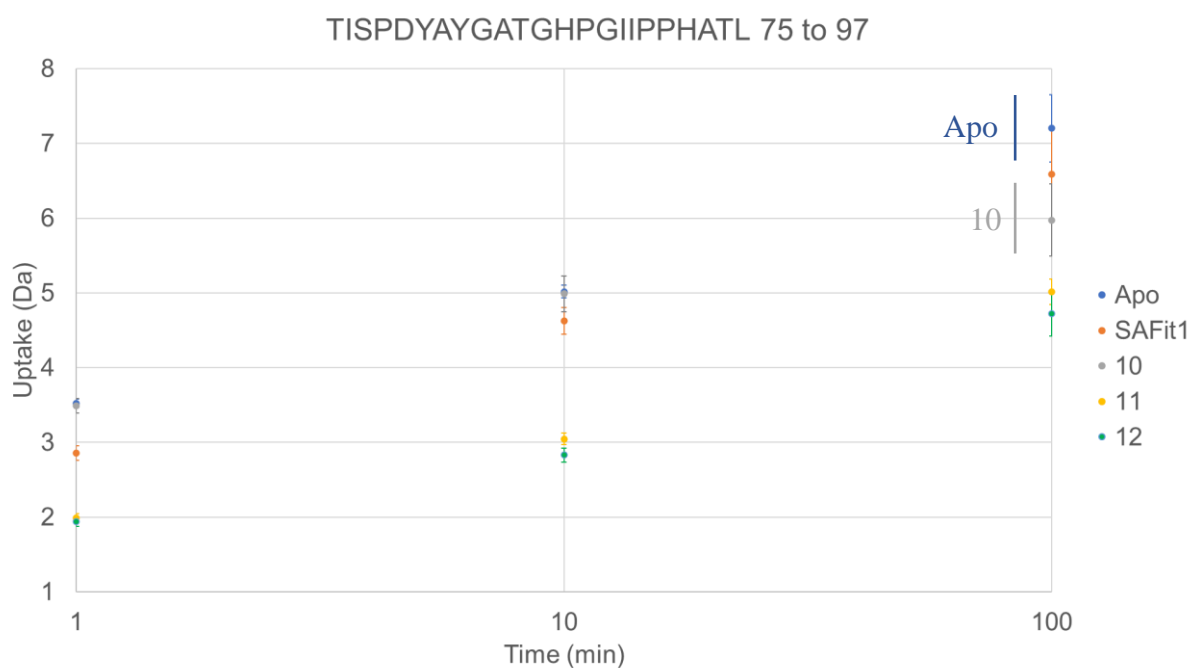

**SI Figure 15.** HDX measurements of FKBP12 without a ligand present (Apo, blue), with 11 (yellow), 10 (grey), SAFit1 (orange) or 12<sup>2,3</sup> (green, see A for chemical structures)). The deuterium uptake was measured at 1, 10 and 100 minutes exchange time. The sulfonamide ligands 11 and 12 induce a more closed conformation in multiple regions of FKBP12 (reflected by reduced deuterium uptake compared to the *apo* state, B-H). The sulfonimidamide 10 also shields parts of FKBP12 such as the 80s loop overhanging the FK506 binding site compared to the *apo* state (indicated by peptides in C and F-H). At the same time, 10 increases the susceptibility to HDX around the 30s loop indicated by a facilitated deuterium uptake of peptides in B (10-minute time point) and E (10- and 100-minute time points). An induction of solvent accessibility was observed for peptide V<sup>22</sup>-M<sup>29</sup> by the ligand SAFit1 (D; effect most visible at 1- and 10-minute time points), which is known to induce a more flexible conformation in FKBP12.<sup>4,5</sup>

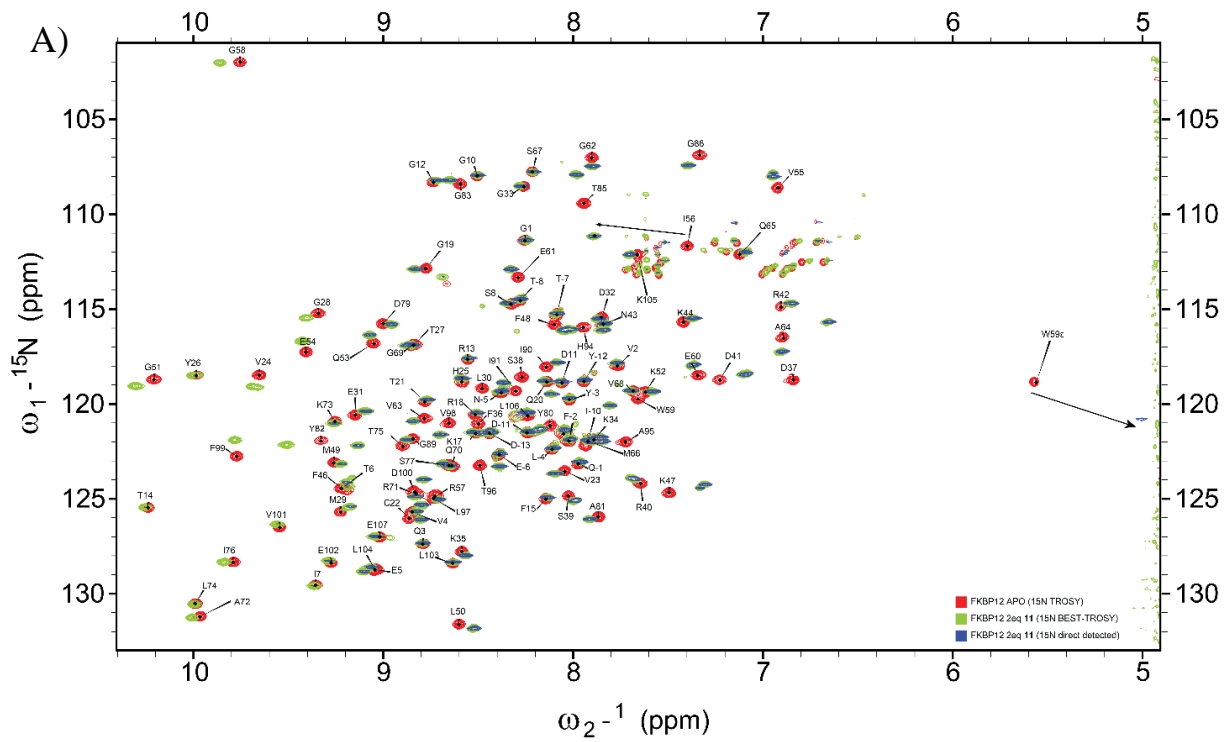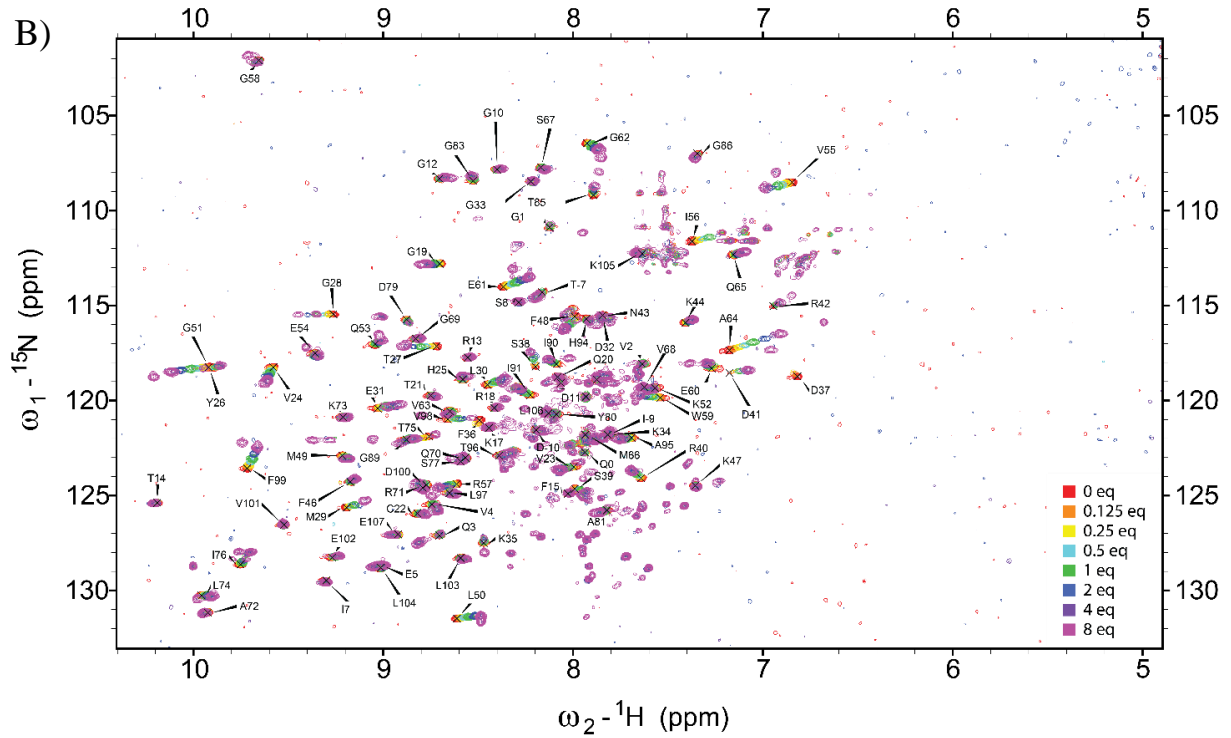

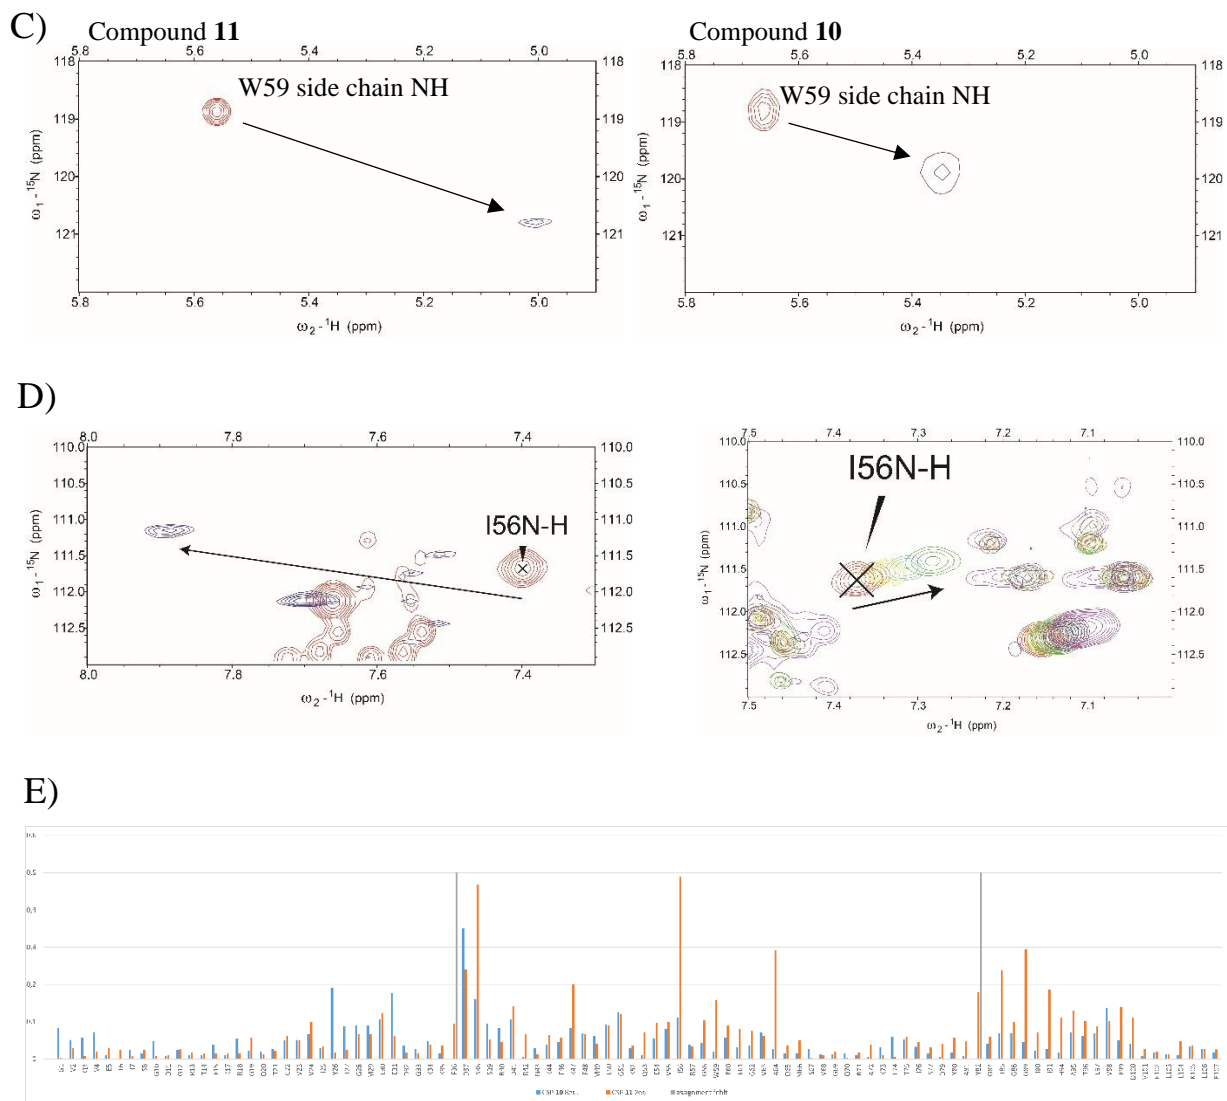

**SI Figure 16.** A)  $^1\text{H}$ ,  $^{15}\text{N}$  HSQC of FKBP12 with 2 eq. **11** (green and blue) overlaid with the FKBP12 apo spectrum (red). B)  $^1\text{H}$ ,  $^{15}\text{N}$  HSQC of FKBP12 titrated with 0-8 eq. **10** (red to purple). C) Zoom in on the signal of the Trp59 side chain NH. D) Zoom in on the signal of the Ile56 backbone NH. E) Bar diagram of the chemical shift perturbations of each backbone NH signal of FKBP12 with either 2 eq. **11** (orange) or 8 eq. **10** (blue). Grey bars indicate a missing signal.

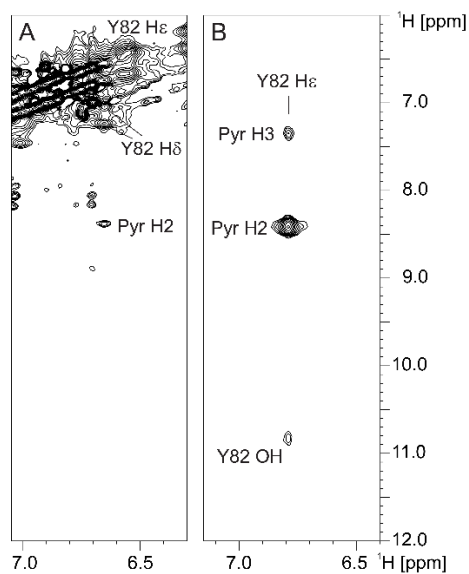

**SI Figure 17.** Expansions from NOESY spectra of FKBP12 complexes with **11** (A) and **10** (B), recorded at a temperature of 298 K using 0.5 mM samples of [ $u$ - $^{13}\text{C}/^{15}\text{N}$ ]-labeled FKBP12 with a two-fold excess of inhibitors in 25 mM phosphate buffer, pH7, containing 5%  $\text{D}_2\text{O}$ . Panel A shows a 2D  $F_2$ - $^{13}\text{C}$ -edited NOESY (800 MHz), recorded without  $^{13}\text{C}$ -decoupling in the indirect (vertical) dimension to allow a distinction between intra- and intermolecular NOEs. The spectrum shown in panel B is a  $F_1$ - $F_3$  plane from a 3D  $F_1$ - $^{13}\text{C}/^{15}\text{N}$ -filtered NOESY- $[^{13}\text{C},^1\text{H}]$ -HMQC (950 MHz), taken at the  $^{13}\text{C}$  chemical shift of Tyr82  $\text{C}^\epsilon$ . This experiment exclusively detects intermolecular NOEs. Exceptions are hydroxyl protons which escape the  $^{13}\text{C}/^{15}\text{N}$  filter due to the lack of a coupling. Note that in the **11** complex the Tyr82 OH is observable even at 298 K, indicating a strong hydrogen bond.

**SI Table 2.** Parameters of the performed FP Assays.

|                             | FKBP12 | FKBP12.6 | FKBP51FK1 | FKBP52FK1 | Ab-FBP (1-113) | paFKPA (23-253) |
|-----------------------------|--------|----------|-----------|-----------|----------------|-----------------|
| Protein concentration in nM | 1      | 10       | 15        | 10        | 8              | 40              |
| Tracer concentration in nM  | 0.5    | 1        | 1         | 1         | 1              | 1               |
| Tracer affinity in nM       | 0.3    | 1.7      | 5.7       | 4.1       | 3.3            | 18              |

**SI Table 3.** Refinement data of the cocrystal structures of FKBP12 with compounds **6a**, **5b** and **5a**.

| PDB entry                          | 8CHI                                                                               | 8CHJ                                                                                | 8CHK                                                                                 |
|------------------------------------|------------------------------------------------------------------------------------|-------------------------------------------------------------------------------------|--------------------------------------------------------------------------------------|
| Protein                            | FKBP12                                                                             | FKBP12                                                                              | FKBP12                                                                               |
| Ligand name                        | <b>6a</b>                                                                          | <b>5b</b>                                                                           | <b>5a</b>                                                                            |
| Ligand structure                   | 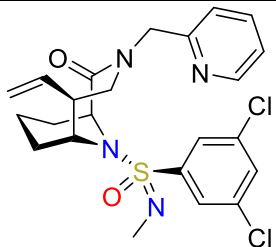 |  |  |
| Data collection                    |                                                                                    |                                                                                     |                                                                                      |
| Beamline                           | BESSY II (BL14.2)                                                                  | BESSY II (BL14.2)                                                                   | BESSY II (BL14.1)                                                                    |
| Wavelength                         | $\lambda = 0.9184 \text{ \AA}$                                                     | $\lambda = 0.9184 \text{ \AA}$                                                      | $\lambda = 0.9184 \text{ \AA}$                                                       |
| Space group                        | P 4 <sub>1</sub> 2 <sub>1</sub> 2                                                  | P 1 2 <sub>1</sub> 1                                                                | P 2 <sub>1</sub> 2 <sub>1</sub> 2 <sub>1</sub>                                       |
| Cell dimensions                    |                                                                                    |                                                                                     |                                                                                      |
| <i>a</i> , <i>b</i> , <i>c</i> (Å) | 69.36, 69.36, 129.85                                                               | 48.72, 80.12, 66.87                                                                 | 44.87, 53.42, 124.97                                                                 |
| $\alpha$ , $\beta$ , $\gamma$ (°)  | 90, 90, 90                                                                         | 90, 91.07, 90                                                                       | 90, 90, 90                                                                           |
| Resolution (Å)                     | 47.40-1.70 (1.73-1.70)                                                             | 48.71-1.70 (1.73-1.70)                                                              | 49.12-1.55 (1.58-1.55)                                                               |
| <i>R</i> <sub>merge</sub>          | 0.114 (1.776)                                                                      | 0.071 (1.007)                                                                       | 0.104 (1.501)                                                                        |
| <i>R</i> <sub>pim</sub>            | 0.032 (0.488)                                                                      | 0.045 (0.634)                                                                       | 0.066 (0.978)                                                                        |
| <i>I</i> / $\sigma$ ( <i>I</i> )   | 22.2 (2.2)                                                                         | 13.2 (1.7)                                                                          | 10.8 (1.1)                                                                           |

|                                       |               |               |               |
|---------------------------------------|---------------|---------------|---------------|
| CC1/2                                 | 1.000 (0.732) | 0.999 (0.711) | 0.998 (0.345) |
| Completeness (%)                      | 100.0 (100.0) | 99.7 (96.3)   | 98.9 (91.6)   |
| Redundancy                            | 25.7 (27.2)   | 6.7 (6.5)     | 6.1 (5.2)     |
| <b>Refinement</b>                     |               |               |               |
| Resolution (Å)                        | 47.40-1.70    | 48.71-1.70    | 49.12-1.55    |
| No. of reflections                    | 35656         | 56687         | 44070         |
| $R_{\text{work}}/R_{\text{free}}$ (%) | 18.8/22.2     | 19.2/21.2     | 20.8/24.0     |
| No. of atoms                          | 3713          | 7049          | 5459          |
| Average $B$ (Å <sup>2</sup> )         | 25.0          | 29.0          | 20.0          |
| R.m.s. deviations                     |               |               |               |
| Bond lengths (Å)                      | 0.0144        | 0.0119        | 0.0135        |
| Bond angles (°)                       | 1.799         | 1.664         | 1.731         |
| Ramachandran plot                     |               |               |               |
| Favoured (%)                          | 97.0          | 97.0          | 97.0          |
| Allowed (%)                           | 3.0           | 3.0           | 3.0           |
| Outlier (%)                           | 0.0           | 0.0           | 0.0           |

**SI Table 4.** Refinement data of the cocrystal structures of FKBP12 with compounds **1**, **4b** and FKBP51FK1 with compound **5a**.

| <b>PDB entry</b>                                        | <b>8CHL</b>                                                                       | <b>8CHM</b>                                                                        | <b>8CHN</b>                                                                         |
|---------------------------------------------------------|-----------------------------------------------------------------------------------|------------------------------------------------------------------------------------|-------------------------------------------------------------------------------------|
| <b>Protein</b>                                          | <b>FKBP12</b>                                                                     | <b>FKBP12</b>                                                                      | <b>FKBP51FK1</b>                                                                    |
| <b>Ligand name</b>                                      | <b>1</b>                                                                          | <b>4b</b>                                                                          | <b>5a</b>                                                                           |
| <b>Ligand structure</b>                                 | 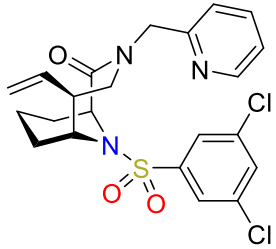 |  |  |
| <b>Data collection</b>                                  |                                                                                   |                                                                                    |                                                                                     |
| Beamline                                                | BESSY II (BL14.1)                                                                 | BESSY II (BL14.1)                                                                  | BESSY II (BL14.1)                                                                   |
| Wavelength                                              | $\lambda = 0.9184 \text{ \AA}$                                                    | $\lambda = 0.9184 \text{ \AA}$                                                     | $\lambda = 0.9184 \text{ \AA}$                                                      |
| Space group                                             | P 6 <sub>1</sub>                                                                  | P2 <sub>1</sub> 2 <sub>1</sub> 2 <sub>1</sub>                                      | P2 <sub>1</sub> 2 <sub>1</sub> 2 <sub>1</sub>                                       |
| Cell dimensions                                         |                                                                                   |                                                                                    |                                                                                     |
| <i>a</i> , <i>b</i> , <i>c</i> (Å)                      | 70.58, 70.58, 84.26                                                               | 35.59, 40.08, 91.21                                                                | 42.22, 54.05, 56.09                                                                 |
| $\alpha$ , $\beta$ , $\gamma$ (°)                       | 90, 90, 120                                                                       | 90, 90, 90                                                                         | 90, 90, 90                                                                          |
| Resolution (Å)                                          | 35.29-1.40 (1.42-1.40)                                                            | 45.61-1.12 (1.14-1.12)                                                             | 38.92-0.99 (1.01-0.99)                                                              |
| <i>R</i> <sub>merge</sub>                               | 0.073 (1.518)                                                                     | 0.032 (0.106)                                                                      | 0.037 (0.852)                                                                       |
| <i>R</i> <sub>pim</sub>                                 | 0.039 (1.052)                                                                     | 0.015 (0.056)                                                                      | 0.022 (0.524)                                                                       |
| <i>I</i> / $\sigma$ ( <i>I</i> )                        | 13.6 (0.8)                                                                        | 30.7 (14.8)                                                                        | 18.0 (1.9)                                                                          |
| CC1/2                                                   | 0.999 (0.313)                                                                     | 0.999 (0.996)                                                                      | 0.999 (0.683)                                                                       |
| Completeness (%)                                        | 99.8 (97.9)                                                                       | 99.7 (99.6)                                                                        | 99.8 (99.5)                                                                         |
| Redundancy                                              | 3.2 (1.8)                                                                         | 7.0 (7.2)                                                                          | 6.9 (6.6)                                                                           |
| <b>Refinement</b>                                       |                                                                                   |                                                                                    |                                                                                     |
| Resolution (Å)                                          | 35.29-1.40                                                                        | 45.61-1.12                                                                         | 38.92-0.99                                                                          |
| No. of reflections                                      | 46741                                                                             | 50866                                                                              | 71869                                                                               |
| <i>R</i> <sub>work</sub> / <i>R</i> <sub>free</sub> (%) | 19.5/22.3                                                                         | 14.2/15.2                                                                          | 19.7/20.3                                                                           |
| No. of atoms                                            | 3686                                                                              | 1949                                                                               | 2213                                                                                |



|                                |        |        |        |
|--------------------------------|--------|--------|--------|
| Average $B$ ( $\text{\AA}^2$ ) | 17.0   | 13.0   | 14.0   |
| R.m.s. deviations              |        |        |        |
| Bond lengths ( $\text{\AA}$ )  | 0.0134 | 0.0168 | 0.0139 |
| Bond angles ( $^\circ$ )       | 1.743  | 1.878  | 1.884  |
| Ramachandran plot              |        |        |        |
| Favoured (%)                   | 97.0   | 97.0   | 99.0   |
| Allowed (%)                    | 3.0    | 3.0    | 1.0    |
| Outlier (%)                    | 0.0    | 0.0    | 0.0    |

**SI Table 5.** Refinement data of the cocrystal structures of FKBP51FK1 with compounds **4b**, **6a** and **5b**.

| PDB entry                            | 8CHP                                                                                | 8CHQ                                                                                 | 8CHR                                                                                  |
|--------------------------------------|-------------------------------------------------------------------------------------|--------------------------------------------------------------------------------------|---------------------------------------------------------------------------------------|
| Protein                              | FKBP51FK1                                                                           | FKBP51FK1                                                                            | FKBP51FK1                                                                             |
| Ligand name                          | <b>4b</b>                                                                           | <b>6a</b>                                                                            | <b>5b</b>                                                                             |
| Ligand structure                     | 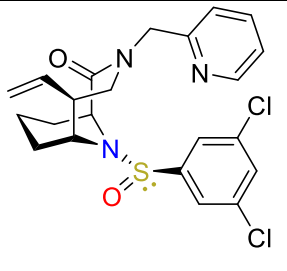 |  |  |
| Data collection                      |                                                                                     |                                                                                      |                                                                                       |
| Beamline                             | BESSY II (BL14.1)                                                                   | BESSY II (BL14.1)                                                                    | BESSY II (BL14.1)                                                                     |
| Wavelength                           | $\lambda = 0.9184 \text{ \AA}$                                                      | $\lambda = 0.9184 \text{ \AA}$                                                       | $\lambda = 0.9184 \text{ \AA}$                                                        |
| Space group                          | P2 <sub>1</sub> 2 <sub>1</sub> 2 <sub>1</sub>                                       | P2 <sub>1</sub> 2 <sub>1</sub> 2 <sub>1</sub>                                        | P2 <sub>1</sub> 2 <sub>1</sub> 2 <sub>1</sub>                                         |
| Cell dimensions                      |                                                                                     |                                                                                      |                                                                                       |
| $a, b, c$ ( $\text{\AA}$ )           | 42.31, 54.45, 56.41                                                                 | 42.35, 54.65, 56.65                                                                  | 42.13, 54.22, 56.01                                                                   |
| $\alpha, \beta, \gamma$ ( $^\circ$ ) | 90, 90, 90                                                                          | 90, 90, 90                                                                           | 90, 90, 90                                                                            |
| Resolution ( $\text{\AA}$ )          | 28.74-1.00 (1.02-1.00)                                                              | 39.33-1.01 (1.03-1.01)                                                               | 38.96-1.10 (1.12-1.10)                                                                |

|                                       |               |               |               |
|---------------------------------------|---------------|---------------|---------------|
| $R_{\text{merge}}$                    | 0.031 (0.363) | 0.029 (0.620) | 0.047 (1.104) |
| $R_{\text{pim}}$                      | 0.013 (0.162) | 0.017 (0.368) | 0.028 (0.656) |
| $I/\sigma(I)$                         | 26.3 (4.9)    | 25.4 (2.9)    | 16.0 (1.6)    |
| CC1/2                                 | 1.000 (0.923) | 1.000 (0.836) | 1.000 (0.632) |
| Completeness (%)                      | 100.0 (100.0) | 98.4 (96.3)   | 100.0 (100.0) |
| Redundancy                            | 7.0 (6.8)     | 7.1 (7.0)     | 7.1 (7.2)     |
| <b>Refinement</b>                     |               |               |               |
| Resolution (Å)                        | 28.74-1.00    | 39.33-1.01    | 38.96-1.10    |
| No. of reflections                    | 71000         | 68326         | 52743         |
| $R_{\text{work}}/R_{\text{free}}$ (%) | 18.3/19.9     | 15.7/17.2     | 17.2/20.1     |
| No. of atoms                          | 2227          | 2216          | 2155          |
| Average $B$ (Å <sup>2</sup> )         | 11.0          | 15.0          | 16.0          |
| R.m.s. deviations                     |               |               |               |
| Bond lengths (Å)                      | 0.0145        | 0.0101        | 0.0139        |
| Bond angles (°)                       | 1.903         | 1.683         | 1.893         |
| Ramachandran plot                     |               |               |               |
| Favoured (%)                          | 99.0          | 99.0          | 98.0          |
| Allowed (%)                           | 1.0           | 1.0           | 2.0           |
| Outlier (%)                           | 0.0           | 0.0           | 0.0           |

## Synthetic procedures

### General information

Air- and water-sensitive reactions were performed under argon atmosphere with commercially available dry solvents. All commercially available chemicals and solvents were used as received. Silica gel column chromatography was performed on silica (SiO<sub>2</sub>) from Macherey-Nagel (particle size 0.04-0.063 mm) with a mixture of cyclohexane and ethyl acetate (Cy/EA) as mobile phase. Thin-layer chromatography (TLC) was performed on pre-coated aluminium plates with a fluorescence indicator from Merck (silica gel 60 F<sub>254</sub>). <sup>1</sup>H-NMR and <sup>13</sup>C-NMR spectra were measured by the NMR Department of the Technical University Darmstadt, either on a 300 MHz Avance II spectrometer or a 500 MHz spectrometer DRX 500 from Bruker BioSpin GmbH. Chemical shifts are given in parts per million (ppm) and are referenced to residual solvents (<sup>1</sup>H-NMR: CDCl<sub>3</sub>, δ = 7.26 ppm; <sup>13</sup>C-NMR: CDCl<sub>3</sub>, δ = 77.16 ppm.). Coupling constants (*J*) are given in hertz (Hz). LC-MS (liquid chromatography – mass spectrometry) was performed on an Agilent 1260 Infinity II system with a Poroshell 120 EC-C18 1.9 μm, 2.1 x 50 mm column from Agilent. Eluents were 0.1 % formic acid in water (Eluent A) and 0.1 % formic acid in acetonitrile (Eluent B), the used method was 5 % B to 100 % B in 2 min. MS was recorded with an Agilent InfinityLab G6125B LC/MSD. High-resolution mass spectrometry (HRMS) was measured by the MS Department of the Technical University Darmstadt on a Bruker Daltonics Impact II mass spectrometer (quadrupole time-of-flight).

Compound **3**: (1*S*,5*S*,6*R*)-10-((3,5-dichlorophenyl)thio)-3-(pyridin-2-ylmethyl)-5-vinyl-3,10-diazabicyclo[4.3.1]decan-2-one

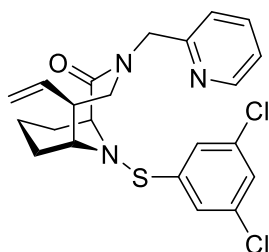

3,5-Dichlorobenzenethiol (105 mg, 586 μmol, 1.0 eq.) was wetted with acetic acid (32 μL, 560 μmol, 1.0 eq.) and cooled to -40 °C. Sulfuryl chloride (100 μL, 1237 μmol, 2.1 eq.) was added and the reaction mixture was allowed to warm to room temperature without stirring. At room temperature, the reaction mixture was completely liquid. Coproducts were removed *in vacuo* to give the crude sulfenyl chloride. (1*S*,5*R*,6*R*)-3-(pyridin-2-ylmethyl)-5-vinyl-3,10-diazabicyclo[4.3.1]decan-2-one **2** (95 mg, 350 μmol, 0.6 eq.) was dissolved in MeCN (20 mL) under argon atmosphere. DIPEA (300 μL, 1764 μmol, 3.0 eq.) was added and the reaction mixture was cooled to 0 °C. The crude sulfenyl chloride was dissolved in a small amount of MeCN and added to the reaction mixture. The solution was allowed to warm to room temperature and stirred for 19 h under argon atmosphere. The reaction was quenched with water and extracted with DCM. The organic phase was dried over MgSO<sub>4</sub>, filtered and concentrated *in vacuo*. The crude product was purified by column chromatography (Cy/EA 2:1) to afford **3**.

Yield: 87 mg, 55 %

Purity: 88 % (HPLC, UV-absorption 220 nm)

TLC: R<sub>f</sub> = 0.42 (Cy/EA 1:1)

HR-MS (ESI): *m/z* calculated for sum formula C<sub>22</sub>H<sub>23</sub>Cl<sub>2</sub>N<sub>3</sub>OS: [M+H]<sup>+</sup> = 448.10117, found: [M+H]<sup>+</sup> = 448.10139, error: 0.22 mDa or 0.50 ppm

<sup>1</sup>H-NMR (300 MHz, CDCl<sub>3</sub>): δ = 1.52–1.74 (m, 3H), 1.85–2.07 (m, 2H), 2.38 (d, 1H, *J* = 13.5 Hz), 2.66–2.81 (m, 1H), 3.09–3.17 (m, 1H), 3.21 (dd, 1H, *J* = 14.4/1.8 Hz), 3.92–4.07 (m, 2H), 4.76–5.00 (m, 4H), 5.54–5.70 (m, 1H), 7.10 (s, 3H), 7.21 (dd, 1H, *J* = 7.4/5.3 Hz), 7.35 (d, 1H, *J* = 7.9 Hz), 7.69 (ddd, 1H, *J* = 7.7/7.7/1.7 Hz), 8.55 (d, 1H, *J* = 4.7 Hz) ppm.

<sup>13</sup>C-NMR (75 MHz, CDCl<sub>3</sub>): δ = 15.4, 28.6, 29.7, 50.1, 51.8, 56.3, 65.7, 69.0, 116.2, 120.4, 122.3, 122.6, 125.6, 135.8, 137.1, 138.5, 146.3, 149.3, 157.5, 173.4 ppm.

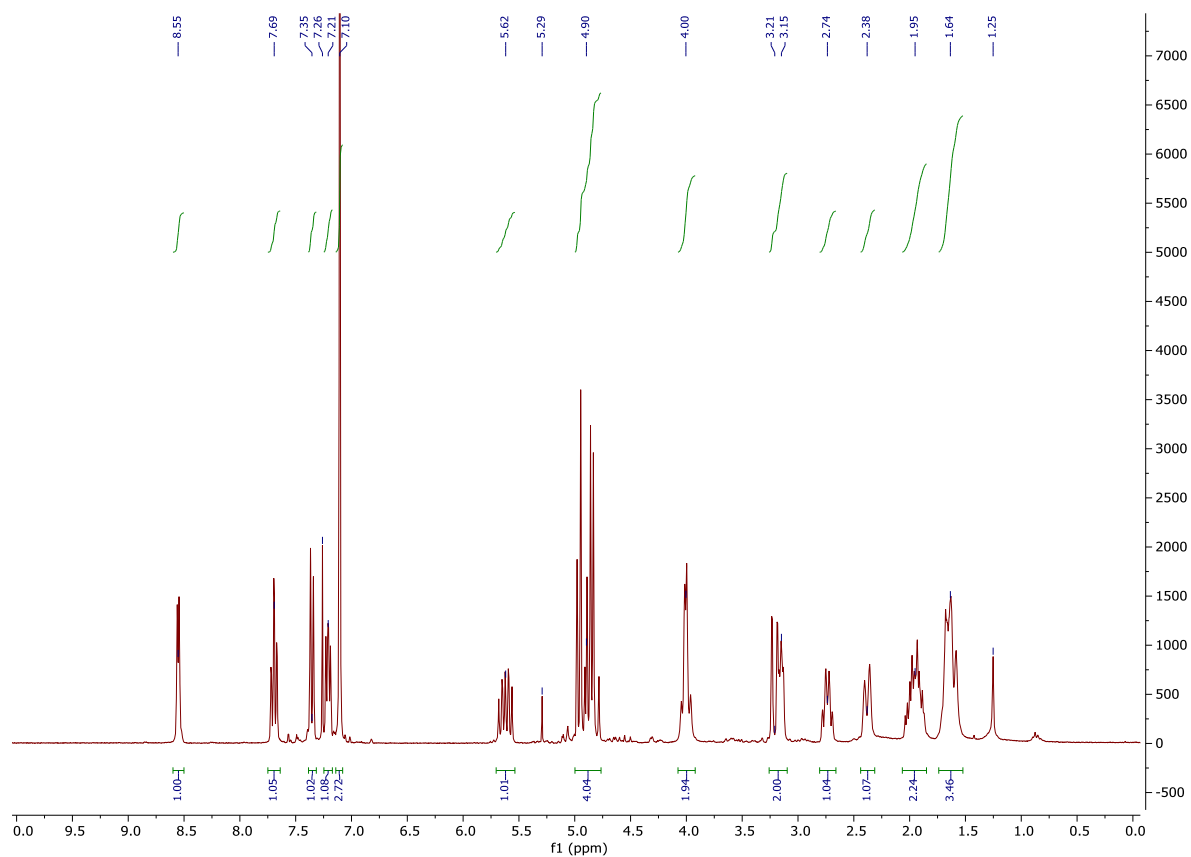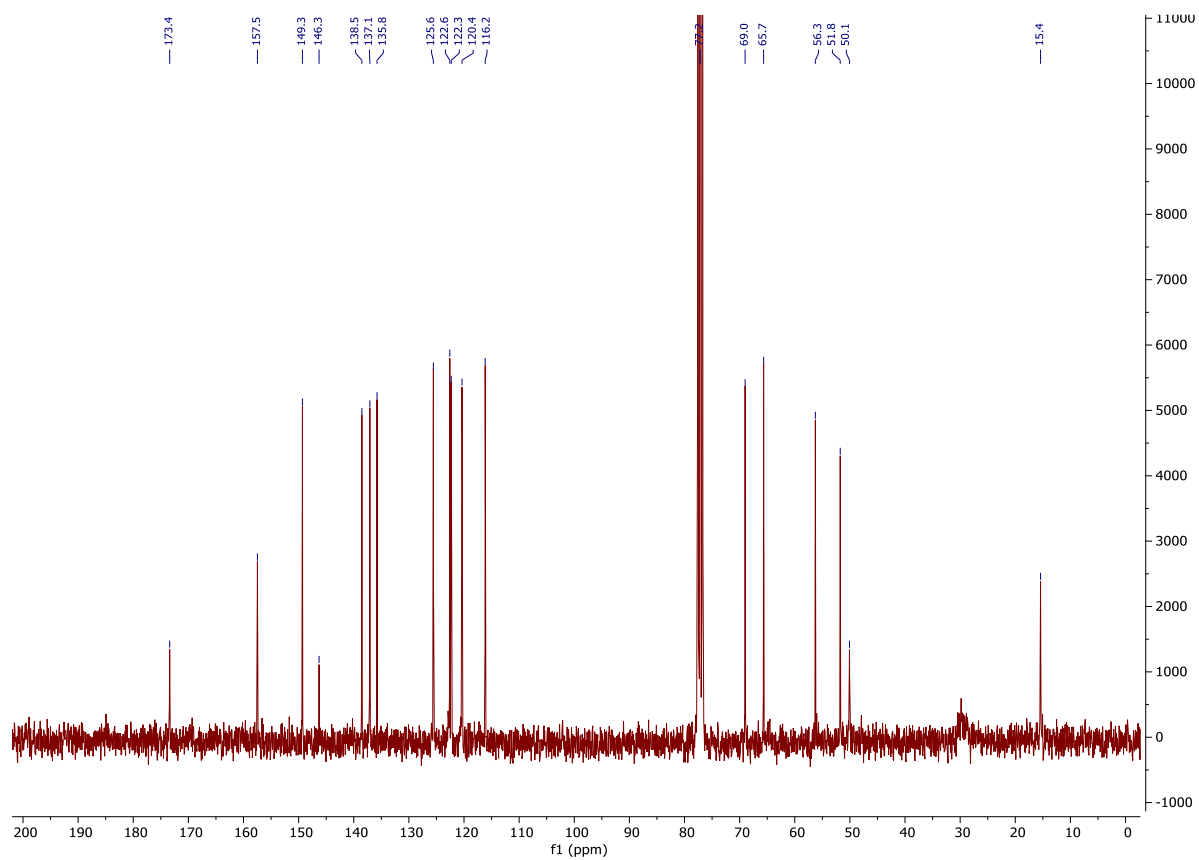

Compound **4a** and **4b**: (1*S*,5*S*,6*R*)-10-((*R*)-(3,5-dichlorophenyl)sulfinyl)-3-(pyridin-2-ylmethyl)-5-vinyl-3,10-diazabicyclo[4.3.1]decan-2-one and (1*S*,5*S*,6*R*)-10-((*S*)-(3,5-dichlorophenyl)sulfinyl)-3-(pyridin-2-ylmethyl)-5-vinyl-3,10-diazabicyclo[4.3.1]decan-2-one

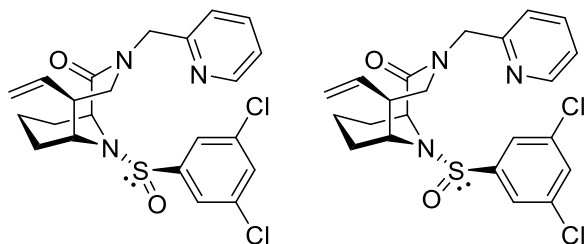

KF (12.1 mg, 210  $\mu\text{mol}$ , 1.9 eq.) and mCPBA (70 %, wet with water, 44.6 mg, 181  $\mu\text{mol}$ , 1.7 eq.) were dissolved in MeCN/H<sub>2</sub>O 5:1 (5 mL) and cooled to 0 °C. After stirring for 30 min at 0 °C, sulfenamide **3** (49 mg, 109  $\mu\text{mol}$ , 1.0 eq.) was added to the reaction. The mixture was stirred at 0 °C for 4.5 h, then sat. aq. NaHCO<sub>3</sub> was added and it was extracted with EA. The organic phase was dried over MgSO<sub>4</sub>, filtered and concentrated *in vacuo*. The crude product was purified by column chromatography (Cy/EA 1:2) to afford both diastereomers **4a** and **4b**.

**4b**:

Yield: 2.4 mg, 5 %

Purity: 93 % (HPLC, UV-absorption 220 nm)

Appearance: colourless solid

TLC: R<sub>f</sub> = 0.44 (Cy/EA 1:1)

HR-MS (ESI): m/z calculated for sum formula C<sub>22</sub>H<sub>23</sub>Cl<sub>2</sub>N<sub>3</sub>O<sub>2</sub>S: [M+H]<sup>+</sup> = 464.09608, found: [M+H]<sup>+</sup> = 464.09640, error: 0.32 mDa or 0.69 ppm

<sup>1</sup>H-NMR (500 MHz, CDCl<sub>3</sub>):  $\delta$  = 1.48–1.61 (m, 2H), 1.61–1.78 (m, 2H), 1.82–1.92 (m, 1H), 2.39 (d, 1H, *J* = 13.5 Hz), 2.69–2.77 (m, 1H), 3.21 (d, 1H, *J* = 13.8 Hz), 3.37–3.43 (m, 1H), 4.22 (dd, 1H, *J* = 13.9/10.8 Hz), 4.38 (d, 1H, *J* = 6.0 Hz), 4.88 (d, 1H, *J* = 15.5 Hz), 4.97–5.11 (m, 3H), 5.61–5.71 (m, 1H), 7.38–7.46 (m, 2H), 7.48 (t, 1H, *J* = 1.8 Hz), 7.54 (d, 2H, *J* = 1.9 Hz), 7.87–7.96 (m, 1H), 8.58 (d, 1H, *J* = 5.0 Hz) ppm.

<sup>13</sup>C-NMR (125 MHz, CDCl<sub>3</sub>):  $\delta$  = 15.9, 27.5, 29.8, 48.9, 52.9, 57.7, 59.6, 117.1, 123.7, 123.8, 124.5, 131.7, 136.4, 137.0, 147.3, 171.8 ppm.

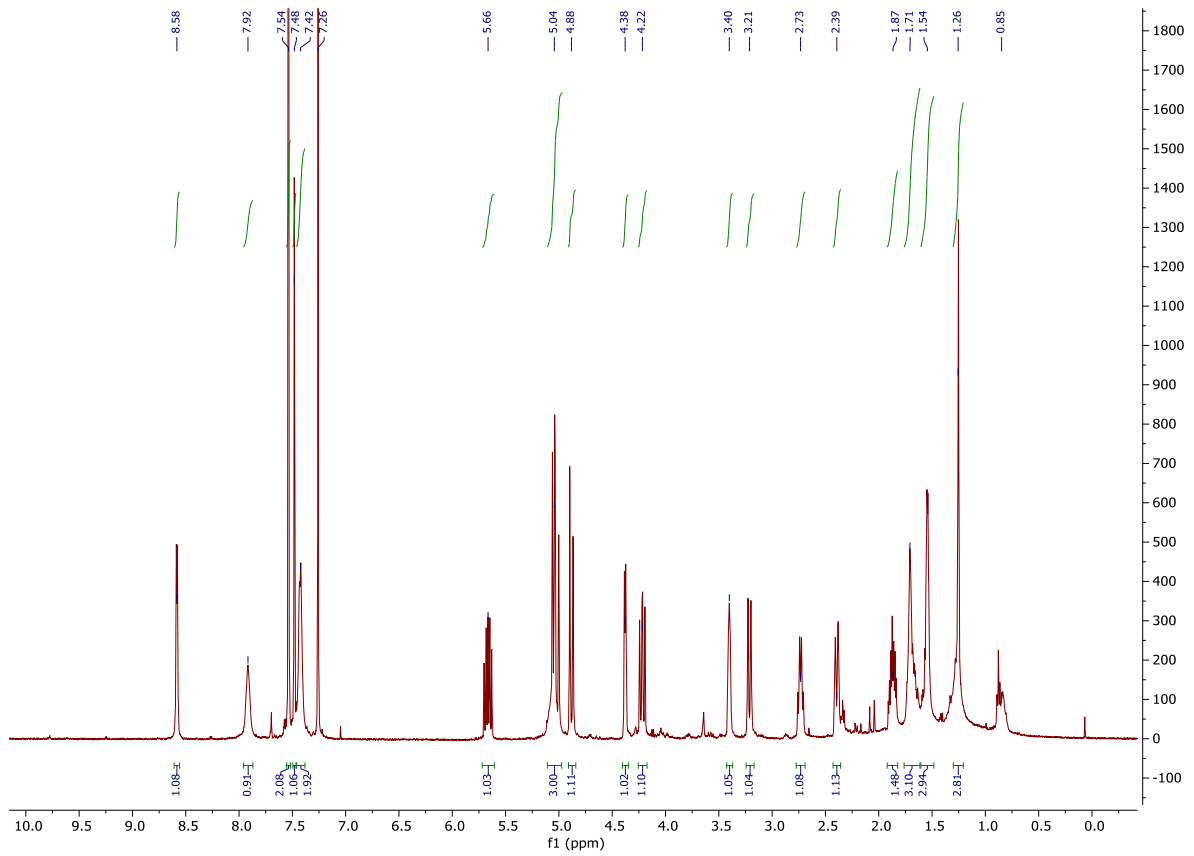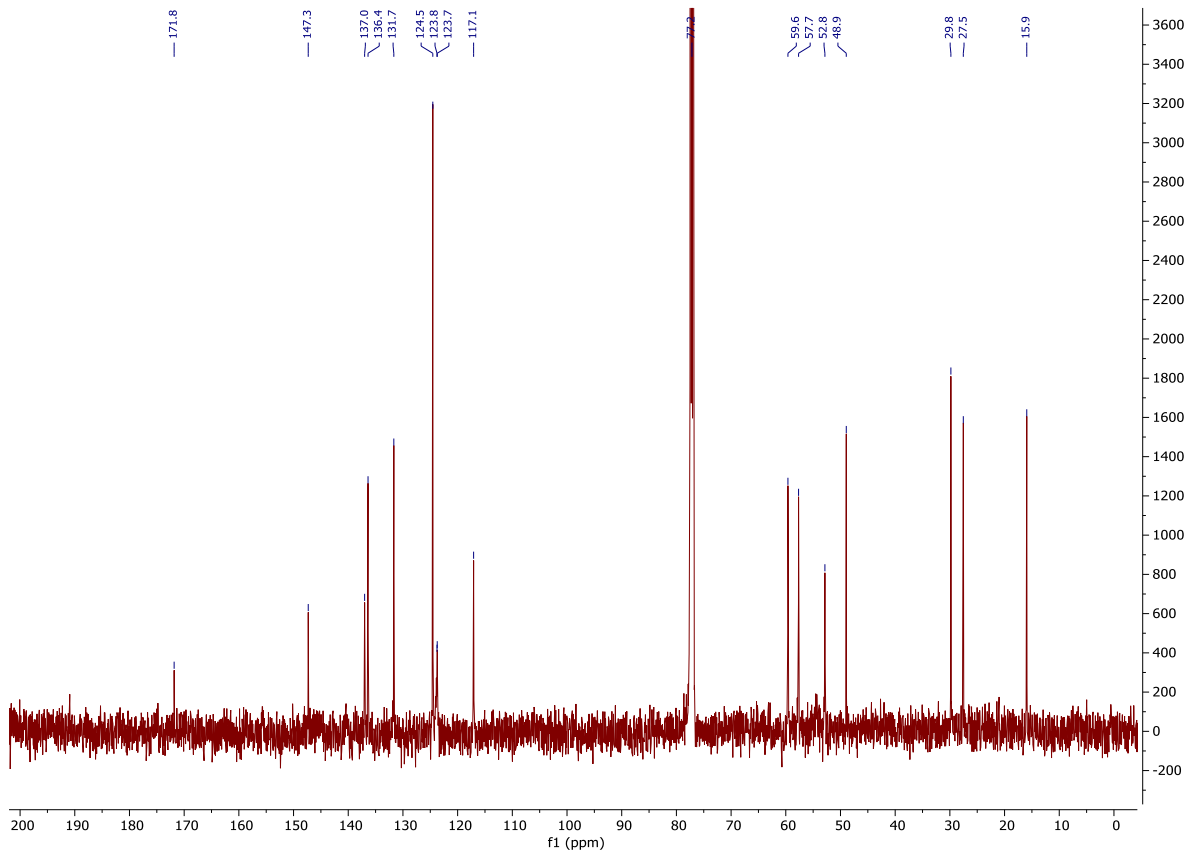

4a:

Yield: 3.6 mg, 7 %

Purity: 92 % (HPLC, UV-absorption 220 nm)

Appearance: colourless solid

TLC:  $R_f = 0.41$  (Cy/EA 1:2)

HR-MS (ESI): calculated for sum formula  $C_{22}H_{23}Cl_2N_3O_2S$ :  $[M+H]^+ = 464.09608$ , found:  $[M+H]^+ = 464.09663$ , error: 0.55 mDa or 1.18 ppm

$^1H$ -NMR (500 MHz,  $CDCl_3$ ):  $\delta = 1.46$ – $1.59$  (m, 1H),  $1.65$ – $1.74$  (m, 3H),  $1.77$ – $1.90$  (m, 1H),  $2.27$  (d, 1H,  $J = 13.4$  Hz),  $2.67$ – $2.78$  (m, 1H),  $3.09$  (dd, 1H,  $J = 14.1/1.7$  Hz),  $3.58$ – $3.65$  (m, 1H),  $4.04$  (dd, 1H,  $J = 13.9/11.2$  Hz),  $4.17$  (d, 1H,  $J = 5.9$  Hz),  $4.85$  (d, 1H,  $J = 15.7$  Hz),  $4.91$  (d, 1H,  $J = 17.0$  Hz),  $4.98$  (d, 1H,  $J = 10.2$  Hz),  $5.01$ – $5.10$  (m, 1H),  $5.35$ – $5.46$  (m, 1H),  $7.30$ – $7.38$  (m, 1H),  $7.49$  (t, 1H,  $J = 1.9$  Hz),  $7.50$ – $7.55$  (m, 1H),  $7.56$  (d, 2H,  $J = 1.9$  Hz),  $7.83$ – $7.92$  (m, 1H),  $8.57$  (d, 1H,  $J = 4.8$  Hz) ppm.

$^{13}C$ -NMR (125 MHz,  $CDCl_3$ ):  $\delta = 16.0, 28.7, 29.2, 48.7, 52.8, 55.2, 57.9, 58.6, 116.8, 123.2, 124.6, 131.6, 136.3, 137.3, 147.4, 156.3, 171.8$  ppm.

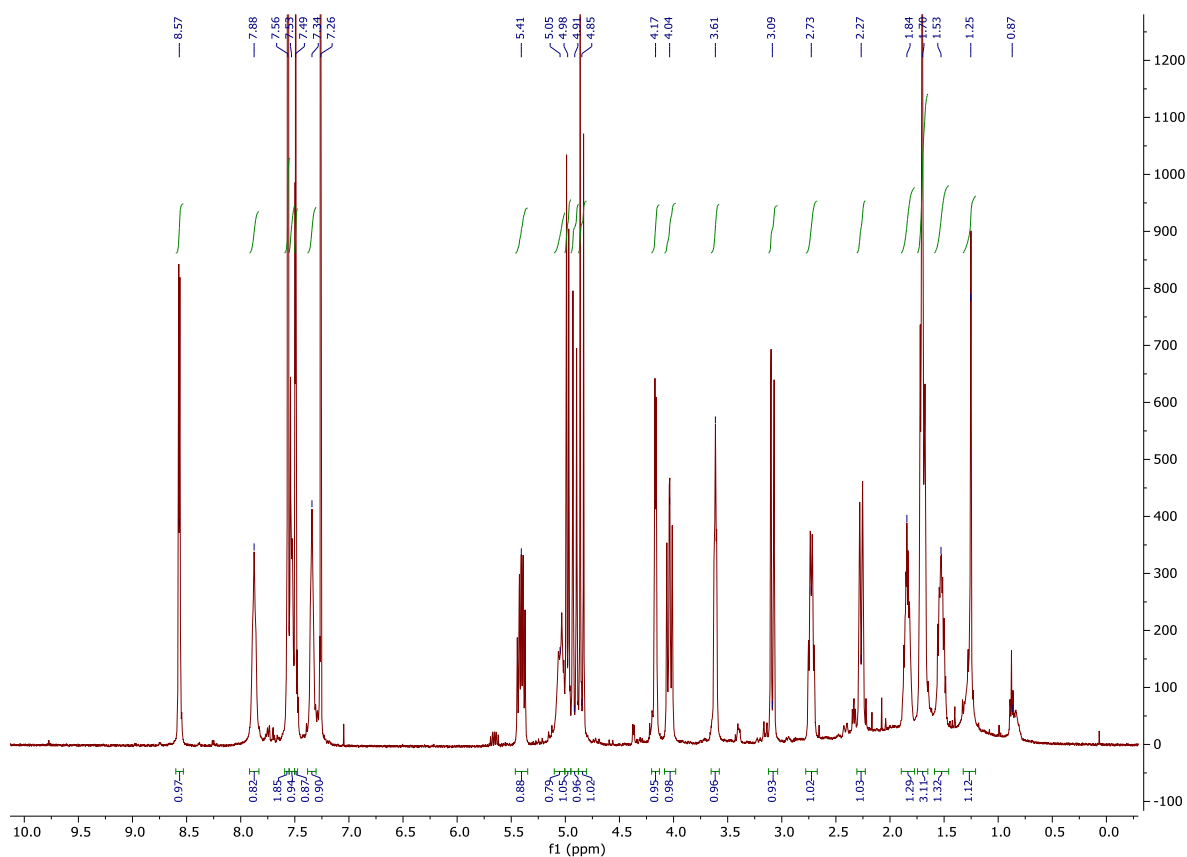

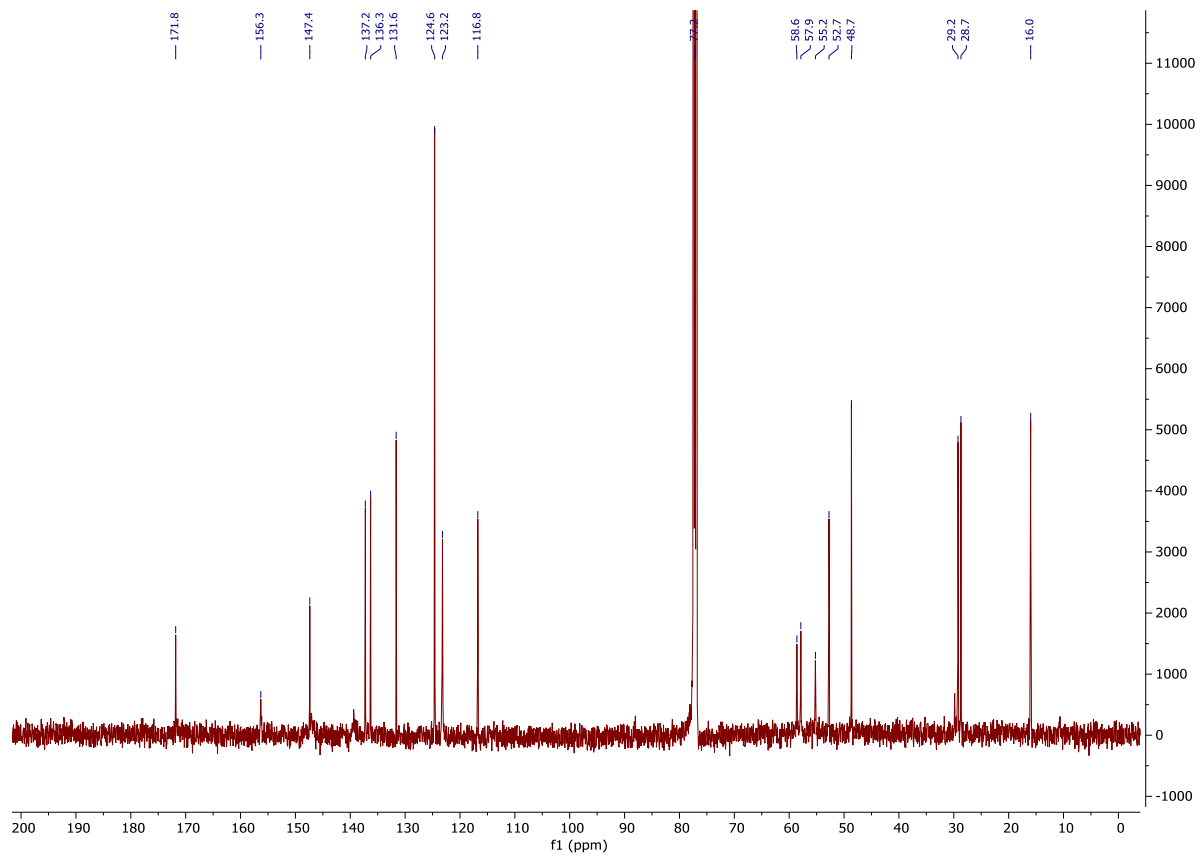



Compound **5a** and **5b**: (1*S*,5*S*,6*R*)-10-((*S*)-(3,5-dichlorophenyl)sulfonimidoyl)-3-(pyridin-2-ylmethyl)-5-vinyl-3,10-diazabicyclo[4.3.1]decan-2-one and (1*S*,5*S*,6*R*)-10-((*R*)-(3,5-dichlorophenyl)sulfonimidoyl)-3-(pyridin-2-ylmethyl)-5-vinyl-3,10-diazabicyclo[4.3.1]decan-2-one

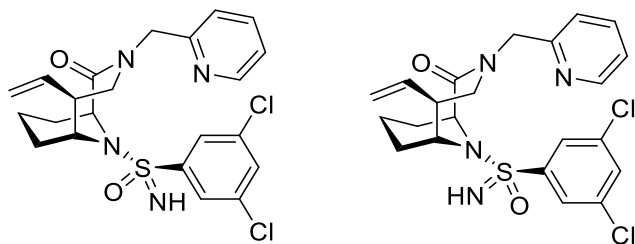

Sulfenamide **3** (130 mg, 290  $\mu$ mol, 1.0 eq.), (Diacetoxyiodo)benzene (305 mg, 947  $\mu$ mol, 3.3 eq.) and ammonium acetate (104 mg, 1350  $\mu$ mol, 4.7 eq.) were dissolved in MeOH (8 mL) and stirred at room temperature. After 19 h, water was added and the mixture was extracted with DCM. The organic phase was dried over  $\text{MgSO}_4$ , filtered and concentrated *in vacuo*. The crude product was purified by column chromatography (Cy/EA 1:2) to afford pure diastereomers **5a** and **5b**.

**5a**:

Yield: 36 mg, 26 %

Purity: 96 % (HPLC, UV-absorption 220 nm)

Appearance: colourless solid

TLC:  $R_f$  = 0.26 (Cy/EA 1:2)

HR-MS (ESI):  $m/z$  calculated for sum formula  $\text{C}_{22}\text{H}_{24}\text{Cl}_2\text{N}_4\text{O}_2\text{S}$ :  $[\text{M}+\text{H}]^+ = 479.10698$ , found:  $[\text{M}+\text{H}]^+ = 479.10704$ , error: 0.06 mDa or 0.13 ppm

$^1\text{H-NMR}$  (500 MHz,  $\text{CDCl}_3$ ):  $\delta$  = 1.13–1.23 (m, 1H), 1.27–1.36 (m, 1H), 1.50–1.53 (m, 1H), 1.53–1.61 (m, 1H), 2.22–2.29 (m, 1H), 2.63–2.73 (m, 1H), 3.13 (dd, 1H,  $J = 14.0/1.5$  Hz), 3.38 (dd, 1H,  $J = 14.0/10.8$  Hz), 4.26–5.33 (m, 1H), 4.81–4.84 (m, 2H), 4.84–4.87 (m, 1H), 5.00 (d, 1H,  $J = 17.1$  Hz), 5.05 (d, 1H,  $J = 10.2$  Hz), 5.64–5.75 (m, 1H), 7.22–7.26 (m, 1H), 7.37 (d, 1H,  $J = 7.9$  Hz), 7.52 (t, 1H,  $J = 1.8$  Hz), 7.74 (dd, 1H,  $J = 7.7/7.7$  Hz), 7.80 (d, 1H,  $J = 1.8$  Hz), 8.53 (d, 1H,  $J = 4.7$  Hz) ppm.

$^{13}\text{C-NMR}$  (125 MHz,  $\text{CDCl}_3$ ):  $\delta$  = 15.8, 26.7, 27.7, 48.9, 52.4, 55.1, 55.9, 57.0, 116.8, 122.6, 122.9, 125.3, 132.3, 136.2, 137.4, 137.9, 146.2, 148.5, 156.9, 171.2 ppm.

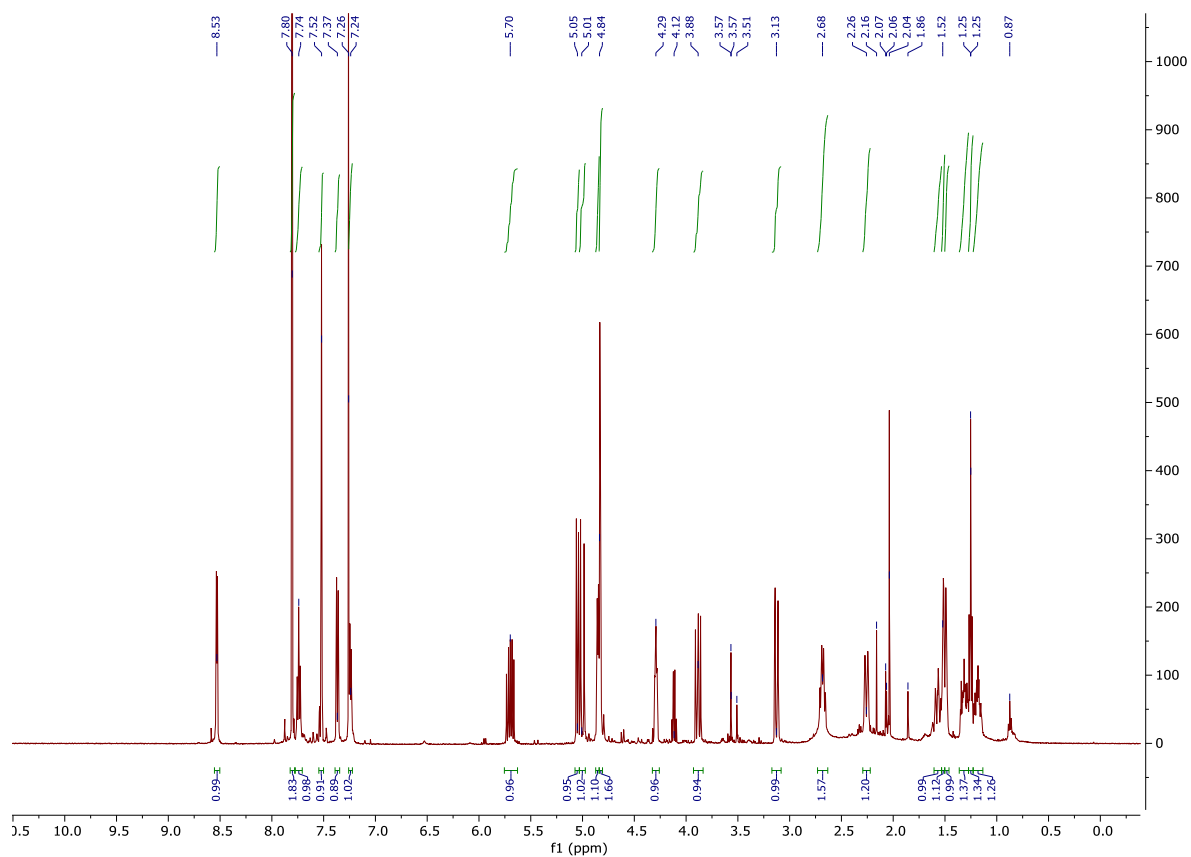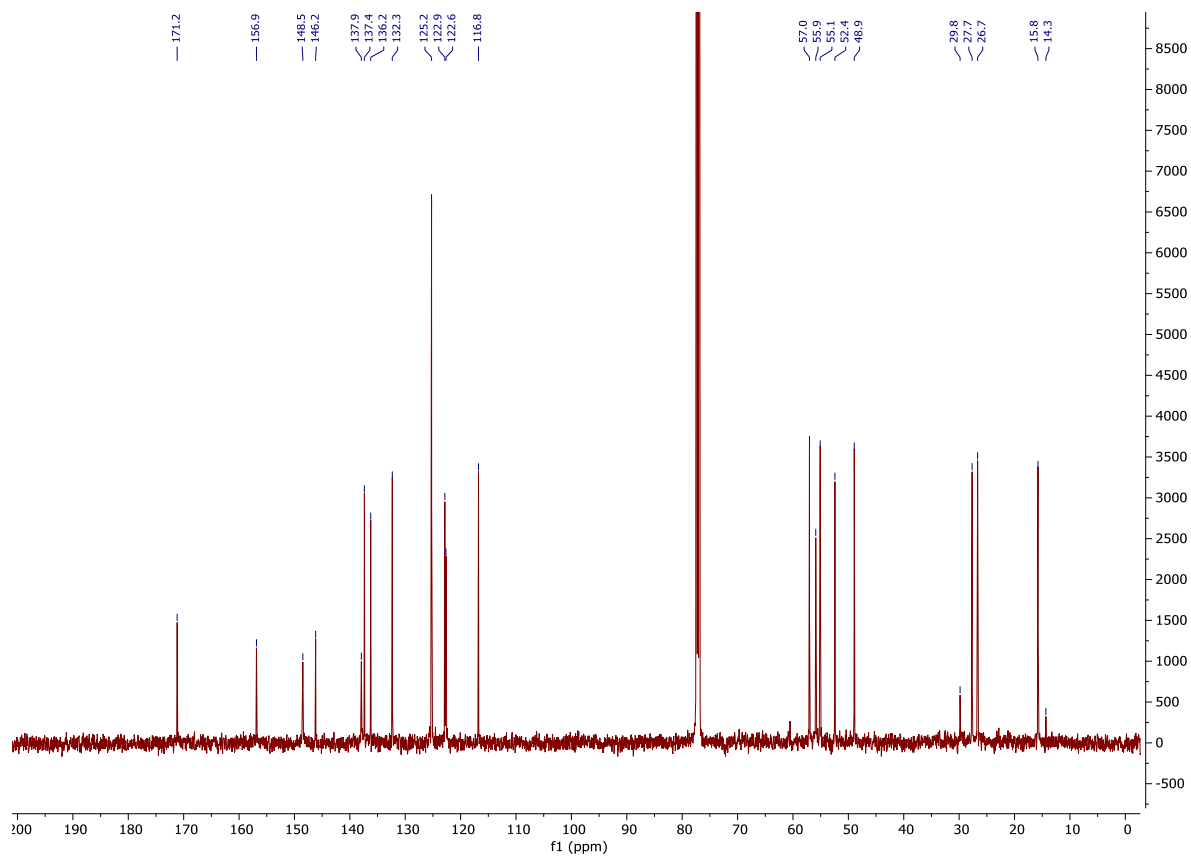

5b:

Yield: 53 mg, 35 %

Purity: 98 % (HPLC, UV-absorption 220 nm)

Appearance: colourless solid

TLC:  $R_f = 0.17$  (Cy/EA 1:2)

HR-MS (ESI):  $m/z$  calculated for sum formula  $C_{22}H_{24}Cl_2N_4O_2S$ :  $[M+H]^+ = 479.10698$ , found:  $[M+H]^+ = 479.10739$ , error: 0.38 mDa or 0.83 ppm

$^1H$ -NMR (500 MHz,  $CDCl_3$ ):  $\delta = 1.15$ – $1.23$  (m, 1H),  $1.27$ – $1.35$  (m, 1H),  $1.45$ – $1.52$  (m, 1H),  $1.52$ – $1.56$  (m, 1H),  $1.56$ – $1.63$  (m, 1H),  $2.23$ – $2.31$  (m, 1H),  $2.72$ – $2.80$  (m, 1H),  $3.01$  (dd, 1H,  $J = 14.1/1.6$  Hz),  $4.06$ – $4.11$  (m, 1H),  $4.11$ – $4.15$  (m, 1H),  $4.41$  (d, 1H,  $J = 15.7$  Hz),  $4.87$ – $4.92$  (m, 1H),  $5.01$ – $5.07$  (m, 2H),  $5.30$  (d, 1H,  $J = 15.7$  Hz),  $5.70$ – $5.80$  (m, 1H),  $7.72$  (dd, 1H,  $J = 7.5/5.3$  Hz),  $7.27$  (d, 1H,  $J = 8.0$  Hz),  $7.50$  (t, 1H,  $J = 1.9$  Hz),  $7.69$  (ddd, 1H,  $J = 7.8/7.7/1.7$  Hz),  $7.85$  (d, 1H,  $J = 1.9$  Hz),  $8.55$  (d, 1H,  $J = 5.0$  Hz) ppm.

$^{13}C$ -NMR (125 MHz,  $CDCl_3$ ):  $\delta = 15.7, 26.4, 27.3, 49.0, 53.4, 54.9, 56.0, 57.7, 116.8, 122.4, 122.7, 125.0, 132.0, 136.1, 137.4, 137.6, 146.1, 149.0, 156.4, 172.5$  ppm.

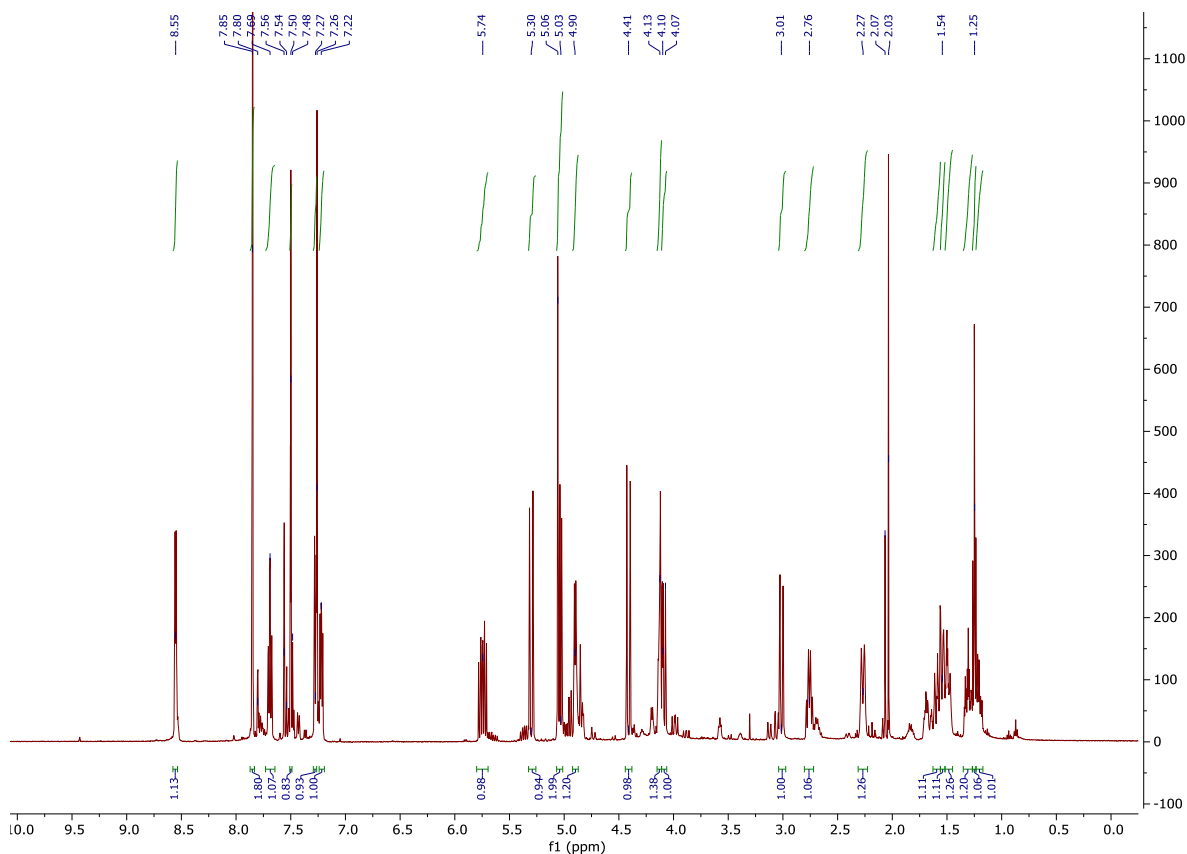

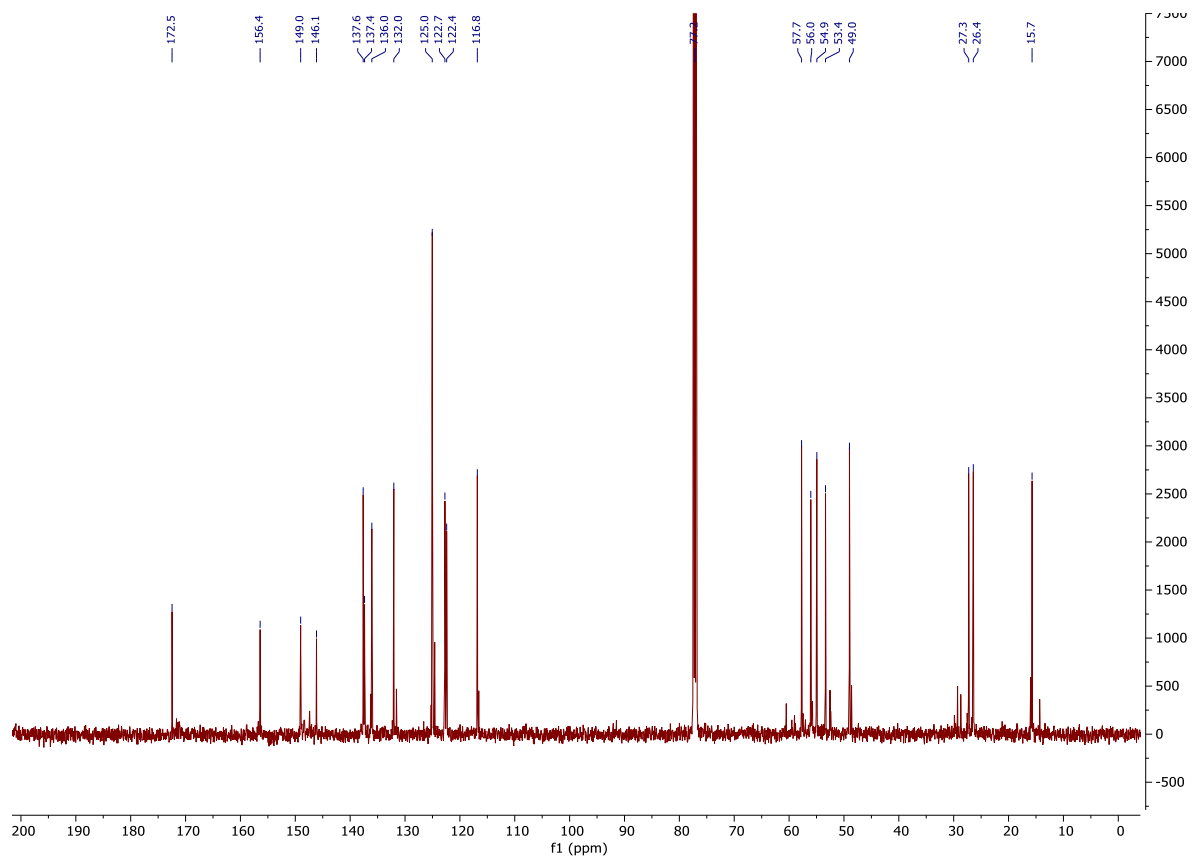

Compound **6a**: (1*S*,5*S*,6*R*)-10-((*S*)-3,5-dichloro-*N*-methylphenylsulfonimidoyl)-3-(pyridin-2-ylmethyl)-5-vinyl-3,10-diazabicyclo[4.3.1]decan-2-one

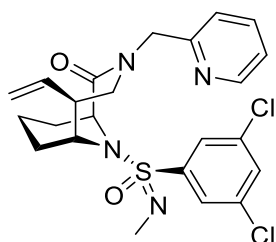

Sulfonimidamide **5a** (5.0 mg, 10.4  $\mu$ mol, 1.0 eq.) was dissolved in THF (1.0 mL) under argon atmosphere and cooled to 0 °C. NaH (60 % in mineral oil, 3.8 mg, 95.0  $\mu$ mol, 9.1 eq.) was added and it was stirred for 30 min at 0 °C. MeI (7.0  $\mu$ L, 112  $\mu$ mol, 10.8 eq.) was added and the reaction mixture was stirred for 24 h at room temperature. The reaction was quenched with MeOH and water and extracted with DCM. The organic phase was dried over MgSO<sub>4</sub>, filtered and concentrated *in vacuo*. The crude product was purified by column chromatography (Cy/EA 1:2) to afford **6a**.

Yield: 4.2 mg, 82 %

Purity: 98 % (HPLC, UV-absorption 220 nm)

Appearance: colourless solid

TLC: R<sub>f</sub> = 0.43 (Cy/EA 1:2)

HR-MS (ESI): *m/z* calculated for sum formula C<sub>23</sub>H<sub>26</sub>Cl<sub>2</sub>N<sub>4</sub>O<sub>2</sub>S: [M+H]<sup>+</sup> = 493.12263, found: [M+H]<sup>+</sup> = 493.12305, error: 0.42 mDa or 0.86 ppm

<sup>1</sup>H-NMR (500 MHz, CDCl<sub>3</sub>):  $\delta$  = 1.26–1.33 (m, 1H), 1.35–1.46 (m, 1H), 1.46–1.51 (m, 1H), 1.51–1.57 (m, 1H), 1.57–1.65 (m, 1H), 2.23 (d, 1H, *J* = 13.5 Hz), 2.64–2.73 (m, 1H), 2.80 (s, 3H), 3.09 (d, 1H, *J* = 14.1 Hz), 3.85 (dd, 1H, *J* = 13.8/11.0 Hz), 4.18–4.28 (m, 1H), 4.80 (d, 1H, *J* = 6.0 Hz), 4.83–4.90 (m, 2H), 5.01 (d, 1H, *J* = 17.0 Hz), 5.06 (d, 1H, *J* = 10.1 Hz), 5.64–5.75 (m, 1H), 7.29–7.37 (m, 1H), 7.37–7.47 (m, 1H), 7.50 (t, 1H, *J* = 1.9 Hz), 7.74 (d, 2H, *J* = 1.9 Hz), 7.78–7.88 (m, 1H), 8.54 (d, 1H, *J* = 4.8 Hz) ppm.

<sup>13</sup>C-NMR (125 MHz, CDCl<sub>3</sub>):  $\delta$  = 15.8, 26.6, 27.5, 29.1, 49.0, 52.0, 54.7, 55.2, 57.2, 116.8, 123.2, 125.7, 132.1, 136.2, 137.9, 144.3, 156.5, 171.6 ppm.

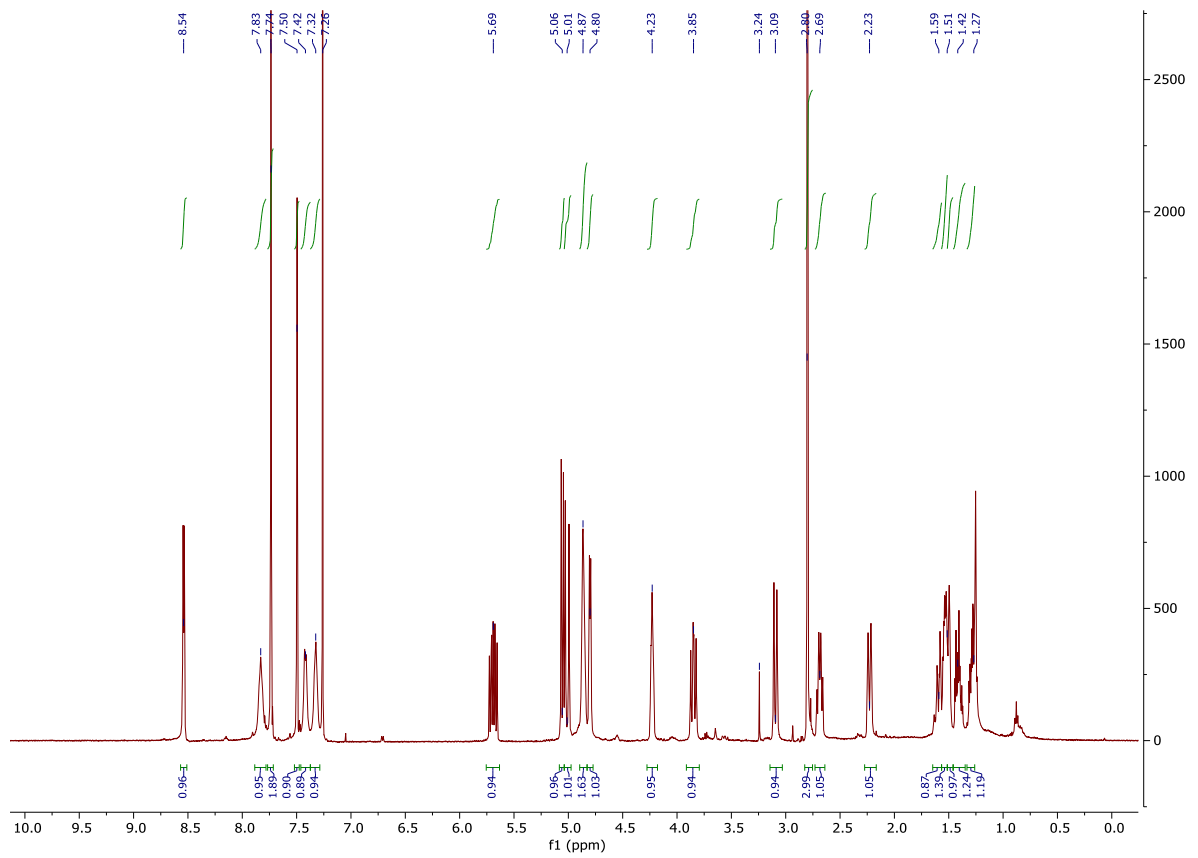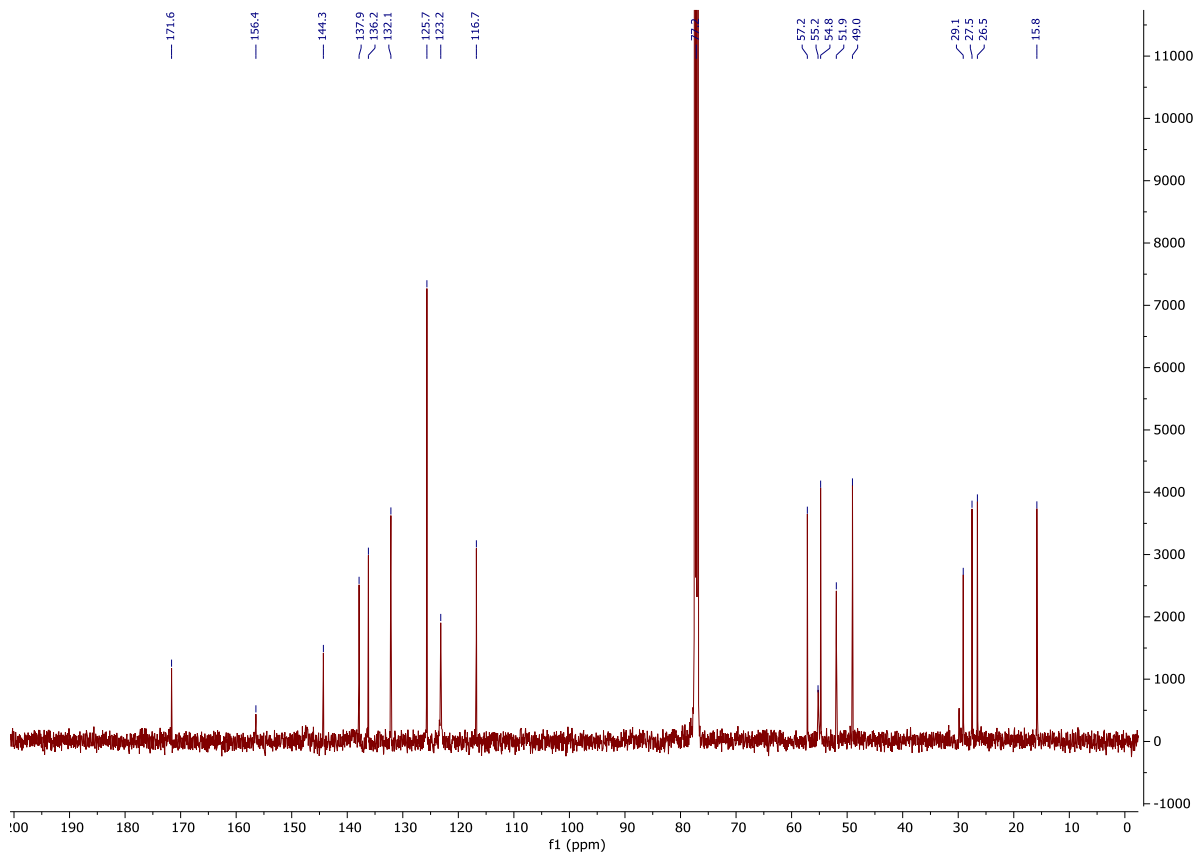

Compound **6b**: (1*S*,5*S*,6*R*)-10-((*R*)-3,5-dichloro-*N*-methylphenylsulfonimidoyl)-3-(pyridin-2-ylmethyl)-5-vinyl-3,10-diazabicyclo[4.3.1]decan-2-one

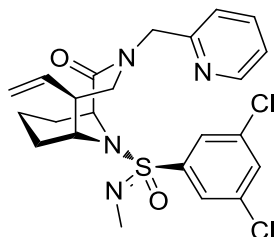

Sulfonimidamide **5b** (8.3 mg, 17.3  $\mu$ mol, 1.0 eq.) was dissolved in THF (1.0 mL) under argon atmosphere and cooled to 0  $^{\circ}$ C. NaH (60 % in mineral oil, 4.2 mg, 105  $\mu$ mol, 8.7 eq.) was added and it was stirred for 30 min at 0  $^{\circ}$ C. MeI (11  $\mu$ L, 177  $\mu$ mol, 10.2 eq.) was added and the reaction mixture was stirred for 24 h at room temperature. The reaction was quenched with MeOH and water and extracted with DCM. The organic phase was dried over  $MgSO_4$ , filtered and concentrated *in vacuo*. The crude product was purified by column chromatography (Cy/EA 1:2) to afford **6b**.

Yield: 5.4 mg, 64 %

Purity: 96 % (HPLC, UV-absorption 220 nm)

Appearance: colourless solid

TLC:  $R_f$  = 0.40 (Cy/EA 1:2)

HR-MS (ESI):  $m/z$  calculated for sum formula  $C_{23}H_{26}Cl_2N_4O_2S$ :  $[M+H]^+ = 493.12263$ , found:  $[M+H]^+ = 493.12303$ , error: 0.40 mDa or 0.82 ppm

$^1H$ -NMR (500 MHz,  $CDCl_3$ ):  $\delta$  = 1.06–1.13 (m, 1H), 1.13–1.21 (m, 1H), 1.37–1.48 (m, 2H), 1.48–1.62 (m, 1H), 2.21 (d, 1H,  $J$  = 13.7 Hz), 2.64–2.72 (m, 1H), 2.77 (s, 3H), 3.19 (dd, 1H,  $J$  = 14.0/1.6 Hz), 3.98–4.05 (m, 1H), 4.14 (dd, 1H,  $J$  = 14.0/10.8 Hz), 4.84–4.90 (m, 3H), 4.99 (d, 1H,  $J$  = 17.0 Hz), 5.04 (d, 1H,  $J$  = 10.2 Hz), 5.69–5.79 (m, 1H), 7.26–7.30 (m, 1H), 7.41 (d, 1H,  $J$  = 7.7 Hz), 7.50 (t, 1H,  $J$  = 1.9 Hz), 7.71–7.77 (m, 1H), 7.79 (d, 2H,  $J$  = 1.9 Hz), 5.84 (d, 1H,  $J$  = 4.8 Hz) ppm.

$^{13}C$ -NMR (125 MHz,  $CDCl_3$ ):  $\delta$  = 15.7, 25.9, 27.0, 28.0, 49.4, 52.3, 54.3, 55.8, 57.6, 116.8, 123.0, 123.2, 125.2, 132.1, 136.1, 137.7, 138.0, 144.9, 148.2, 156.7, 171.6 ppm.

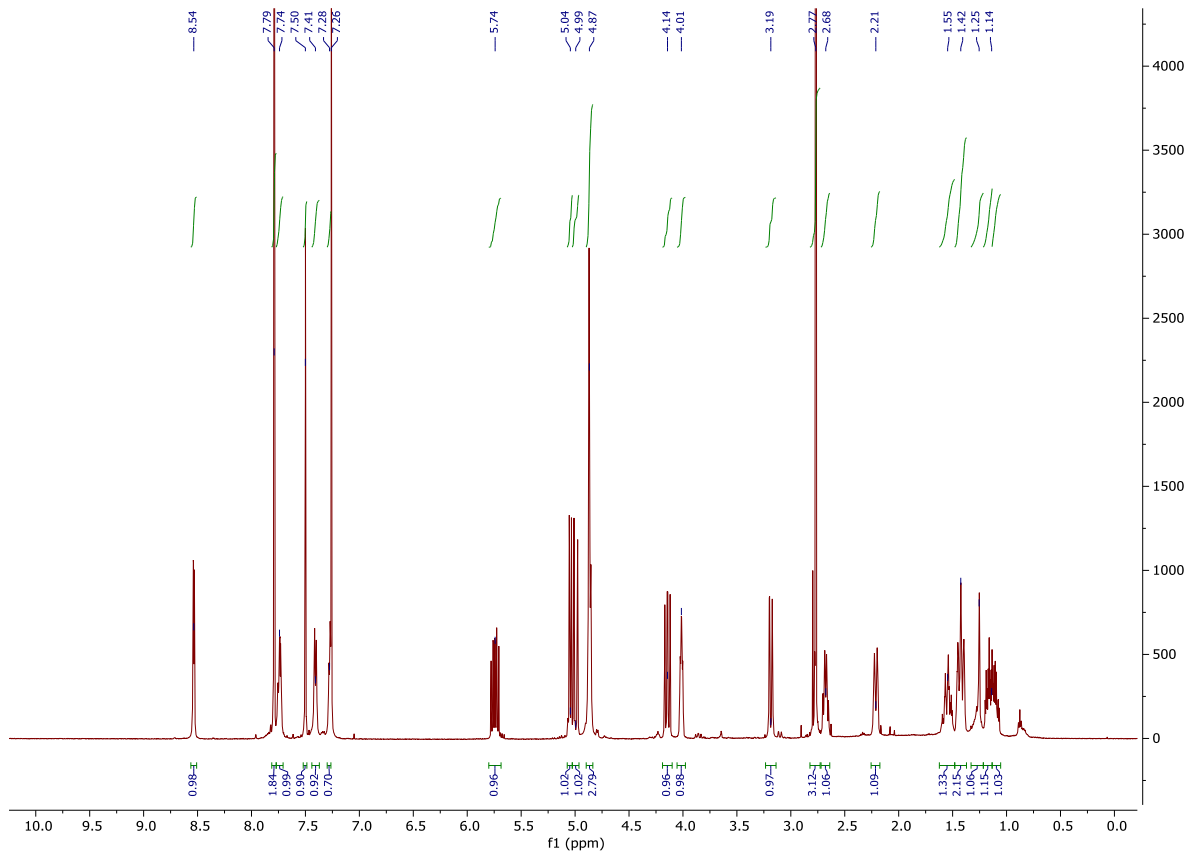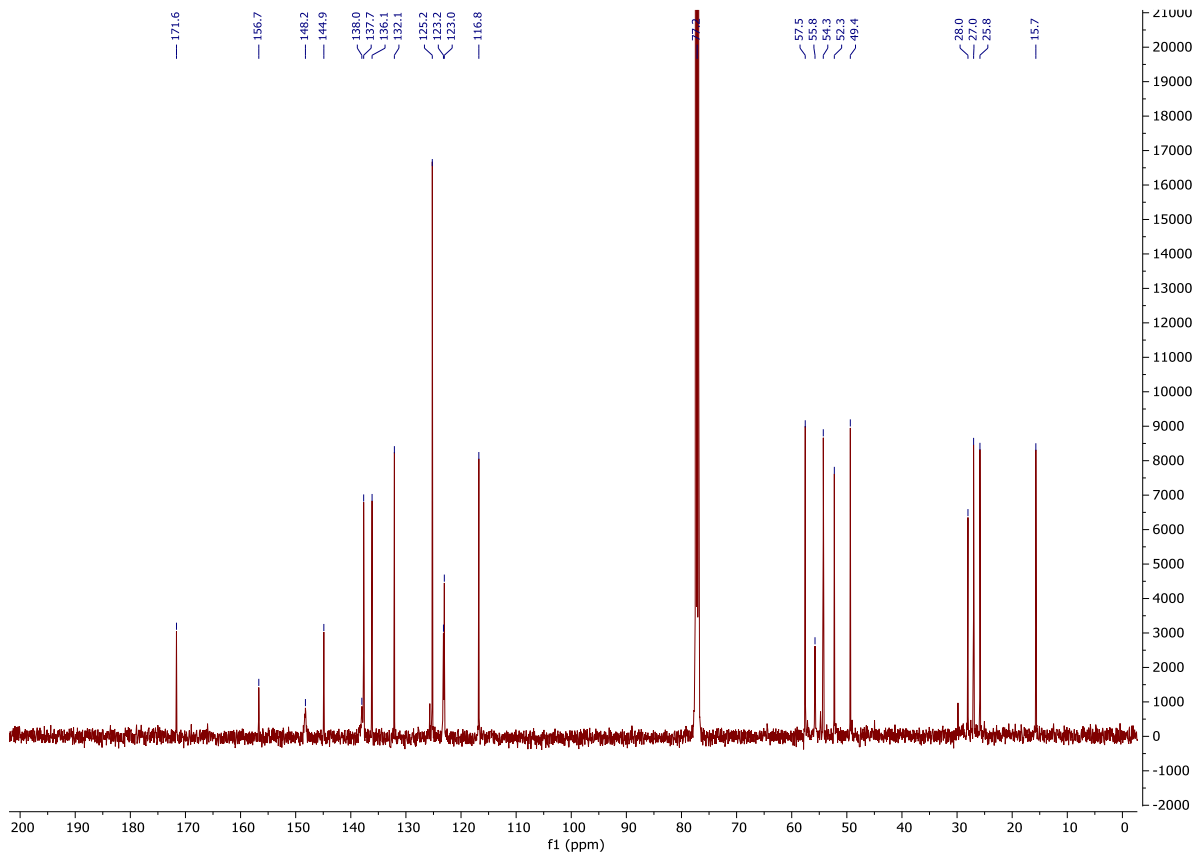



Compound **7a**: (1*S*,5*S*,6*R*)-10-((*S*)-*N*-allyl-3,5-dichlorophenylsulfonimidoyl)-3-(pyridin-2-ylmethyl)-5-vinyl-3,10-diazabicyclo[4.3.1]decan-2-one

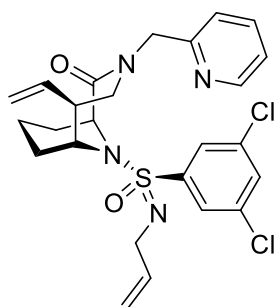

Sulfonimidamide **5a** (5.8 mg, 12.1  $\mu$ mol, 1.0 eq.) was dissolved in THF (1.0 mL) under argon atmosphere and cooled to 0 °C. NaH (60 % in mineral oil, 3.7 mg, 55.3  $\mu$ mol, 4.6 eq.) was added and it was stirred for 30 min at 0 °C. Allylbromide (20  $\mu$ L, 231  $\mu$ mol, 19.1 eq.) was added and the reaction mixture was allowed to reach room temperature. After 17 h the solution was again cooled to 0 °C, NaH (60 % in mineral oil, 7.2 mg, 108  $\mu$ mol, 8.9 eq.) and allylbromide (20  $\mu$ L, 231  $\mu$ mol, 19.1 eq.) were added and the reaction mixture was allowed to reach room temperature. After another 25 h water was added and the mixture was extracted with DCM. The organic phase was dried over MgSO<sub>4</sub>, filtered and concentrated *in vacuo*. The crude product was purified by column chromatography (Cy/EA 2:1–1:1) to afford **7a**.

Yield: 6.3 mg, 100 %

Purity: 95 % (HPLC, UV-absorption 220 nm)

Appearance: colourless solid

TLC: R<sub>f</sub> = 0.38 (Cy/EA 1:1)

HR-MS (ESI): m/z calculated for sum formula C<sub>25</sub>H<sub>28</sub>Cl<sub>2</sub>N<sub>4</sub>O<sub>2</sub>S: [M+H]<sup>+</sup> = 519.13828, found: [M+H]<sup>+</sup> = 519.13826, error: 0.01 mDa or 0.03 ppm

<sup>1</sup>H-NMR (500 MHz, CDCl<sub>3</sub>):  $\delta$  = 1.19–1.30 (m, 1H), 1.43–1.52 (m, 1H), 1.52–1.66 (m, 3H), 2.18 (d, 1H, *J* = 13.0 Hz), 2.71–2.81 (m, 1H), 3.13 (d, 1H, *J* = 13.9 Hz), 3.59–3.71 (m, 2H), 4.08–4.16 (m, 1H), 4.40–4.47 (m, 1H), 4.62–4.73 (m, 2H), 5.06–5.10 (m, 1H), 5.11 (s, 1H), 5.14 (d, 1H, *J* = 7.7 Hz), 5.21–5.28 (m, 1H), 5.57 (d, 1H, *J* = 16.5 Hz), 5.69–6.79 (m, 1H), 5.85–5.94 (m, 1H), 7.53 (t, 1H, *J* = 1.8 Hz), 7.70 (d, 2H, *J* = 1.8 Hz), 7.71–7.75 (m, 1H), 7.84 (d, 1H, *J* = 8.0 Hz), 8.26–8.33 (m, 1H), 8.80 (d, 1H, *J* = 5.2 Hz) ppm.

<sup>13</sup>C-NMR (125 MHz, CDCl<sub>3</sub>):  $\delta$  = 14.3, 15.7, 26.7, 27.5, 45.6, 49.2, 53.0, 53.3, 55.0, 56.5, 115.0, 117.4, 125.0, 125.4, 125.9, 132.5, 136.4, 136.6, 136.9, 142.8, 144.0, 144.7, 154.1, 172.8 ppm.

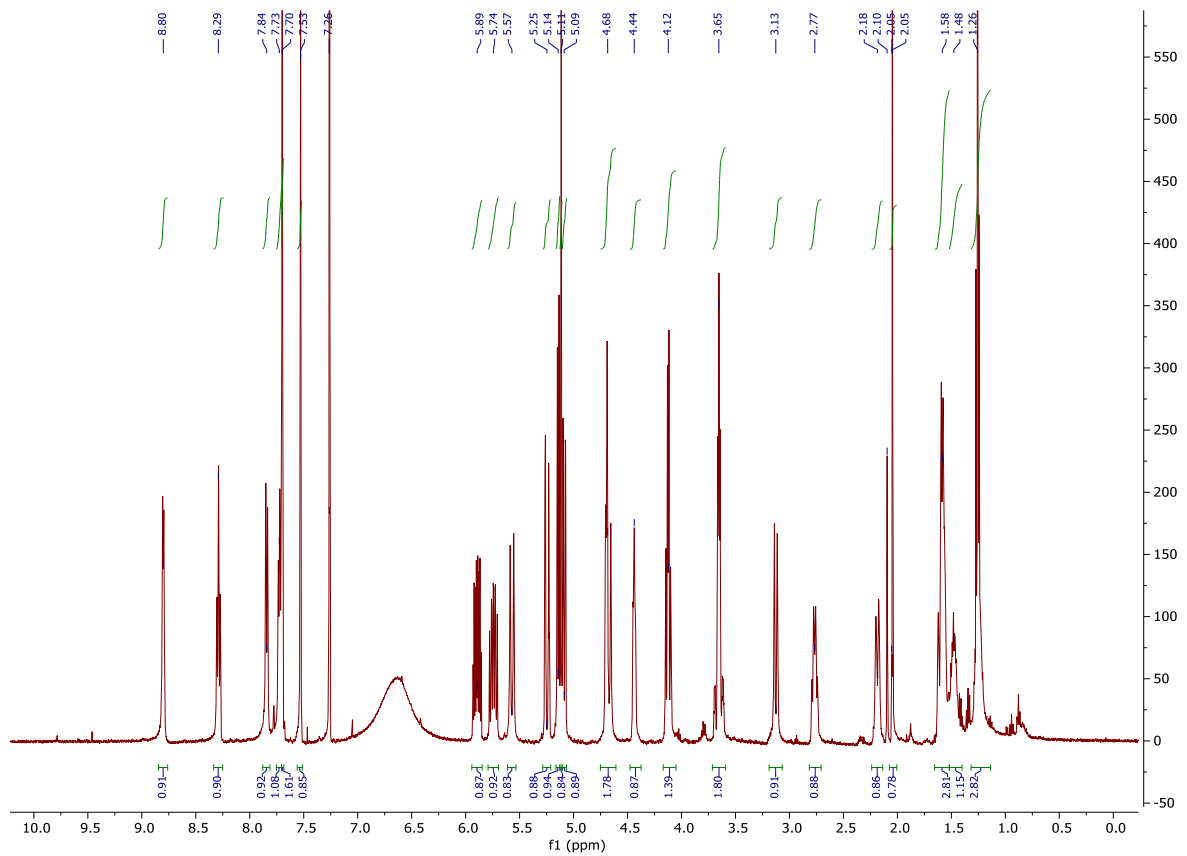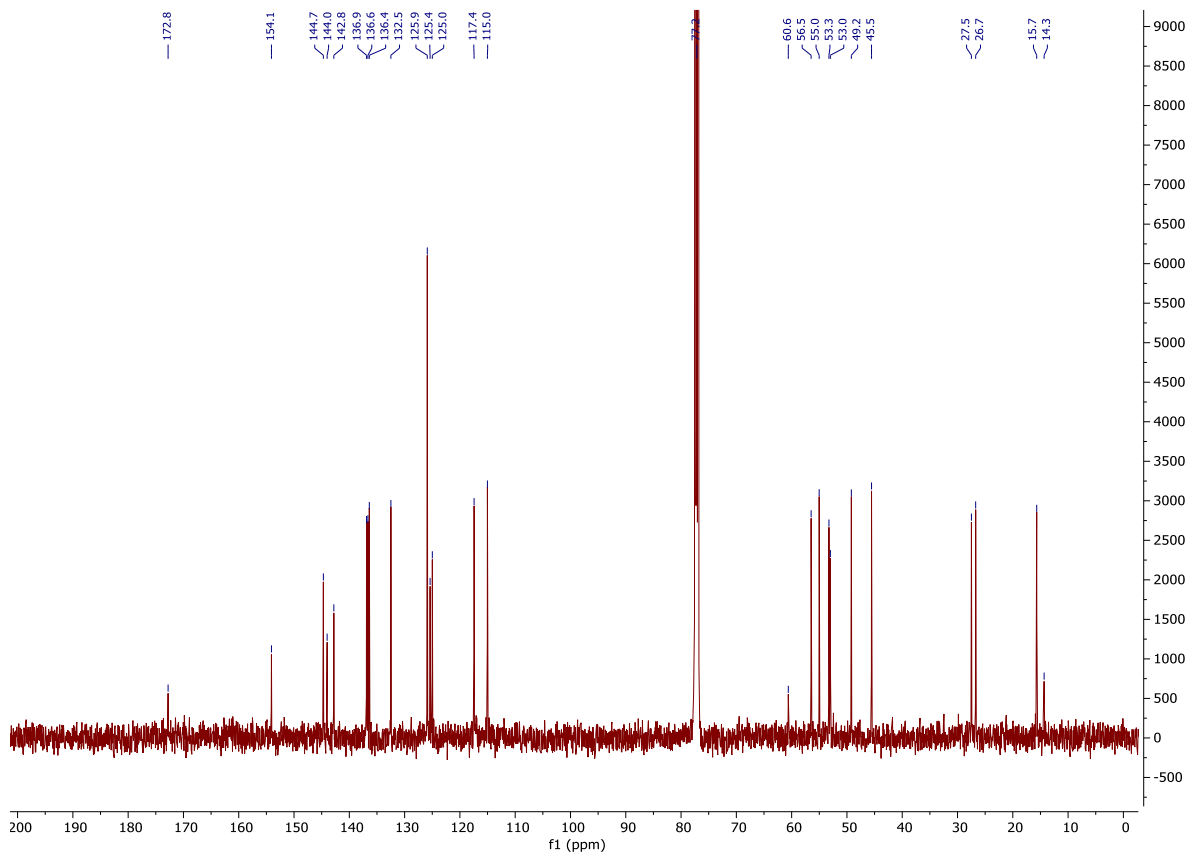

Compound **7b**: (1*S*,5*S*,6*R*)-10-((*R*)-*N*-allyl-3,5-dichlorophenylsulfonimidoyl)-3-(pyridin-2-ylmethyl)-5-vinyl-3,10-diazabicyclo[4.3.1]decan-2-one

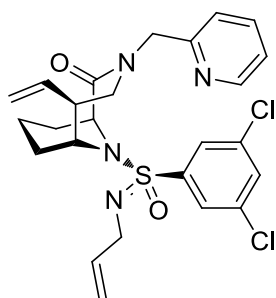

Sulfonimidamide **5b** (5.3 mg, 11.1  $\mu\text{mol}$ , 1.0 eq.) was dissolved in THF (1.0 mL) under argon atmosphere and cooled to 0 °C. NaH (60 % in mineral oil, 3.9 mg, 58.3  $\mu\text{mol}$ , 5.3 eq.) was added and it was stirred for 30 min at 0 °C. Allylbromide (20  $\mu\text{L}$ , 231  $\mu\text{mol}$ , 20.8 eq.) was added and the reaction mixture was allowed to reach room temperature. After 17 h the solution was again cooled to 0 °C, NaH (60 % in mineral oil, 7.5 mg, 112  $\mu\text{mol}$ , 10.1 eq.) and allylbromide (20  $\mu\text{L}$ , 231  $\mu\text{mol}$ , 20.8 eq.) were added and the reaction mixture was allowed to reach room temperature. After another 25 h water was added and the mixture was extracted with DCM. The organic phase was dried over  $\text{MgSO}_4$ , filtered and concentrated *in vacuo*. The crude product was purified by column chromatography (Cy/EA 1:1–1:2) to afford **7b**.

Yield: 4.6 mg, 81 %

Purity: 96 % (HPLC, UV-absorption 220 nm)

Appearance: colourless solid

TLC:  $R_f$  = 0.45 (Cy/EA 1:1)

HR-MS (ESI):  $m/z$  calculated for sum formula  $\text{C}_{25}\text{H}_{28}\text{Cl}_2\text{N}_4\text{O}_2\text{S}$ :  $[\text{M}+\text{H}]^+ = 519.13828$ , found:  $[\text{M}+\text{H}]^+ = 519.13865$ , error: 0.37 mDa or 0.71 ppm

$^1\text{H-NMR}$  (500 MHz,  $\text{CDCl}_3$ ):  $\delta$  = 1.08–1.21 (m, 2H), 1.38–1.50 (m, 2H), 1.50–1.62 (m, 1H), 2.22 (d, 1H,  $J$  = 13.1 Hz), 2.65–2.74 (m, 1H), 3.18 (dd, 1H,  $J$  = 13.9/1.5 Hz), 3.58–3.66 (m, 1H), 3.76–3.83 (m, 1H), 4.00–4.07 (m, 1H), 4.14 (dd, 1H,  $J$  = 13.9/10.7 Hz), 4.79 (d, 1H,  $J$  = 15.3 Hz), 4.92 (d, 1H,  $J$  = 6.1 Hz), 5.02 (d, 1H,  $J$  = 17.0 Hz), 5.06 (d, 1H,  $J$  = 10.2 Hz), 5.07–5.11 (m, 1H), 5.23–5.29 (m, 1H), 4.70–4.80 (m, 1H), 4.86–4.95 (m, 1H), 7.29–7.37 (m, 1H), 7.44–7.50 (m, 1H), 7.51 (t, 1H,  $J$  = 1.9 Hz), 7.75–7.85 (m, 3H), 8.55 (d, 1H,  $J$  = 5.1 Hz) ppm.

$^{13}\text{C-NMR}$  (125 MHz,  $\text{CDCl}_3$ ):  $\delta$  = 15.7, 25.9, 27.1, 44.7, 49.4, 52.5, 54.2, 55.4, 57.8, 115.2, 116.9, 123.3, 123.5, 125.3, 132.2, 136.2, 136.8, 137.5, 144.9, 156.4, 171.7 ppm.

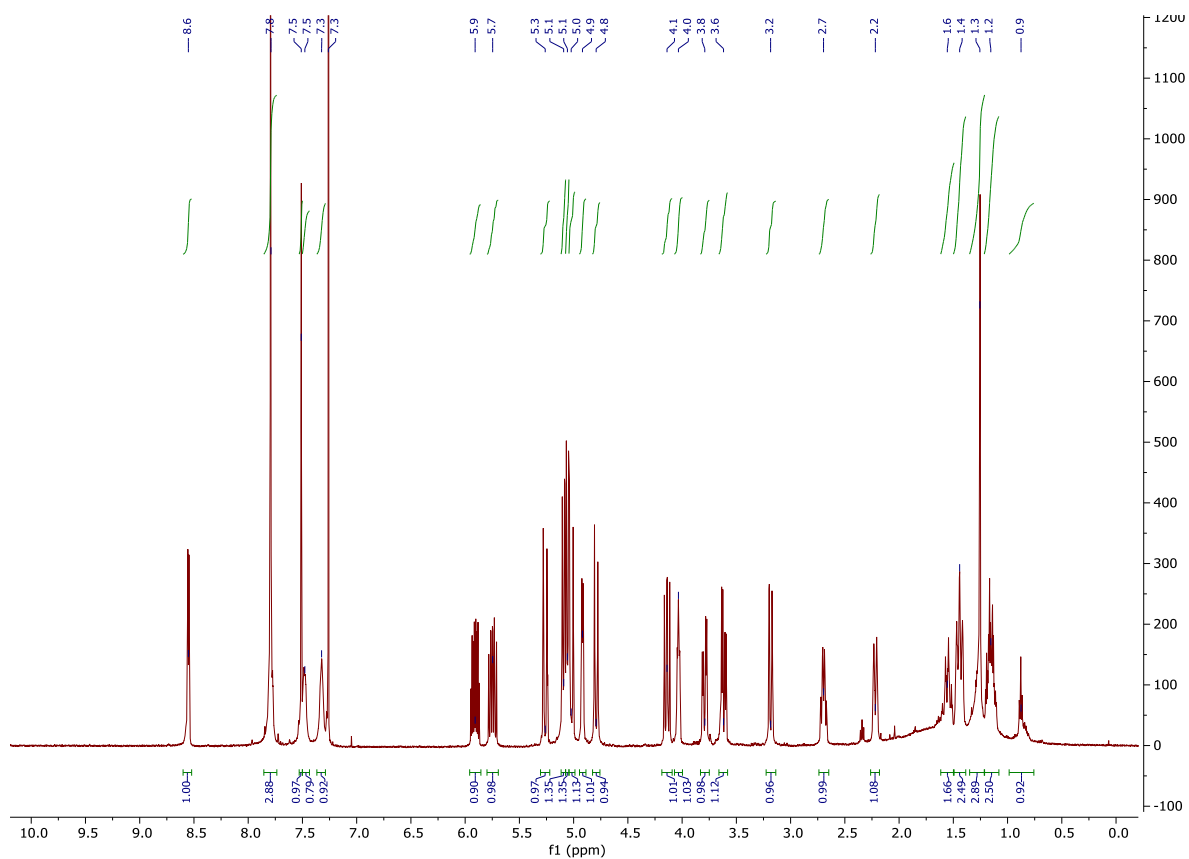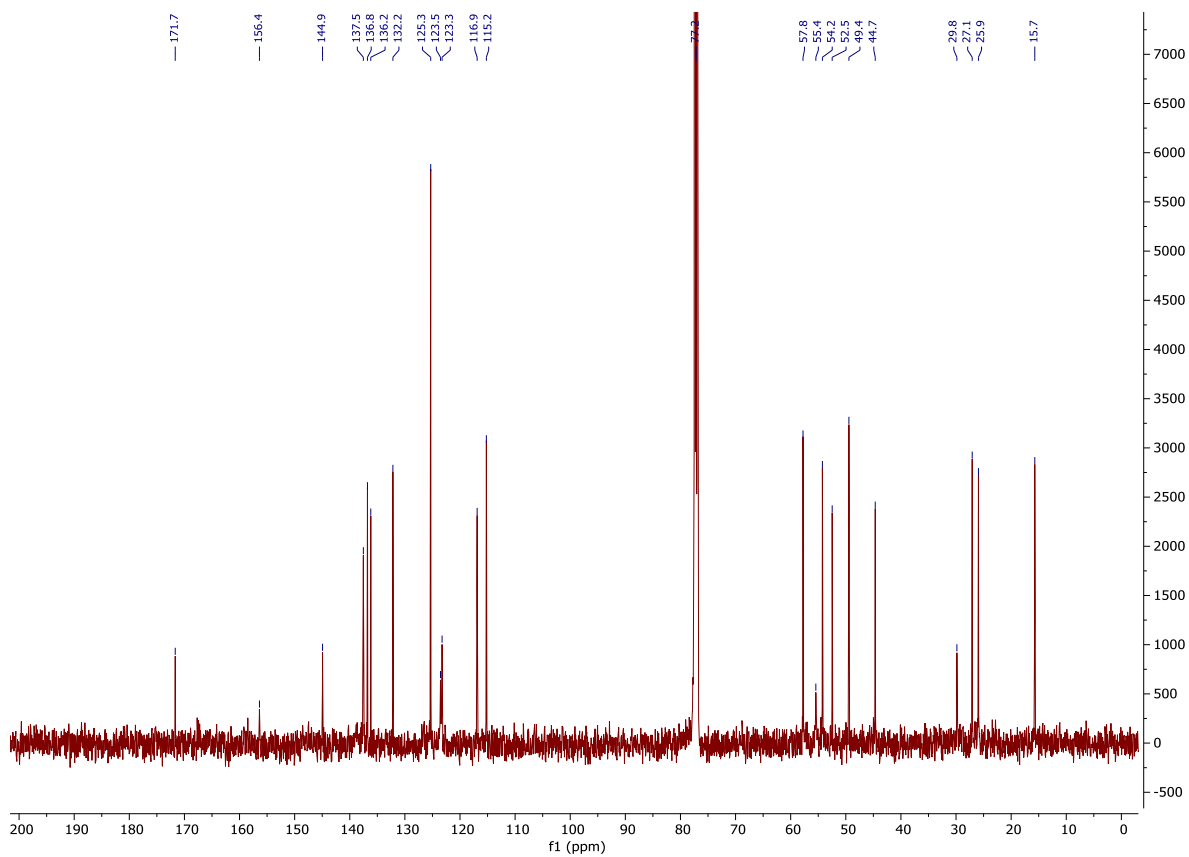

Compound **8a**: (1*S*,5*S*,6*R*)-10-((*S*)-3,5-dichloro-*N*-(cyclohex-2-en-1-yl)phenylsulfonimidoyl)-3-(pyridin-2-ylmethyl)-5-vinyl-3,10-diazabicyclo[4.3.1]decan-2-one

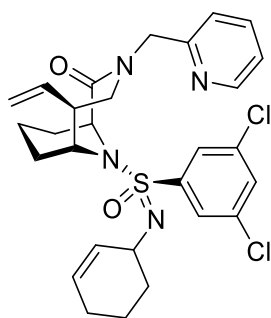

Sulfonimidamide **5a** (15.5 mg, 32.3  $\mu$ mol, 1.0 eq.) was dissolved in THF (1.0 mL) under argon atmosphere and cooled to 0 °C. NaH (60 % in mineral oil, 11 mg, 165  $\mu$ mol, 5.1 eq.) was added and it was stirred for 30 min at 0 °C. 3-Bromocyclohexene (73  $\mu$ L, 626  $\mu$ mol, 19.4 eq.) was added and the reaction mixture was allowed to reach room temperature. After 45 h the solution was again cooled to 0 °C, NaH (60 % in mineral oil, 10 mg, 150  $\mu$ mol, 4.6 eq.) and 3-bromocyclohexene (73  $\mu$ L, 626  $\mu$ mol, 19.4 eq.) were added and the reaction mixture was allowed to reach room temperature. After another 3 d water was added and the mixture was extracted with DCM. The organic phase was dried over MgSO<sub>4</sub>, filtered and concentrated *in vacuo*. The crude product was purified by column chromatography (Cy/EA 2:1–1:1) to afford **8a** as a mixture of (*R*)- and (*S*)-cyclohex-2-en-1-yl epimers. Analytical HPLC showed no separation of these diastereomers.

Yield: 11.9 mg, 66 %

Purity: 97 % (HPLC, UV-absorption 220 nm)

Appearance: colourless solid

TLC: R<sub>f</sub> = 0.38 (Cy/EA 1:1)

HR-MS (ESI): *m/z* calculated for sum formula C<sub>28</sub>H<sub>32</sub>Cl<sub>2</sub>N<sub>4</sub>O<sub>2</sub>S: [M+H]<sup>+</sup> = 559.16958, found: [M+H]<sup>+</sup> = 559.16916, error: 0.42 mDa or 0.75 ppm

<sup>1</sup>H-NMR (500 MHz, CDCl<sub>3</sub>):  $\delta$  = 1.26–1.35 (m, 1H), 1.40–1.58 (m, 4H), 1.58–1.73 (m, 2H), 1.73–1.83 (m, 1H), 1.83–1.89 (m, 1H), 1.89–1.97 (m, 1H), 1.97–2.06 (m, 1H), 2.25 (d, 1H, *J* = 13.5 Hz), 2.59–2.73 (m, 1H), 3.02 (dd, 1H, *J* = 14.0/1.3 Hz), 3.75–3.91 (m, 2H), 4.29–4.39 (m, 1H), 4.67–4.80 (m, 2H), 4.79–4.88 (m, 1H), 4.98 (d, 1H, *J* = 16.9 Hz), 5.02 (d, 1H, *J* = 10.1 Hz), 5.53–5.65 (m, 1H), 5.65–5.71 (m, 1H), 5.70–5.78 (m, 1H), 7.22–7.29 (m, 1H), 7.35 (d, 1H, *J* = 7.9 Hz), 7.45–7.49 (m, 1H), 7.69–7.73 (m, 2H), 7.73–7.79 (m, 1H), 8.52 (m, 1H, *J* = 4.9 Hz) ppm.

<sup>13</sup>C-NMR (125 MHz, CDCl<sub>3</sub>):  $\delta$  = 15.9, 20.2, 20.4, 24.9, 24.9, 26.8, 26.9, 27.8, 27.9, 29.8, 33.0, 33.0, 49.1, 49.1, 49.4, 49.9, 52.0, 54.9, 55.7, 56.6, 56.7, 116.6, 122.7, 122.8, 125.8, 125.8, 128.7, 128.9, 131.0, 131.4, 132.0, 136.0, 136.0, 137.8, 138.1, 145.3, 145.4, 148.2, 156.9, 171.7 ppm.

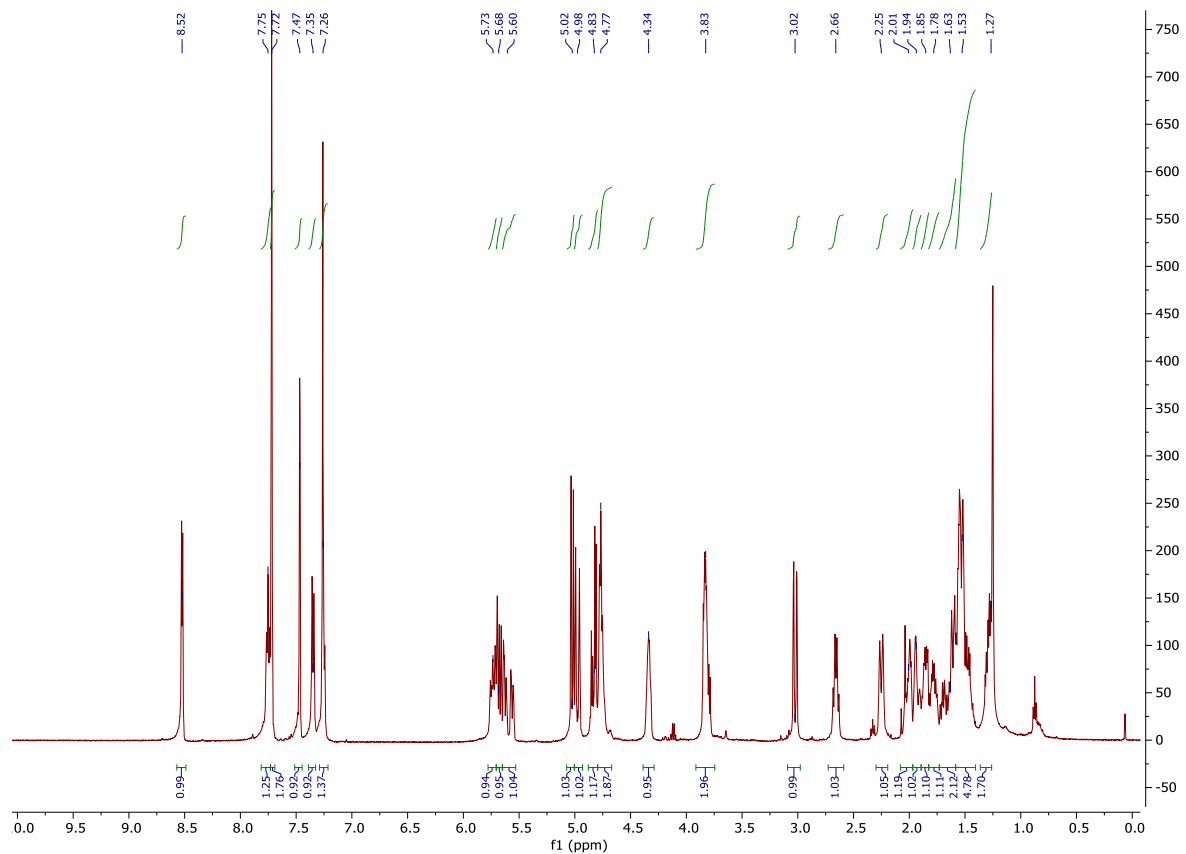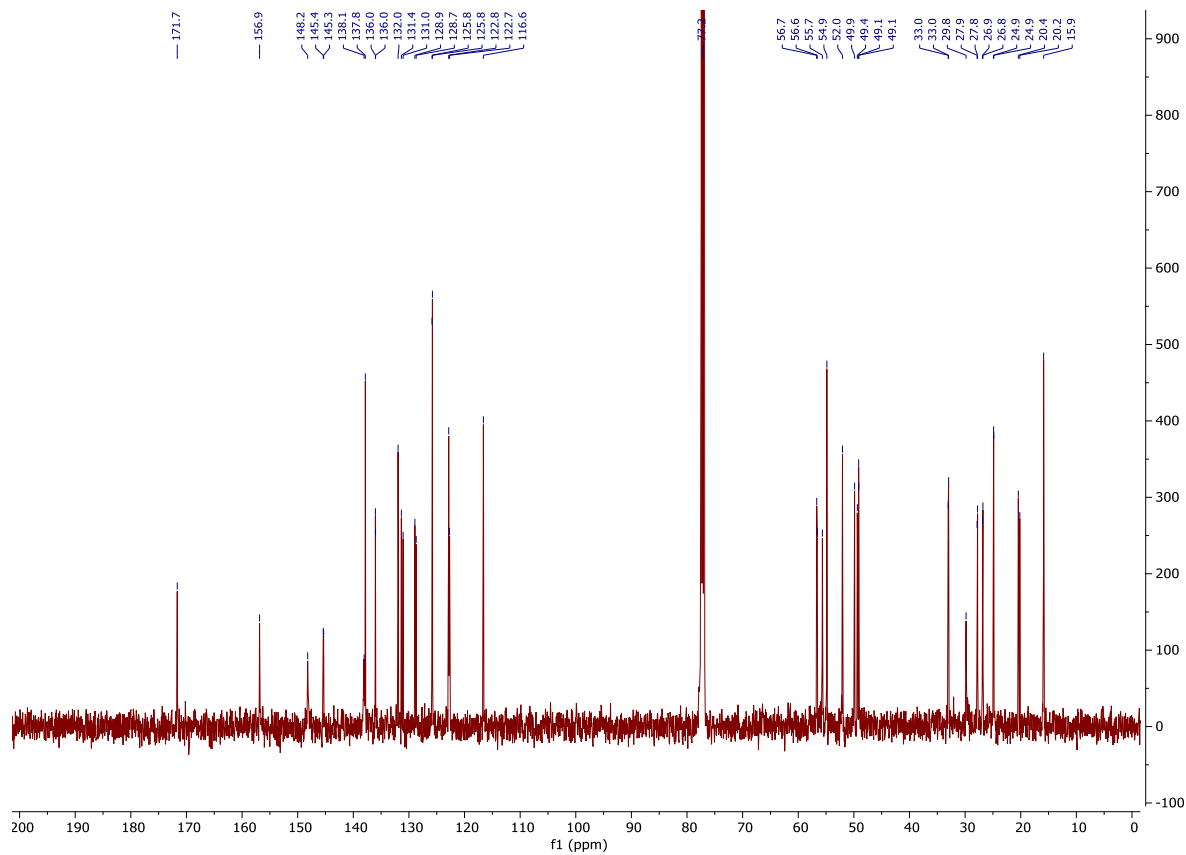

Compound **8b**: (1*S*,5*S*,6*R*)-10-((*R*)-3,5-dichloro-*N*-(cyclohex-2-en-1-yl)phenylsulfonimidoyl)-3-(pyridin-2-ylmethyl)-5-vinyl-3,10-diazabicyclo[4.3.1]decan-2-one

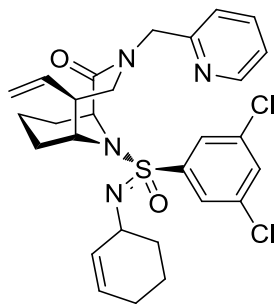

Sulfonimidamide **5b** (15.9 mg, 33.2  $\mu$ mol, 1.0 eq.) was dissolved in THF (1.0 mL) under argon atmosphere and cooled to 0 °C. NaH (60 % in mineral oil, 9.0 mg, 135  $\mu$ mol, 4.1 eq.) was added and it was stirred for 30 min at 0 °C. 3-Bromocyclohexene (73  $\mu$ L, 626  $\mu$ mol, 18.9 eq.) was added and the reaction mixture was allowed to reach room temperature. After 42 h water was added and the mixture was extracted with DCM. The organic phase was dried over MgSO<sub>4</sub>, filtered and concentrated *in vacuo*. The crude product was purified by column chromatography (Cy/EA 2:1–1:1) to afford **8b** as a mixture of (*R*)- and (*S*)-cyclohex-2-en-1-yl epimers. Analytical HPLC showed a ratio of 56/44 for these diastereomers.

Yield: 15.8 mg, 85 %

Purity: >99 % (HPLC, UV-absorption 220 nm)

Appearance: colourless oil

TLC: R<sub>f</sub> = 0.41 (Cy/EA 1:1)

HR-MS (ESI): m/z calculated for sum formula C<sub>28</sub>H<sub>32</sub>Cl<sub>2</sub>N<sub>4</sub>O<sub>2</sub>S: [M+H]<sup>+</sup> = 559.16958, found: [M+H]<sup>+</sup> = 559.16995, error: 0.37 mDa or 0.67 ppm

<sup>1</sup>H-NMR (500 MHz, CDCl<sub>3</sub>):  $\delta$  = 1.05–1.20 (m, 2H), 1.35–1.47 (m, 3H), 1.53–1.59 (m, 1H), 1.62–1.72 (m, 1H), 1.73–1.83 (m, 1H), 1.86–1.92 (m, 1H), 1.92–1.98 (m, 1H), 1.98–2.08 (m, 1H), 2.20 (d, 1H, *J* = 13.5 Hz), 2.65–2.74 (m, 1H), 3.14 (ddd, 1H, *J* = 13.9/7.2/1.6 Hz), 3.87–4.02 (m, 1H), 4.02–4.06 (m, 1H), 4.06–4.19 (m, 1H), 4.62 and 5.07 (d, 1H, *J* = 15.1 Hz, each 50 %), 4.79 and 4.87 (d, 1H, *J* = 15.1 Hz, each 50 %), 4.90–5.05 (m, 3H), 5.58–5.80 (m, 3H), 7.19–7.25 (m, 1H), 7.37 (dd, 1H, *J* = 12.2/7.9 Hz), 7.47–7.50 (m, 1H), 7.63–7.70 (m, 1H), 7.79 (t, 1H, *J* = 1.6 Hz), 8.49–8.56 (m, 1H) ppm.

<sup>13</sup>C-NMR (125 MHz, CDCl<sub>3</sub>):  $\delta$  = 15.7, 20.3, 24.9, 24.9, 25.8, 26.9, 32.4, 33.4, 49.0, 49.2, 49.5, 49.6, 52.1, 52.3, 54.3, 55.9, 56.0, 57.9, 116.7, 116.7, 122.7, 122.7, 122.8, 123.1, 125.3, 125.3, 128.5, 129.2, 130.9, 131.5, 131.9, 131.9, 136.0, 136.0, 137.4, 137.6, 137.7, 137.8, 145.4, 145.5, 148.6, 148.9, 157.0, 171.5, 171.6 ppm.

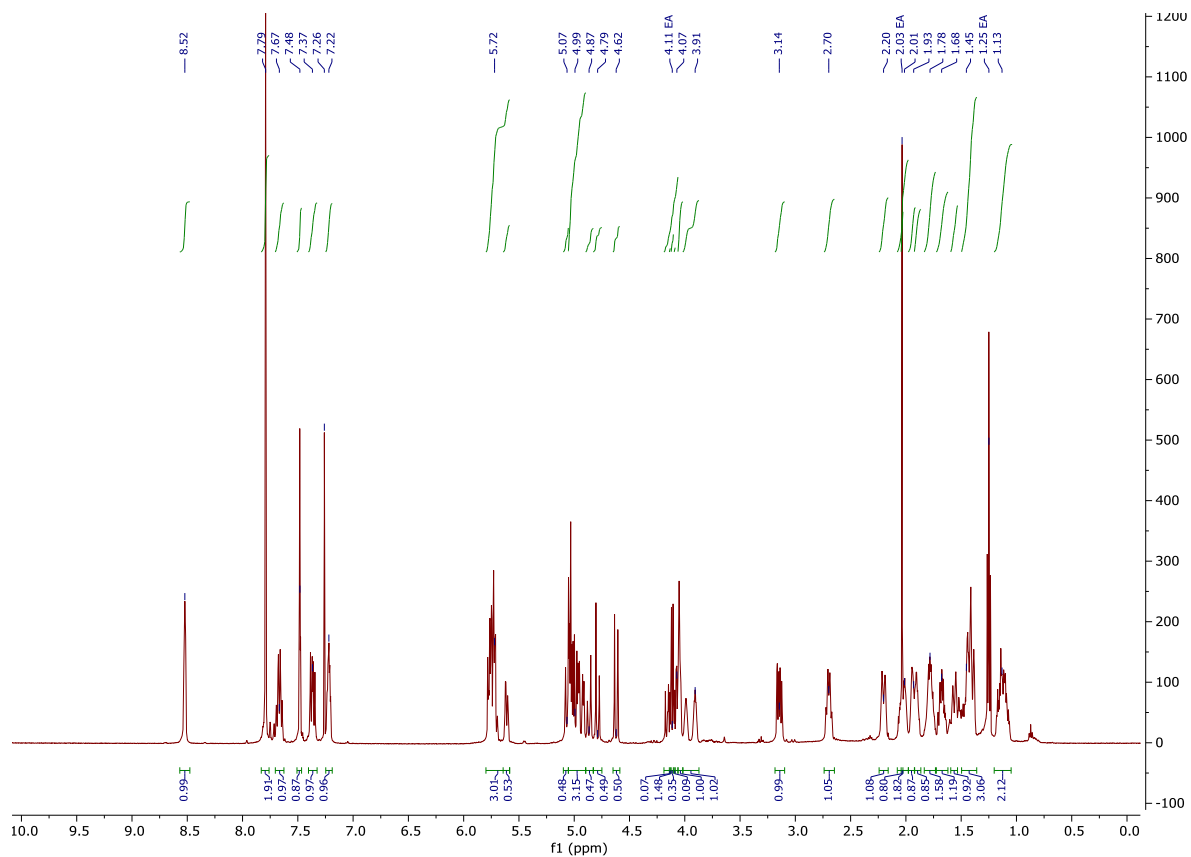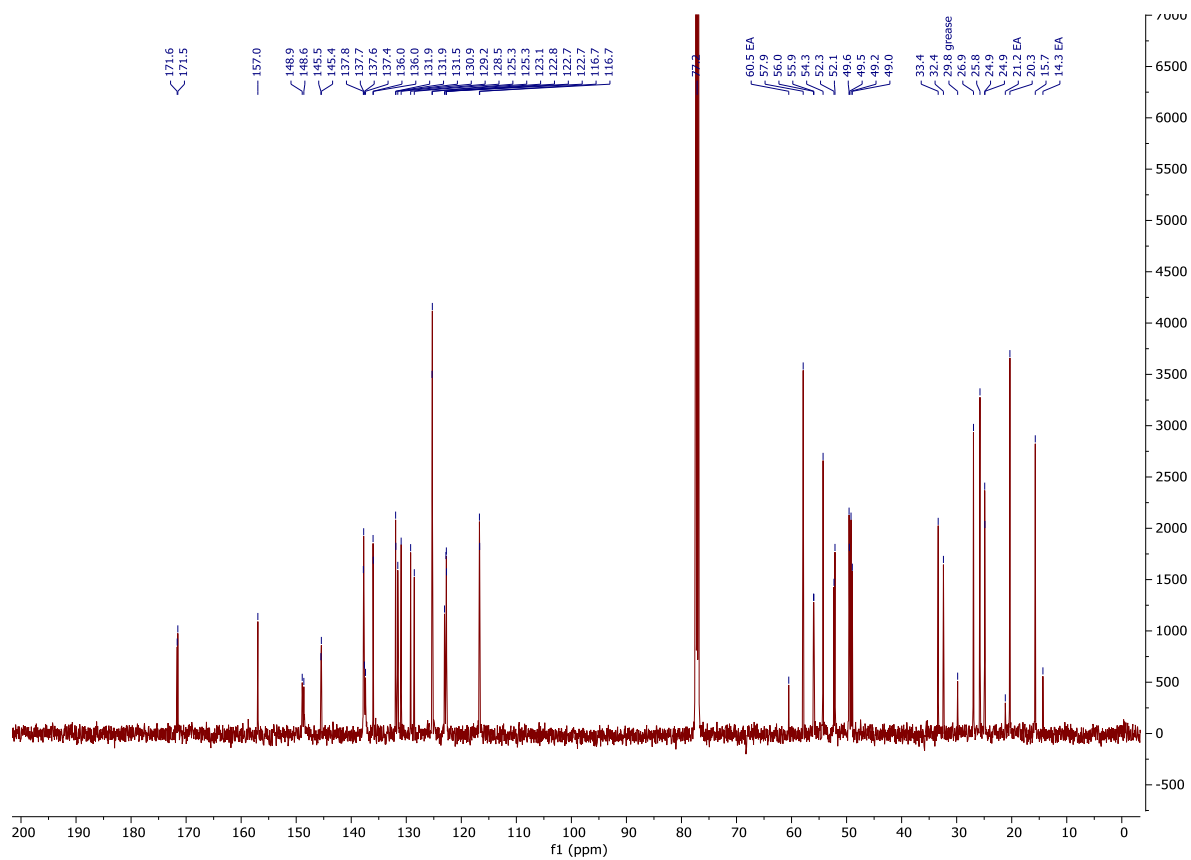



Compound **9a**: (1*S*,5*S*,6*R*)-10-((*S*)-3,5-dichloro-*N*-phenylphenylsulfonimidoyl)-3-(pyridin-2-ylmethyl)-5-vinyl-3,10-diazabicyclo[4.3.1]decan-2-one

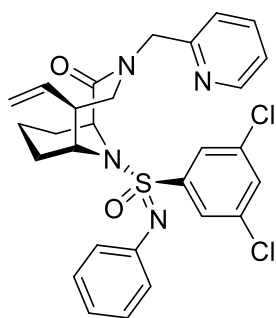

Sulfonimidamide **5a** (8.6 mg, 17.9  $\mu\text{mol}$ , 1.0 eq.), phenylboronic acid (18.3 mg, 150  $\mu\text{mol}$ , 8.4 eq.) and  $\text{Cu}(\text{OAc})_2$  (7.3 mg, 40.2  $\mu\text{mol}$ , 2.2 eq.) were dissolved in MeCN (1 mL) under argon atmosphere, then TEA (5  $\mu\text{L}$ , 36.1  $\mu\text{mol}$ , 2.0 eq.) was added. The reaction mixture was stirred at room temperature for 42 h, then water was added and it was extracted with EA. The organic phase was dried over  $\text{MgSO}_4$ , filtered and concentrated *in vacuo*. The crude product was purified by column chromatography (Cy/EA 2:1–1:1) to afford **9a**.

Yield: 10.0 mg, 100 %

Purity: 96 % (HPLC, UV-absorption 220 nm)

Appearance: colourless solid

TLC:  $R_f = 0.34$  (Cy/EA 1:1)

HR-MS (ESI):  $m/z$  calculated for sum formula  $\text{C}_{28}\text{H}_{28}\text{Cl}_2\text{N}_4\text{O}_2\text{S}$ :  $[\text{M}+\text{H}]^+ = 555.13828$ , found:  $[\text{M}+\text{H}]^+ = 555.13832$ , error: 0.04 mDa or 0.08 ppm

$^1\text{H-NMR}$  (500 MHz,  $\text{CDCl}_3$ ):  $\delta = 1.08\text{--}1.18$  (m, 1H), 1.18–1.31 (m, 1H), 1.39–1.48 (m, 2H), 1.41–1.61 (m, 1H), 2.17 (d, 1H,  $J = 13.6$  Hz), 2.52–2.61 (m, 1H), 2.75 (d, 1H,  $J = 14.1$  Hz), 3.44 (dd, 1H,  $J = 14.0/10.9$  Hz), 4.18–4.24 (m, 1H), 4.76 (d, 1H,  $J = 15.4$  Hz), 4.79–4.99 (m, 4H), 5.30–5.42 (m, 1H), 6.94–7.00 (m, 1H), 7.15–7.23 (m, 4H), 7.28–7.32 (m, 1H), 7.32–7.36 (m, 1H), 7.53 (t, 1H,  $J = 1.9$  Hz), 7.78–7.84 (m, 1H), 7.89 (d, 1H,  $J = 1.9$  Hz), 8.52 (d, 1H,  $J = 4.8$  Hz) ppm.

$^{13}\text{C-NMR}$  (125 MHz,  $\text{CDCl}_3$ ):  $\delta = 15.7, 25.8, 27.0, 48.9, 51.3, 55.3, 55.4, 57.5, 116.8, 122.9, 123.1, 123.3, 124.2, 125.9, 129.4, 132.6, 136.3, 137.6, 138.7, 142.4, 144.4, 147.6, 156.5, 171.5$  ppm.



Compound **9b**: (1*S*,5*S*,6*R*)-10-((*R*)-3,5-dichloro-*N*-phenylphenylsulfonimidoyl)-3-(pyridin-2-ylmethyl)-5-vinyl-3,10-diazabicyclo[4.3.1]decan-2-one

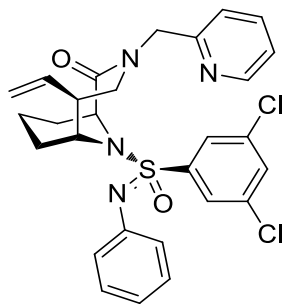

Sulfonimidamide **5b** (7.4 mg, 15.4  $\mu$ mol, 1.0 eq.), phenylboronic acid (14.9 mg, 122  $\mu$ mol, 7.9 eq.) and Cu(OAc)<sub>2</sub> (9.9 mg, 54.5  $\mu$ mol, 3.5 eq.) were dissolved in MeCN (1 mL) under argon atmosphere, then TEA (5  $\mu$ L, 36.1  $\mu$ mol, 2.3 eq.) was added. The reaction mixture was stirred at room temperature for 18 h, then water was added and it was extracted with EA. The organic phase was dried over MgSO<sub>4</sub>, filtered and concentrated *in vacuo*. The crude product was purified by column chromatography (Cy/EA 2:1–1:2) to afford **9b**.

Yield: 7.5 mg, 87 %

Purity: 98 % (HPLC, UV-absorption 220 nm)

Appearance: colourless solid

TLC: R<sub>f</sub> = 0.33 (Cy/EA 1:1)

HR-MS (ESI): *m/z* calculated for sum formula C<sub>28</sub>H<sub>28</sub>Cl<sub>2</sub>N<sub>4</sub>O<sub>2</sub>S: [M+H]<sup>+</sup> = 555.13828, found: [M+H]<sup>+</sup> = 555.13811, error: 0.17 mDa or 0.30 ppm

<sup>1</sup>H-NMR (500 MHz, CDCl<sub>3</sub>):  $\delta$  = 1.03–1.16 (m, 1H), 1.16–1.29 (m, 1H), 1.37–1.58 (m, 3H), 2.21 (d, 1H, *J* = 13.3 Hz), 2.52–2.64 (m, 1H), 2.27 (d, 1H, *J* = 13.8 Hz), 3.64 (dd, 1H, *J* = 13.3/11.2 Hz), 4.05–4.25 (m, 2H), 4.84 (d, 1H, *J* = 15.7 Hz), 4.93 (d, 1H, *J* = 17.0 Hz), 5.01 (d, 1H, *J* = 10.2 Hz), 5.04 (d, 1H, *J* = 6.0 Hz), 5.62–5.74 (m, 1H), 7.02–7.09 (m, 1H), 7.16 (d, 1H, *J* = 7.8 Hz), 7.24–7.30 (m, 4H), 7.55 (t, 1H, *J* = 1.9 Hz), 7.65–7.75 (m, 1H), 7.93 (d, 2H, *J* = 1.9 Hz), 8.49 (d, 1H, *J* = 4.9 Hz) ppm.

<sup>13</sup>C-NMR (125 MHz, CDCl<sub>3</sub>):  $\delta$  = 15.7, 26.1, 27.1, 49.5, 51.2, 54.4, 54.8, 58.1, 116.8, 122.9, 123.0, 123.7, 124.9, 125.5, 129.4, 132.5, 136.3, 137.5, 139.3, 142.0, 144.7, 147.3, 156.4, 171.0 ppm.

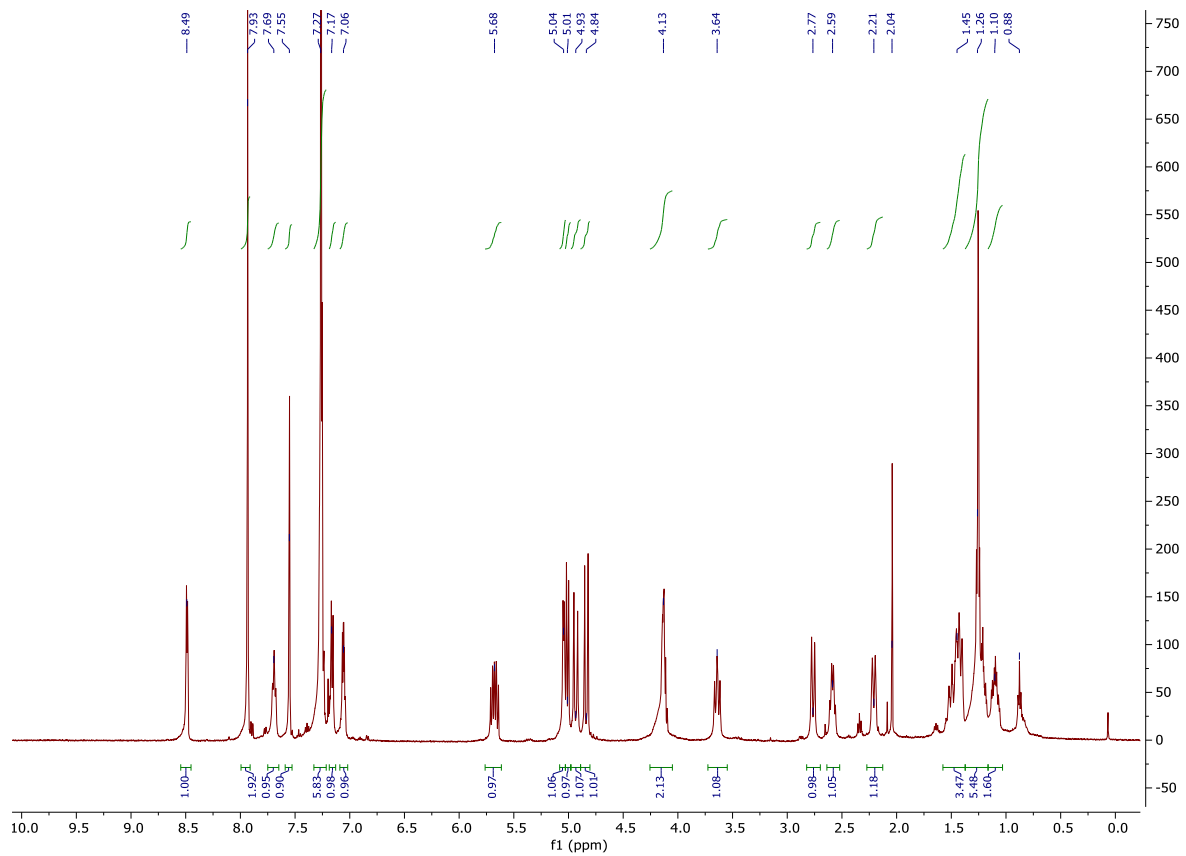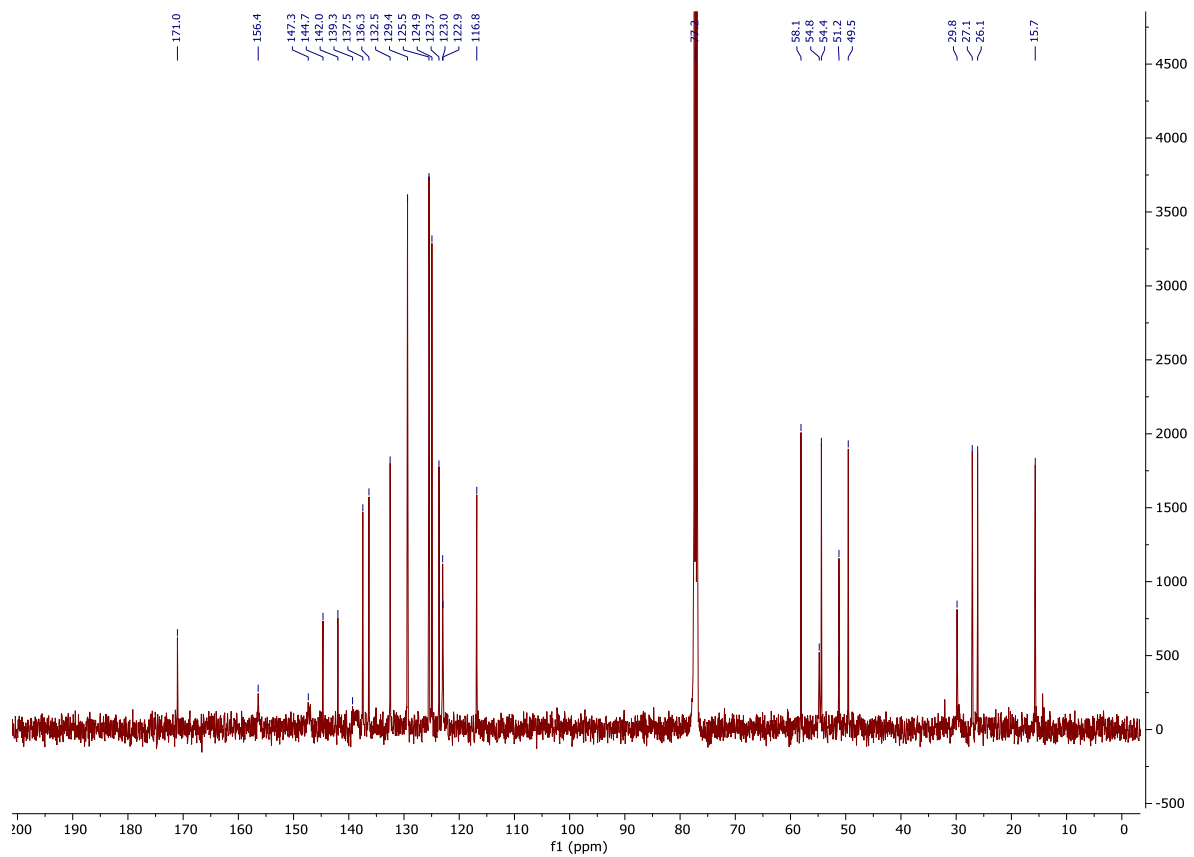

Compound 1: (1*S*,5*S*,6*R*)-10-(3,5-dichlorophenylsulfonyl)-3-(pyridin-2-ylmethyl)-5-vinyl-3,10-diazabicyclo[4.3.1]decan-2-one

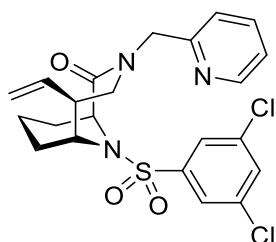

(1*S*,5*S*,6*R*)-3-(pyridin-2-ylmethyl)-5-vinyl-3,10-diazabicyclo[4.3.1]decan-2-one **2** (83 mg, 306  $\mu$ mol, 1.0 eq.) was dissolved in dry MeCN (5 mL) under argon atmosphere. DIPEA (100  $\mu$ L, 588  $\mu$ mol, 1.9 eq.) and 3,5-dichlorobenzenesulfonyl chloride (130 mg, 530  $\mu$ mol, 1.7 eq.) were added and the reaction mixture was stirred at room temperature. After 19 h water was added and it was extracted with DCM. The organic phase was dried over  $\text{MgSO}_4$ , filtered and concentrated *in vacuo*. The crude product was purified by semi-preparative HPLC (40-80 % MeCN in water) to afford **1**.

Yield: 70.4 mg, 48 %

Purity: >99 % (HPLC, UV-absorption 220 nm)

Appearance: colourless solid

TLC:  $R_f$  = 0.30 (Cy/EA 1:2)

MS (ESI):  $m/z$  calculated for sum formula  $\text{C}_{22}\text{H}_{23}\text{Cl}_2\text{N}_3\text{O}_3\text{S}$ :  $[\text{M}+\text{H}]^+ = 480.1$ , found:  $[\text{M}+\text{H}]^+ = 480.0$ , error: 0.1 Da or 0.2 ‰

$^1\text{H-NMR}$  (500 MHz,  $\text{CDCl}_3$ ):  $\delta$  = 1.16–1.36 (m, 2H), 1.46–1.55 (m, 2H), 1.55–1.67 (m, 1H), 2.30 (d, 1H,  $J$  = 13.5 Hz), 2.64–2.75 (m, 1H), 3.10 (dd, 1H,  $J$  = 14.2/1.7 Hz), 3.95–4.05 (m, 2H), 4.70–4.77 (m, 2H), 4.86 (d, 1H,  $J$  = 15.2 Hz), 4.97 (d, 1H,  $J$  = 17.0 Hz), 5.03 (d, 1H,  $J$  = 10.1 Hz), 5.63–5.76 (m, 1H), 7.18 (dd, 1H,  $J$  = 7.4/4.8 Hz), 7.30 (d, 1H,  $J$  = 7.8 Hz), 7.55 (t, 1H,  $J$  = 1.8 Hz), 7.64–7.68 (m, 1H), 7.69 (d, 2H,  $J$  = 1.8 Hz), 8.51 (d, 1H,  $J$  = 4.8 Hz) ppm.

$^{13}\text{C-NMR}$  (125 MHz,  $\text{CDCl}_3$ ):  $\delta$  = 15.6, 26.5, 27.7, 49.2, 52.1, 55.0, 56.3, 57.0, 117.0, 122.2, 122.6, 125.0, 132.8, 136.4, 137.1, 137.3, 144.2, 149.2, 157.0, 170.5 ppm.

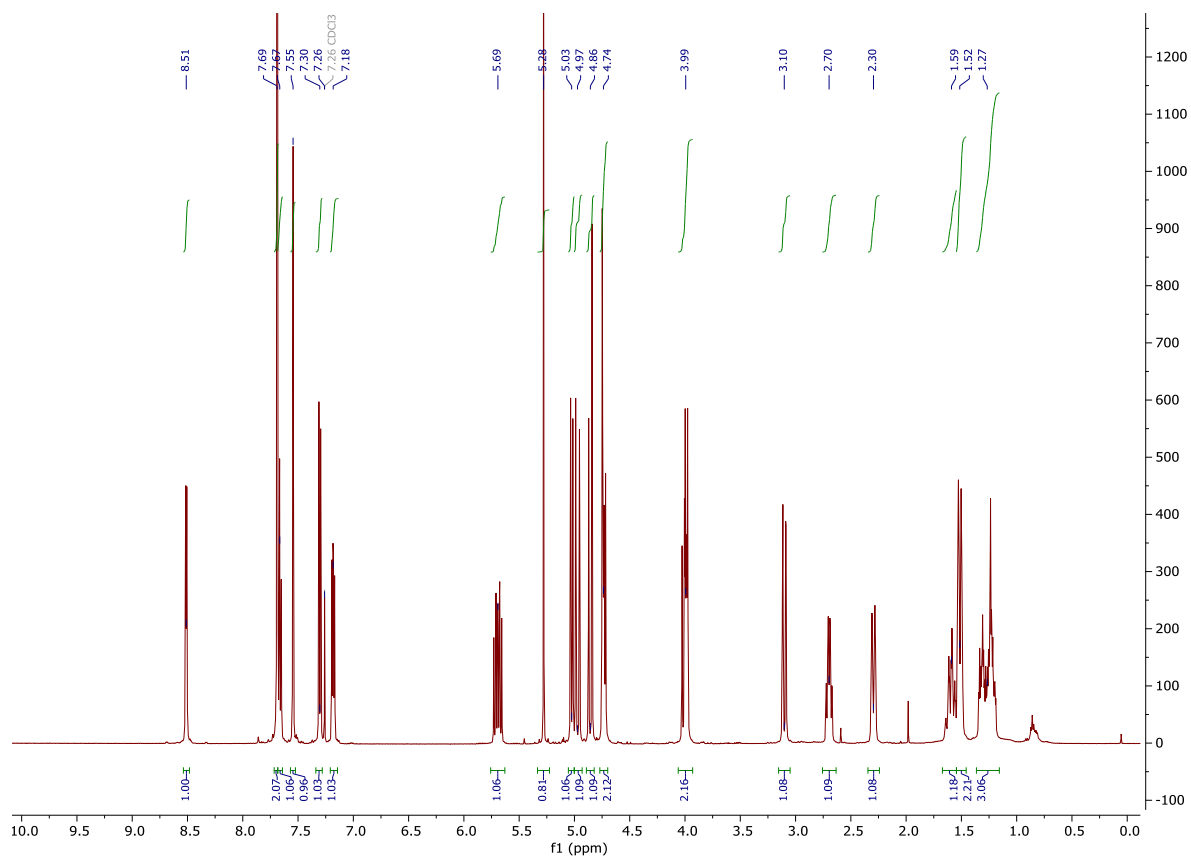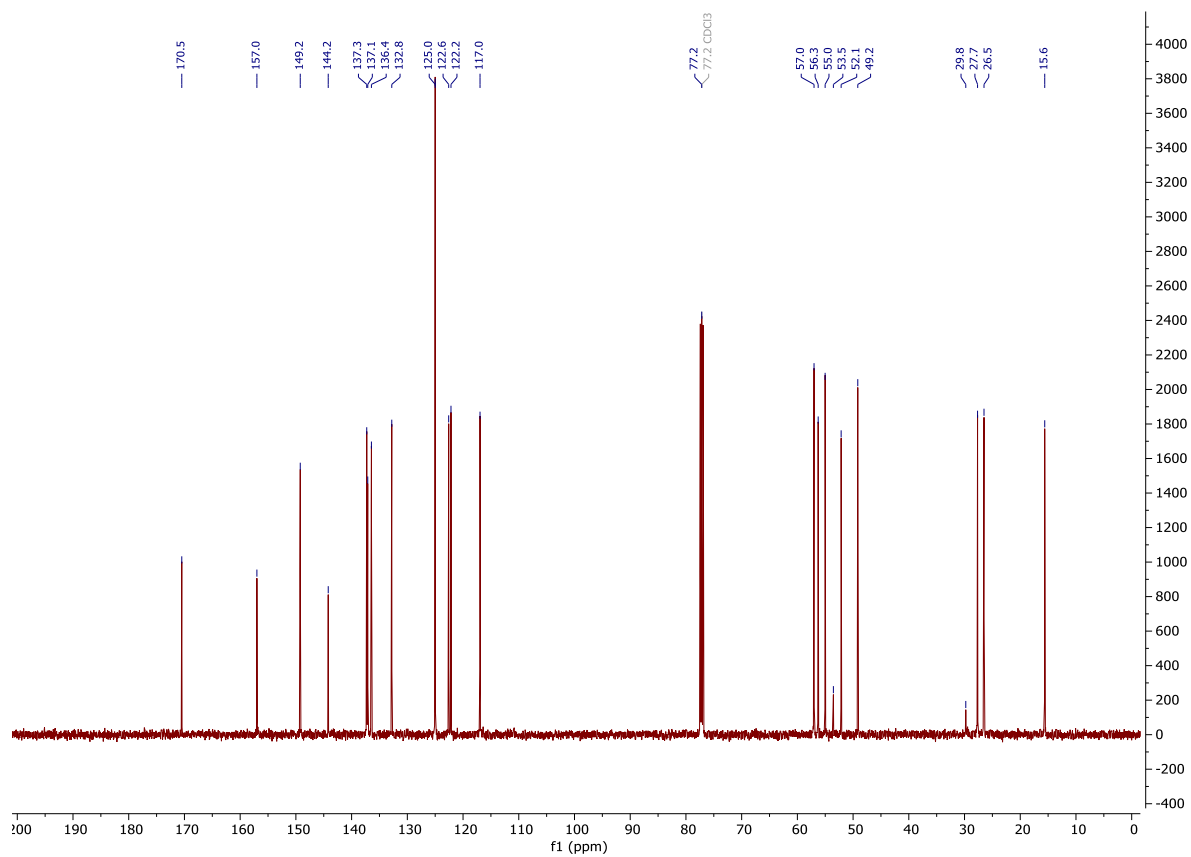

Compound **11**: (1*S*,5*S*,6*R*)-10-((3,5-dichlorophenyl)sulfonyl)-5-(1,2-dihydroxyethyl)-3-(pyridin-2-ylmethyl)-3,10-diazabicyclo[4.3.1]decan-2-one

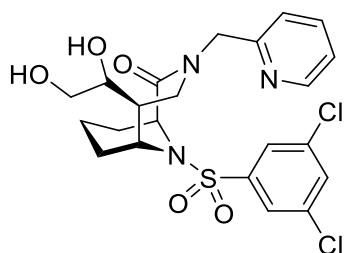

**1** (24 mg, 50  $\mu$ mol, 1.0 eq.) was dissolved in acetone (7 mL) and water (1 mL). 2,6-Lutidine (11.6  $\mu$ L, 100  $\mu$ mol, 2.0 eq.), NMO (11.7 mg, 100  $\mu$ mol, 2.0 eq.) and OsO<sub>4</sub> (2.5 wt.-% in <sup>t</sup>BuOH, 12.5  $\mu$ L, 0.1  $\mu$ mol, 2 mol.-%) were added and the mixture was stirred at room temperature for 16 h. The reaction was quenched with sat. aq. Na<sub>2</sub>S<sub>2</sub>O<sub>3</sub> and extracted with EA. The crude product was purified by silica gel column chromatography (Cy/EA 1:1 – EA + 10% MeOH) to afford **11**.

Yield: 14 mg, 54 %

Purity: >99 % (HPLC, UV-absorption 220 nm), diastereomeric ratio 51:49

Appearance: colourless solid

TLC: R<sub>f</sub> = 0.30 (Cy/EA 1:2)

MS (ESI): m/z calculated for sum formula C<sub>22</sub>H<sub>25</sub>Cl<sub>2</sub>N<sub>3</sub>O<sub>5</sub>S: [M+H]<sup>+</sup> = 514.1, found: [M+H]<sup>+</sup> = 514.7, error: 0.6 Da or 1.2 ‰

<sup>1</sup>H-NMR (500 MHz, CDCl<sub>3</sub>):  $\delta$  = 1.15-1.28 (m, 1H), 1.33-1.49 (m, 3H), 1.53-1.64 (m, 1H), 2.23 (d, 1H, J = 13.0 Hz), 2.28-2.40 (m, 1H), 3.61-3.60 (m, 2H), 3.65-3.69 (m, 1H), 3.69-3.72 (m, 1H), 3.98 (ddd, 1H, J = 22.7/14.5/10.5 Hz), 4.18-4.33 (m, 1H), 4.69 (dd, 1H, J = 14.9/7.6 Hz), 4.73 (d, 1H, J = 5.8 Hz), 5.04 (t, 1H, J = 15.4 Hz), 7.35-7.43 (m, 1H), 7.50-7.55 (m, 1H), 7.55-7.57 (m, 1H), 7.70-7.73 (m, 2H), 7.83-7.91 (m, 1H), 8.53-8.59 (m, 1H) ppm.

<sup>13</sup>C-NMR (125 MHz, CDCl<sub>3</sub>):  $\delta$  = 15.5, 27.6, 28.0, 28.3, 28.9, 46.6, 47.2, 49.0, 49.7, 52.7, 52.8, 55.2, 55.4, 57.1, 57.2, 64.1, 64.3, 72.5, 73.2, 123.7, 123.8, 124.4, 124.6, 125.1, 125.1, 132.9, 136.5, 139.6, 139.8, 144.0, 144.1, 147.1, 147.3, 156.1, 156.2, 170.6, 170.7 ppm.

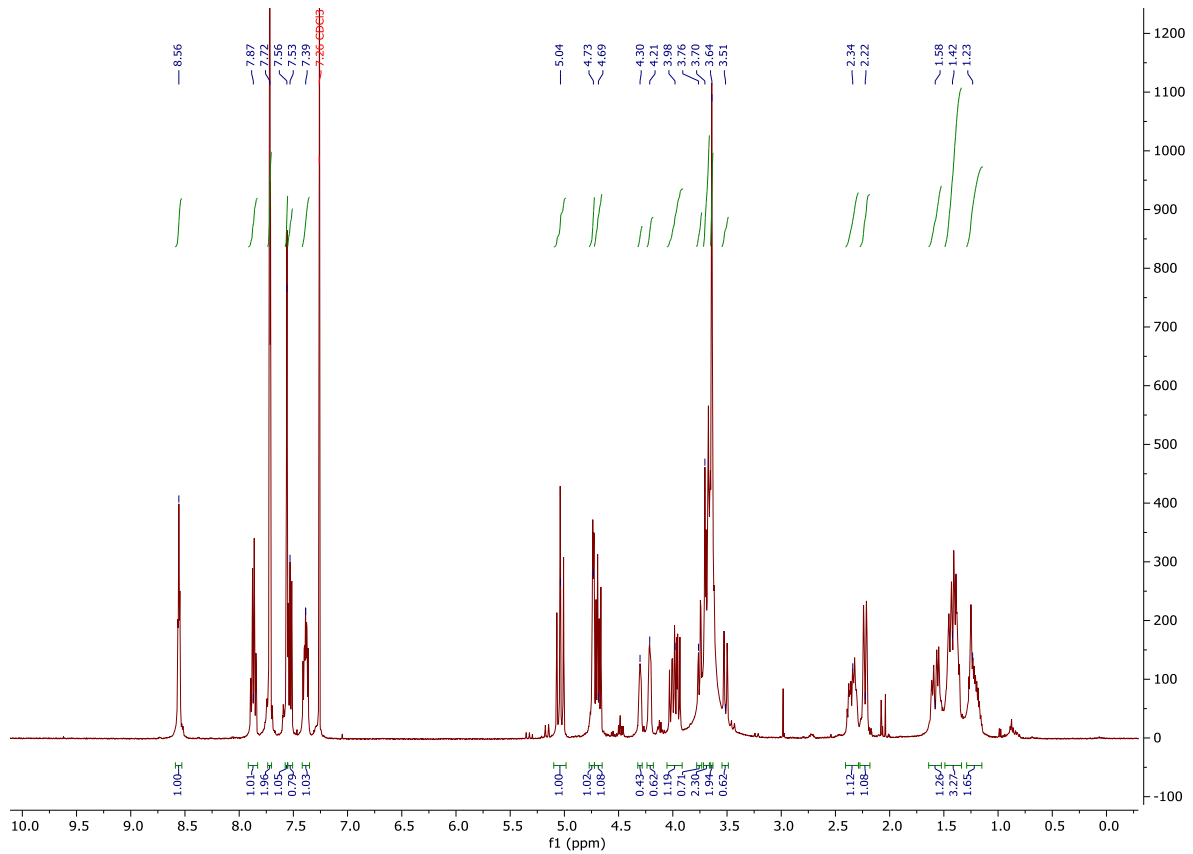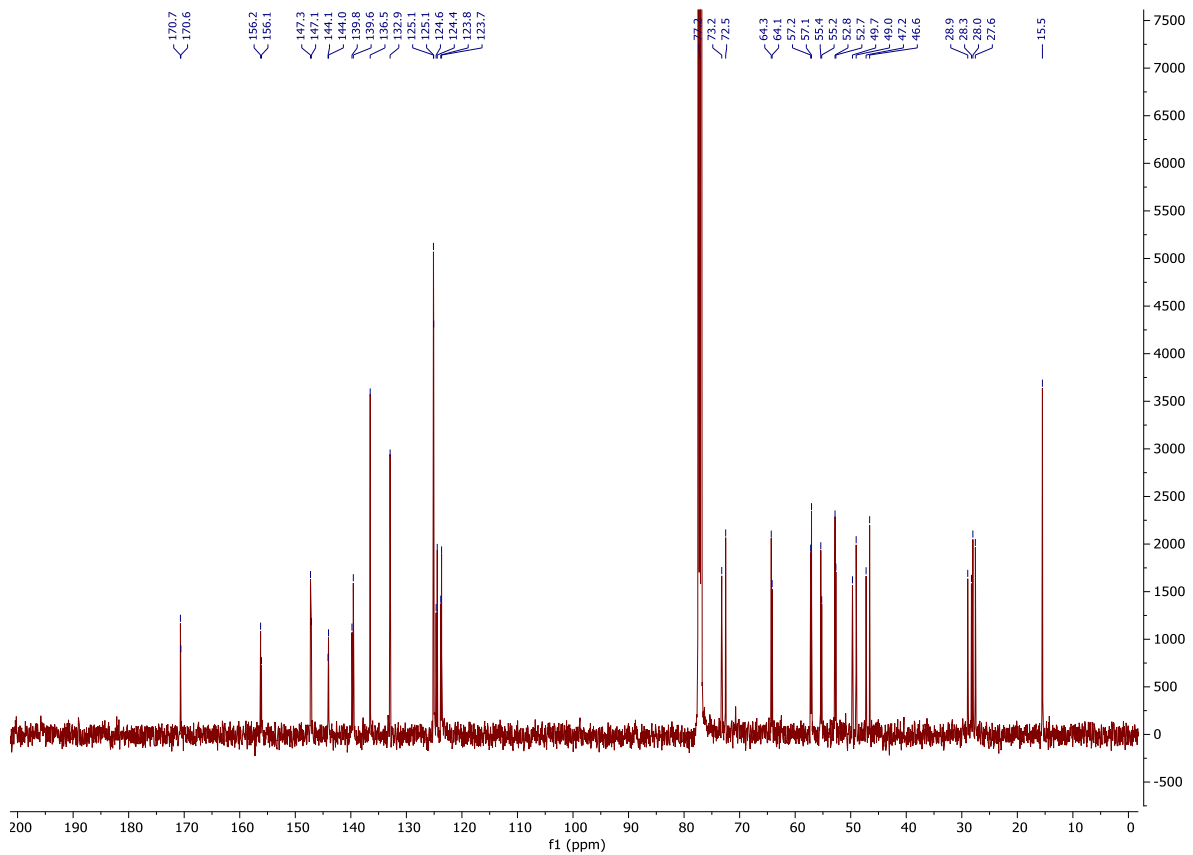



Compound **10**: (1*S*,5*S*,6*R*)-10-((*S*)-3,5-dichloro-*N*-phenylphenylsulfonimidoyl)-5-(1,2-dihydroxyethyl)-3-(pyridin-2-ylmethyl)-3,10-diazabicyclo[4.3.1]decan-2-one

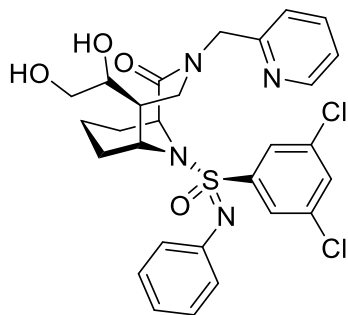

**9a** (5.0 mg, 9.0  $\mu$ mol, 1.0 eq.) was dissolved in acetone (1.0 mL) and water (0.1 mL). NMO (4.2 mg, 36  $\mu$ mol, 4.0 eq.), 2,6-lutidine (2.1  $\mu$ L, 18  $\mu$ mol, 2.0 eq.) and OsO<sub>4</sub> (2.5 wt-% in <sup>t</sup>BuOH, 5.8  $\mu$ L, 450 nmol, 0.05 eq.) were added and the reaction stirred at room temperature. After 17 h, additional NMO (4.0 mg, 34  $\mu$ mol, 3.8 eq.) and OsO<sub>4</sub> (2.5 wt-% in <sup>t</sup>BuOH, 5.8  $\mu$ L, 450 nmol, 0.05 eq.) were added. After 3 d, sat. aq. Na<sub>2</sub>S<sub>2</sub>O<sub>3</sub> was added and stirred for 30 min. Water was added and it was extracted with DCM. The organic phase was dried over MgSO<sub>4</sub>, filtered and concentrated *in vacuo*. The crude product was purified by semi-prep. HPLC (25-65 % MeCN in H<sub>2</sub>O) to afford **10**.

Yield: 3.3 mg, 62 %

Purity: 98 % (HPLC, UV-absorption 220 nm)

Appearance: colourless solid

TLC: R<sub>f</sub> = 0.49 (DCM/MeOH 10:1)

HR-MS (ESI): m/z calculated for sum formula C<sub>28</sub>H<sub>30</sub>Cl<sub>2</sub>N<sub>4</sub>O<sub>4</sub>S: [M+H]<sup>+</sup> = 589.14376, found: [M+H]<sup>+</sup> = 589.14340, error: 0.36 mDa or 0.61 ppm

<sup>1</sup>H-NMR (500 MHz, CDCl<sub>3</sub>):  $\delta$  = 1.05-1.18 (m, 1H), 1.38-1.57 (m, 3H), 1.59-1.67 (m, 1H), 2.18 (d, 1H, J = 14.0 Hz), 2.21-2.35 (m, 1H), 3.23 (d, 0.5H, J = 14.2 Hz), 3.39-3.77 (m, 4.5H), 4.55-4.62 (m, 0.5H), 4.70-4.77 (m, 0.5H), 4.85-4.90 (m, 1H), 4.95 (dd, 1H, J = 19.9/15.4 Hz), 5.24 (d, 1H, J = 15.5 Hz), 6.99 (q, 1H, J = 7.7 Hz), 7.11 (t, 2H, J = 8.0 Hz), 7.20 (q, 2H, J = 7.3 Hz), 7.53 (d, 1H, J = 2.5 Hz), 7.75 (t, 1H, J = 6.6 Hz), 7.82 (dd, 2H, J = 7.9/1.9 Hz), 7.85 (t, 1H, J = 9.2 Hz), 8.29 (t, 1H, J = 7.8 Hz), 8.71 (t, 1H, J = 6.0 Hz) ppm.

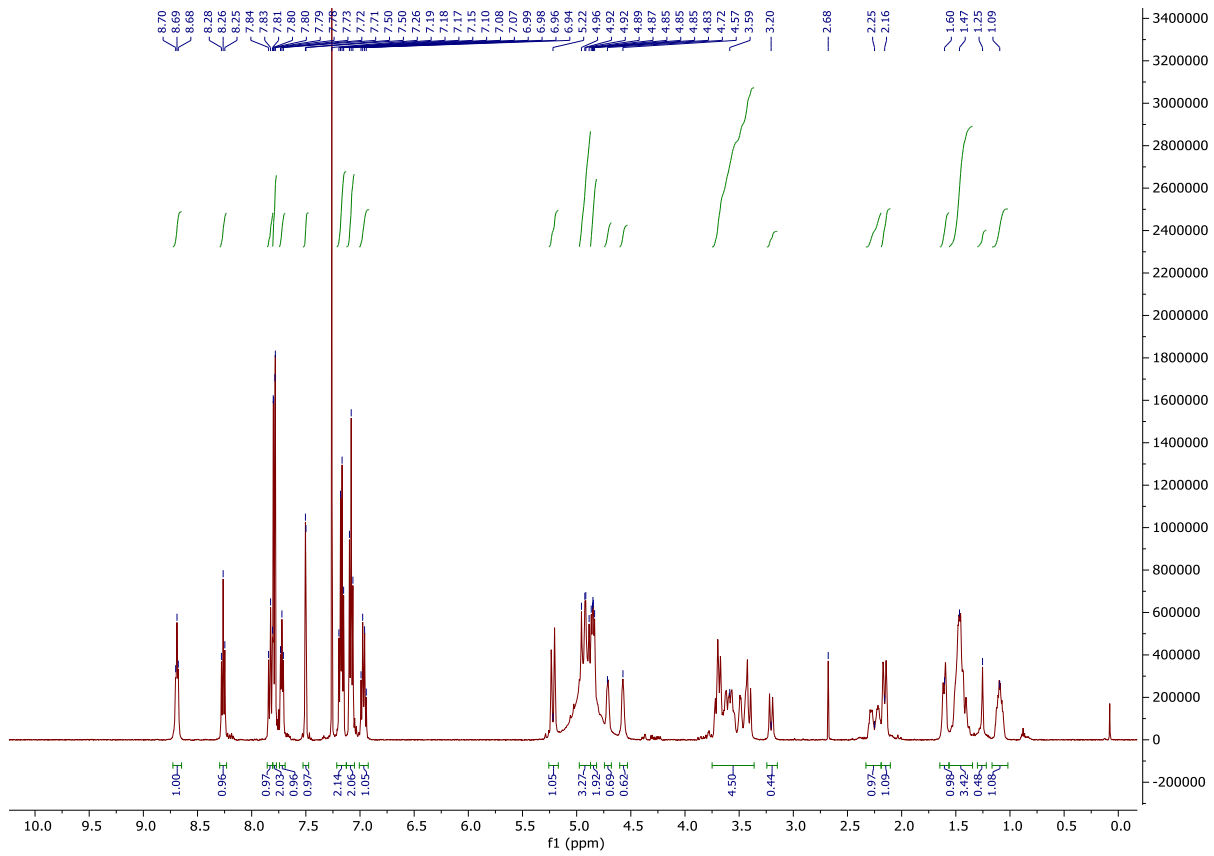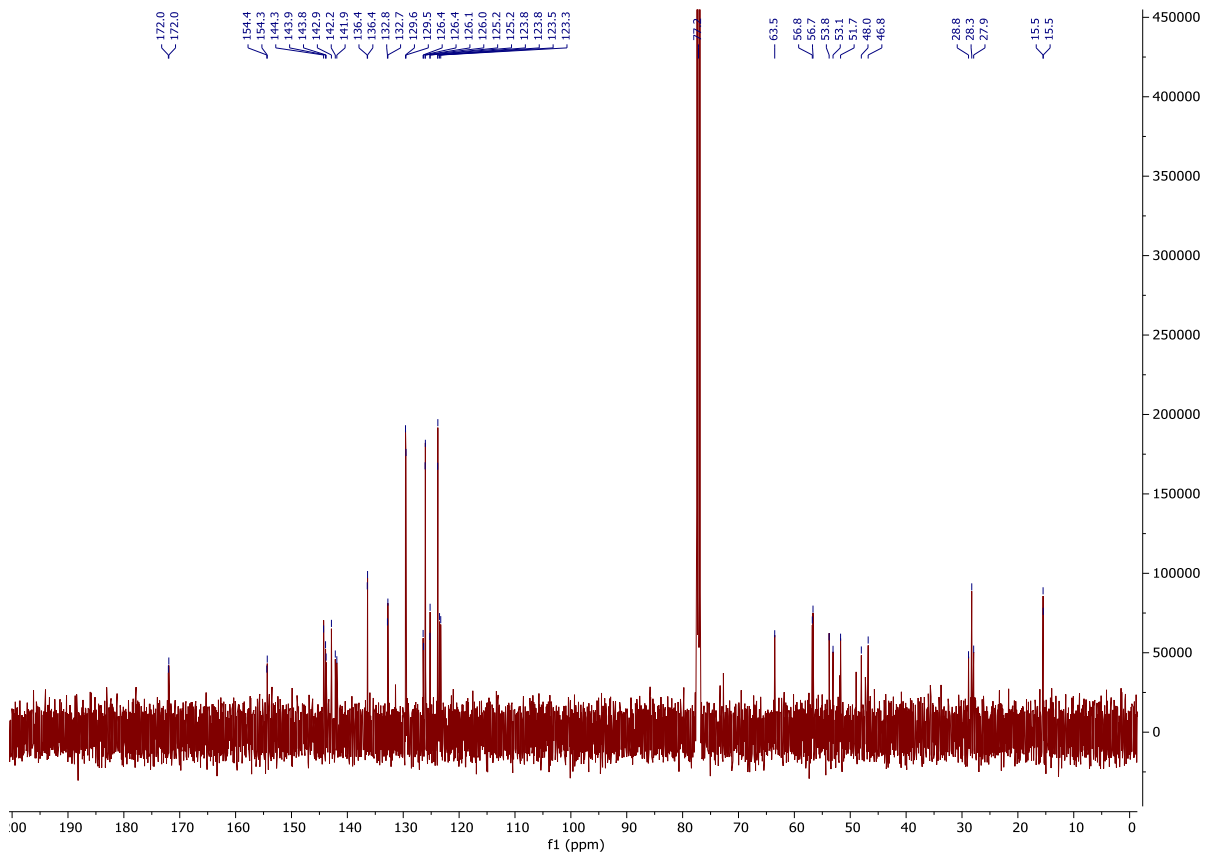

## References

- (1) Polasky, D. A.; Dixit, S. M.; Fantin, S. M.; Ruotolo, B. T. CIUSuite 2: Next-Generation Software for the Analysis of Gas-Phase Protein Unfolding Data. *Analytical chemistry* **2019**, *91* (4), 3147–3155. DOI: 10.1021/acs.analchem.8b05762. Published Online: Feb. 6, 2019.
- (2) Pomplun, S.; Sippel, C.; Hähle, A.; Tay, D.; Shima, K.; Klages, A.; Ünal, C. M.; Rieß, B.; Toh, H. T.; Hansen, G.; Yoon, H. S.; Bracher, A.; Preiser, P.; Rupp, J.; Steinert, M.; Hausch, F. Chemogenomic Profiling of Human and Microbial FK506-Binding Proteins. *Journal of medicinal chemistry* **2018**, *61* (8), 3660–3673. DOI: 10.1021/acs.jmedchem.8b00137. Published Online: Apr. 5, 2018.
- (3) Kolos, J. M.; Pomplun, S.; Jung, S.; Rieß, B.; Purder, P. L.; Voll, A. M.; Merz, S.; Gnatzy, M.; Geiger, T. M.; Quist-Løkken, I.; Jatzlau, J.; Knaus, P.; Holien, T.; Bracher, A.; Meyners, C.; Czodrowski, P.; Krewald, V.; Hausch, F. Picomolar FKBP inhibitors enabled by a single water-displacing methyl group in bicyclic 4.3.1 aza-amides. *Chemical science* **2021**, *12* (44), 14758–14765. DOI: 10.1039/D1SC04638A. Published Online: Nov. 3, 2021.
- (4) Gaali, S.; Kirschner, A.; Cuboni, S.; Hartmann, J.; Kozany, C.; Balsevich, G.; Namendorf, C.; Fernandez-Vizarra, P.; Sippel, C.; Zannas, A. S.; Draenert, R.; Binder, E. B.; Almeida, O. F. X.; Rühler, G.; Uhr, M.; Schmidt, M. V.; Touma, C.; Bracher, A.; Hausch, F. Selective inhibitors of the FK506-binding protein 51 by induced fit. *Nature chemical biology* **2015**, *11* (1), 33–37. DOI: 10.1038/nchembio.1699. Published Online: Dec. 1, 2014.
- (5) Jagtap, P. K. A.; Asami, S.; Sippel, C.; Kaila, V. R. I.; Hausch, F.; Sattler, M. Selective Inhibitors of FKBP51 Employ Conformational Selection of Dynamic Invisible States. *Angewandte Chemie (International ed. in English)* **2019**, *58* (28), 9429–9433. DOI: 10.1002/anie.201902994. Published Online: Jun. 5, 2019.
